# Supplementary material for: Metabolic network percolation quantifies biosynthetic capabilities across the human oral microbiome
Source: eLife journal article supplement (doi:10.7554/elife.39733), 2019-06-13
Supplement: supp [file elife_poa_e39733_Figure_1_figure_supplement_2.pdf › elife_poa_e39733_Figure_1_figure_supplement_2.pdf]

A

Precursors

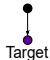

Target

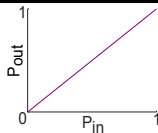

$$P_{out} = P_{in}$$

B

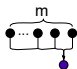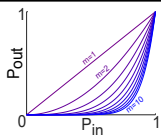

$$P_{out} = (P_{in})^m$$

C

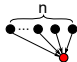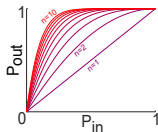

$$P_{out} = 1 - (1 - P_{in})^n = \sum_{i=1}^n (-1)^{i+1} \left[ \binom{n}{i} P_{in}^i \right]$$

D

 $S = \{1,2\},$   
 $\{2,3,4\}, \dots$ 
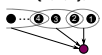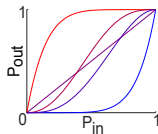

$$P_{out} = \sum_{i=1}^{|S|} (-1)^{i+1} \left[ \sum_{1 \leq j_1 < \dots < j_i \leq |S|} \left( P_{in}^{|\cup_{u=1}^i S_{j_u}|} \right) \right]$$
