# Supplementary material for: Metabolic network percolation quantifies biosynthetic capabilities across the human oral microbiome
Source: eLife. 2019 Jun 13;8:e39733. doi: 10.7554/eLife.39733 (PMC6609349; doi:10.7554/eLife.39733)
Supplement: Supplementary file 4. — Metadata related to the oral microbiome organisms analyzed in this work is provided. [file elife-39733-supp4.xlsx]

## Sheet: Sheet1
Gram Stain	Domain	Phylum	Class	Order	Family	Genus	Species	Culture Collection (Strain)	Filename	HOMD Sequence ID	NCBI Taxon ID	ftp for NCBI genome	NCBI Accession	Kbase ID	HOMD HMT ID	Genome Size (BP)	Kbase download notes
Negative	Bacteria	SR1	SR1 [C-1]	SR1 [O-1]	SR1 [F-1]	SR1 [G-1]	sp. oral taxon 874	MGEHA	Candidate_division_SR1_bacterium_MGEHA.mat	SEQF2626	1293577	ftp://ftp.ncbi.nlm.nih.gov/genomes/refseq/bacteria/candidate_division_SR1_bacterium_MGEHA/all_assembly_versions/suppressed/GCF_000350285.1_OR1	GCF_000350285.1	31884	874	1109712
Positive	Bacteria	TM7 Saccharibacteria	TM7 [C-1]	TM7 [O-1]	TM7 [F-1]	TM7 [G-1]	sp. oral taxon 488	AC001	TM7[G-1]_oral_taxon_488_AC001.mat	Not Yet Available	Not Yet Available	Not Yet Available	Not Yet Available	external	488	939249	manually uploaded genome, annotated with RAST
Positive	Bacteria	TM7 Saccharibacteria	TM7 [C-1]	TM7 [O-1]	TM7 [F-1]	TM7 [G-1]	sp. oral taxon 952	TM7x	TM7[G-1]_oral_taxon_952_TM7x.mat	SEQF2796	1476577	ftp://ftp.ncbi.nlm.nih.gov/genomes/refseq/bacteria/Candidatus_Saccharibacteria_oral_taxon_TM7x/all_assembly_versions/GCF_000803625.1_ASM80362v1	GCF_000803625.1	external	952	705138	manually uploaded genome, annotated with RAST
Positive	Bacteria	TM7 Saccharibacteria	TM7 [C-1]	TM7 [O-1]	TM7 [F-1]	TM7 [G-1]	sp. oral taxon 955	PM004	TM7[G-1]_oral_taxon_955_PM004.mat	Not Yet Available	Not Yet Available	Not Yet Available	Not Yet Available	external	955	864547	manually uploaded genome, annotated with RAST
Negative	Bacteria	Spirochaetes	Spirochaetia	Spirochaetales	Spirochaetaceae	Treponema	pallidum	str. Nichols	Treponema_pallidum_pallidum_Nichols.mat	SEQF1062	243276	ftp://ftp.ncbi.nlm.nih.gov/genomes/all/GCF/000/008/605/GCF_000008605.1_ASM860v1	GCF_000008605.1	495	805	1138011
Negative	Bacteria	Firmicutes	Mollicutes	Mycoplasmatales	Mycoplasmataceae	Mycoplasma	salivarium	ATCC 23064	Mycoplasma_salivarium_ATCC_23064.mat	SEQF2607	1266997	ftp://ftp.ncbi.nlm.nih.gov/genomes/all/GCF/000/485/555/GCF_000485555.1_ASM48555v1	GCF_000485555.1	208532	754	713526
Negative	Bacteria	Firmicutes	Mollicutes	Mycoplasmatales	Mycoplasmataceae	Mycoplasma	fermentans	M64	Mycoplasma_fermentans_M64.mat	SEQF1263	943945	ftp://ftp.ncbi.nlm.nih.gov/genomes/all/GCF/000/186/005/GCF_000186005.1_ASM18600v1	GCF_000186005.1	3786	607	1118751
Negative	Bacteria	Firmicutes	Mollicutes	Mycoplasmatales	Mycoplasmataceae	Mycoplasma	fermentans	JER	Mycoplasma_fermentans_JER.mat	SEQF1928	637387	ftp://ftp.ncbi.nlm.nih.gov/genomes/all/GCF/000/148/625/GCF_000148625.1_ASM14862v1	GCF_000148625.1	2699	607	977524
Negative	Bacteria	Firmicutes	Mollicutes	Mycoplasmatales	Mycoplasmataceae	Mycoplasma	orale	ATCC 23714	Mycoplasma_orale_ATCC_23714.mat	SEQF2553	1266996	ftp://ftp.ncbi.nlm.nih.gov/genomes/all/GCF/000/420/105/GCF_000420105.1_ASM42010v1	GCF_000420105.1	208531	704	710549
Negative	Bacteria	Firmicutes	Mollicutes	Mycoplasmatales	Mycoplasmataceae	Mycoplasma	hominis	ATCC 23114	Mycoplasma_hominis_ATCC_23114.mat	SEQF1722	347256	ftp://ftp.ncbi.nlm.nih.gov/genomes/all/GCF/000/085/865/GCF_000085865.1_ASM8586v1	GCF_000085865.1	26459	632	665445
Negative	Bacteria	Firmicutes	Mollicutes	Mycoplasmatales	Mycoplasmataceae	Mycoplasma	hominis	ATCC 27545	Mycoplasma_hominis_ATCC_27545.mat	SEQF2524	1267000	ftp://ftp.ncbi.nlm.nih.gov/genomes/all/GCF/000/385/075/GCF_000385075.1_ASM38507v1	GCF_000385075.1	31627	632	684158
Negative	Bacteria	Firmicutes	Mollicutes	Mycoplasmatales	Mycoplasmataceae	Mycoplasma	pneumoniae	M129, ATCC29342	Mycoplasma_pneumoniae_M129.mat	SEQF1271	272634	ftp://ftp.ncbi.nlm.nih.gov/genomes/all/GCF/000/027/345/GCF_000027345.1_ASM2734v1	GCF_000027345.1	623	732	816394
Negative	Bacteria	Firmicutes	Mollicutes	Mycoplasmatales	Mycoplasmataceae	Mycoplasma	genitalium	G37, ATCC 33530	Mycoplasma_genitalium_G-37.mat	SEQF1267	243273	ftp://ftp.ncbi.nlm.nih.gov/genomes/all/GCF/000/027/325/GCF_000027325.1_ASM2732v1	GCF_000027325.1	490	616	580074
Negative	Bacteria	Proteobacteria	Deltaproteobacteria	Desulfobacterales	Desulfobulbaceae	Desulfobulbus	sp. oral taxon 041	Dsb2	Desulfobulbus_oral_taxon_041_Dsb2.mat	SEQF2485	1292047	ftp://ftp.ncbi.nlm.nih.gov/genomes/refseq/bacteria/Desulfobulbus_sp._oral_taxon_041/all_assembly_versions/suppressed/GCF_000349365.1_Dsb2	GCF_000349365.1	31873	41	676885
Negative	Bacteria	Proteobacteria	Deltaproteobacteria	Desulfobacterales	Desulfobulbaceae	Desulfobulbus	sp. oral taxon 041	Dsb3	Desulfobulbus_oral_taxon_041_Dsb3.mat	SEQF2486	1292048	ftp://ftp.ncbi.nlm.nih.gov/genomes/refseq/bacteria/Desulfobulbus_sp._oral_taxon_041/all_assembly_versions/suppressed/GCF_000349345.1_Dsb3	GCF_000349345.1	31874	41	736505
Negative	Bacteria	Chloroflexi	Anaerolineae	Anaerolineales	Anaerolineaceae	Anaerolineae [G-1]	sp. oral taxon 439	isolate Chl2	Chloroflexi_bacterium_oral_taxon_439_isolate_Chl2.mat	SEQF2641	1311575	ftp://ftp.ncbi.nlm.nih.gov/genomes/refseq/bacteria/Chloroflexi_bacterium_oral_taxon_439/all_assembly_versions/suppressed/GCF_000406805.1_Chl2	GCF_000406805.1	209765	439	1160015
Positive	Bacteria	Firmicutes	Clostridia	Clostridiales	Clostridiales [F-3]	Clostridiales [F-3][G-1]	sp. oral taxon 876	F0540	Clostridiales_[F-1][G-1]_oral_taxon_876_F0540.mat	SEQF2456	1321778	ftp://ftp.ncbi.nlm.nih.gov/genomes/all/GCF/000/466/585/GCF_000466585.1_ASM46658v1	GCF_000466585.1	209874	876	4764532
Positive	Bacteria	Firmicutes	Erysipelotrichia	Erysipelotrichales	Erysipelotrichaceae	Eggerthia	catenaformis	OT 569 = DSM 20559	Lactobacillus_catenaforme_OT_569_DSM_20559.mat	SEQF2477	999415	ftp://ftp.ncbi.nlm.nih.gov/genomes/all/GCF/000/340/375/GCF_000340375.1_Lact_cate_OT_569_V1	GCF_000340375.1	32469	569	1935589	Name change, Genus: "Eggerthia"
Negative	Bacteria	Synergistetes	Synergistia	Synergistales	Dethiosulfovibrionaceae	Pyramidobacter	piscolens	W5455, DSM 21147, CCUG 55836, F0317	Pyramidobacter_piscolens_W5455.mat	SEQF1611	352165	ftp://ftp.ncbi.nlm.nih.gov/genomes/all/GCF/000/177/335/GCF_000177335.1_ASM17733v1	GCF_000177335.1	1034	357	2562014
Positive	Bacteria	Firmicutes	Bacilli	Bacillales	Bacillaceae	Bacillus	subtilis	BSn5	Bacillus_subtilis_BSn5.mat	SEQF1173	936156	ftp://ftp.ncbi.nlm.nih.gov/genomes/all/GCF/000/186/745/GCF_000186745.1_ASM18674v1	GCF_000186745.1	3768	468	4093599
Positive	Bacteria	Firmicutes	Bacilli	Bacillales	Bacillaceae	Bacillus	anthracis	A0248	Bacillus_anthracis_A0248.mat	SEQF1708	592021	ftp://ftp.ncbi.nlm.nih.gov/genomes/all/GCF/000/022/865/GCF_000022865.1_ASM2286v1	GCF_000022865.1	2567	824	5503926
Positive	Bacteria	Firmicutes	Bacilli	Lactobacillales	Enterococcaceae	Enterococcus	durans	ATCC 6056	Enterococcus_durans_ATCC_6056.mat	SEQF2534	1140001	ftp://ftp.ncbi.nlm.nih.gov/genomes/all/GCF/000/406/985/GCF_000406985.1_Ente_dura_ATCC6056_V1	GCF_000406985.1	29871	880	3170474
Positive	Bacteria	Firmicutes	Bacilli	Lactobacillales	Enterococcaceae	Enterococcus	saccharolyticus	30_1	Enterococcus_saccharolyticus_30_1.mat	SEQF2060	742813	ftp://ftp.ncbi.nlm.nih.gov/genomes/all/GCF/000/234/175/GCF_000234175.1_Ente_sacc_30_1_V1	GCF_000234175.1	27484	802	3119200
Positive	Bacteria	Firmicutes	Bacilli	Lactobacillales	Enterococcaceae	Enterococcus	durans	FB129-CNAB4	Enterococcus_durans_FB129-CNAB-4.mat	SEQF2417	883162	ftp://ftp.ncbi.nlm.nih.gov/genomes/all/GCF/000/315/405/GCF_000315405.1_Ente_dura_FB129-CNAB4_V1	GCF_000315405.1	28047	880	2697649
Positive	Bacteria	Firmicutes	Bacilli	Lactobacillales	Enterococcaceae	Enterococcus	faecalis	V583, ATCC 700802	Enterococcus_faecalis_V583.mat	SEQF1080	226185	ftp://ftp.ncbi.nlm.nih.gov/genomes/all/GCF/000/007/785/GCF_000007785.1_ASM778v1	GCF_000007785.1	435	604	3359974
Positive	Bacteria	Firmicutes	Bacilli	Bacillales	Staphylococcaceae	Staphylococcus	epidermidis	RP62A, ATCC 35984	Staphylococcus_epidermidis_RP62A.mat	SEQF1324	176279	ftp://ftp.ncbi.nlm.nih.gov/genomes/all/GCF/000/011/925/GCF_000011925.1_ASM1192v1	GCF_000011925.1	164	601	2643840
Positive	Bacteria	Firmicutes	Bacilli	Bacillales	Staphylococcaceae	Staphylococcus	caprae	C87	Staphylococcus_caprae_C87.mat	SEQF2204	435838	ftp://ftp.ncbi.nlm.nih.gov/genomes/all/GCF/000/183/705/GCF_000183705.1_ASM18370v1	GCF_000183705.1	1456	567	2473608
Positive	Bacteria	Firmicutes	Bacilli	Bacillales	Staphylococcaceae	Staphylococcus	epidermidis	W23144	Staphylococcus_epidermidis_W23144.mat	SEQF1838	525376	ftp://ftp.ncbi.nlm.nih.gov/genomes/all/GCF/000/160/235/GCF_000160235.1_ASM16023v1	GCF_000160235.1	2027	601	2646585
Positive	Bacteria	Firmicutes	Bacilli	Bacillales	Staphylococcaceae	Staphylococcus	warneri	L37603	Staphylococcus_warneri_L37603.mat	SEQF1839	596319	ftp://ftp.ncbi.nlm.nih.gov/genomes/all/GCF/000/175/175/GCF_000175175.1_ASM17517v1	GCF_000175175.1	2605	76	2425653
Positive	Bacteria	Firmicutes	Bacilli	Bacillales	Staphylococcaceae	Staphylococcus	aureus	JH1	Staphylococcus_aureus_aureus_JH1.mat	SEQF1312	359787	ftp://ftp.ncbi.nlm.nih.gov/genomes/all/GCF/000/017/125/GCF_000017125.1_ASM1712v1	GCF_000017125.1	1057	550	2936936
Positive	Bacteria	Firmicutes	Bacilli	Bacillales	Staphylococcaceae	Staphylococcus	aureus	WW2703/97	Staphylococcus_aureus_aureus_WW2703_97.mat	SEQF1835	585161	ftp://ftp.ncbi.nlm.nih.gov/genomes/all/GCF/000/162/735/GCF_000162735.1_ASM16273v1	GCF_000162735.1	2522	550	2804748
Positive	Bacteria	Firmicutes	Bacilli	Lactobacillales	Lactobacillaceae	Lactobacillus	parafarraginis	F0439	Lactobacillus_parafarraginis_F0439.mat	SEQF1862	797515	ftp://ftp.ncbi.nlm.nih.gov/genomes/all/GCF/000/238/835/GCF_000238835.1_ASM23883v1	GCF_000238835.1	27793	418	2852137
Positive	Bacteria	Firmicutes	Bacilli	Lactobacillales	Streptococcaceae	Lactococcus	lactis	IL1403	Lactococcus_lactis_lactis_IL1403.mat	SEQF1482	272623	ftp://ftp.ncbi.nlm.nih.gov/genomes/all/GCF/000/006/865/GCF_000006865.1_ASM686v1	GCF_000006865.1	613	804	2365589
Positive	Bacteria	Firmicutes	Bacilli	Lactobacillales	Streptococcaceae	Lactococcus	lactis	KF147	Lactococcus_lactis_lactis_KF147.mat	SEQF1719	684738	ftp://ftp.ncbi.nlm.nih.gov/genomes/all/GCF/000/025/045/GCF_000025045.1_ASM2504v1	GCF_000025045.1	2963	804	2635654
Positive	Bacteria	Firmicutes	Bacilli	Lactobacillales	Lactobacillaceae	Lactobacillus	pentosus	KCA1	Lactobacillus_pentosus_KCA1.mat	SEQF2419	1136177	ftp://ftp.ncbi.nlm.nih.gov/genomes/all/GCF/000/271/445/GCF_000271445.1_KCA1_v9	GCF_000271445.1	24585	883	3426323
Positive	Bacteria	Firmicutes	Bacilli	Lactobacillales	Lactobacillaceae	Lactobacillus	plantarum	subsp. plantarum ATCC 14917	Lactobacillus_plantarum_plantarum_ATCC_14917.mat	SEQF1984	525338	ftp://ftp.ncbi.nlm.nih.gov/genomes/all/GCF/000/143/745/GCF_000143745.1_ASM14374v1	GCF_000143745.1	2012	861	3246832
Positive	Bacteria	Firmicutes	Bacilli	Lactobacillales	Lactobacillaceae	Lactobacillus	plantarum	subsp. plantarum ST-III	Lactobacillus_plantarum_plantarum_ST-III.mat	SEQF2113	889932	ftp://ftp.ncbi.nlm.nih.gov/genomes/all/GCF/000/148/815/GCF_000148815.2_ASM14881v1	GCF_000148815.2	3637	861	3307936
Positive	Bacteria	Firmicutes	Bacilli	Lactobacillales	Lactobacillaceae	Lactobacillus	kisonensis	F0435	Lactobacillus_kisonensis_F0435.mat	SEQF1861	797516	ftp://ftp.ncbi.nlm.nih.gov/genomes/all/GCF/000/242/275/GCF_000242275.1_ASM24227v1	GCF_000242275.1	27794	424	2970276
Positive	Bacteria	Firmicutes	Bacilli	Bacillales	Listeriaceae	Listeria	monocytogenes	5578-08-01	Listeria_monocytogenes_08-5578.mat	SEQF1053	653938	ftp://ftp.ncbi.nlm.nih.gov/genomes/all/GCF/000/093/125/GCF_000093125.2_ASM9312v2	GCF_000093125.2	2786	825	3109342
Positive	Bacteria	Firmicutes	Bacilli	Bacillales	Listeriaceae	Listeria	monocytogenes	serotype 4b str. CLIP 80459	Listeria_monocytogenes_serotype_4b_CLIP_80459.mat	SEQF1721	568819	ftp://ftp.ncbi.nlm.nih.gov/genomes/all/GCF/000/026/705/GCF_000026705.1_ASM2670v1	GCF_000026705.1	2676	825	2912690
Positive	Bacteria	Firmicutes	Bacilli	Lactobacillales	Lactobacillaceae	Lactobacillus	buchneri	NRRL B-30929	Lactobacillus_buchneri_NRRL_B-30929.mat	SEQF2428	511437	ftp://ftp.ncbi.nlm.nih.gov/genomes/all/GCF/000/211/375/GCF_000211375.1_ASM21137v1	GCF_000211375.1	1871	881	2588309
Positive	Bacteria	Firmicutes	Bacilli	Lactobacillales	Lactobacillaceae	Lactobacillus	buchneri	ATCC 11577	Lactobacillus_buchneri_ATCC_11577.mat	SEQF2418	525318	ftp://ftp.ncbi.nlm.nih.gov/genomes/all/GCF/000/159/195/GCF_000159195.1_ASM15919v1	GCF_000159195.1	2004	881	2906028
Negative	Bacteria	Actinobacteria	Actinobacteria	Propionibacteriales	Propionibacteriaceae	Pseudopropionibacterium	propionicum	F0700	Pseudopropionibacterium_propionicum_F0700.mat	Not Yet Available	Not Yet Available	Not Yet Available	Not Yet Available	external	739	3461981	manually uploaded genome, annotated with RAST
Negative	Bacteria	Actinobacteria	Actinobacteria	Propionibacteriales	Propionibacteriaceae	Pseudopropionibacterium	propionicum	F0230a	Propionibacterium_propionicum_F0230a.mat	SEQF1678	767029	ftp://ftp.ncbi.nlm.nih.gov/genomes/all/GCF/000/277/715/GCF_000277715.1_ASM27771v1	GCF_000277715.1	27741	739	3449360
Positive	Bacteria	Firmicutes	Clostridia	Clostridiales	Peptostreptococcaceae [XI]	Peptostreptococcaceae [XI][G-7]	[Eubacterium] yurii subsps. yurii & margaretiae	ATCC 43715	Eubacterium_yurii_margaretiae_ATCC_43715.mat	SEQF1912	864565	ftp://ftp.ncbi.nlm.nih.gov/genomes/all/GCF/000/146/855/GCF_000146855.1_ASM14685v1	GCF_000146855.1	3448	377	2511030
Positive	Bacteria	Firmicutes	Clostridia	Clostridiales	Lachnospiraceae [XIV]	Oribacterium	sinus	F0268	Oribacterium_sinus_F0268.mat	SEQF1607	585501	ftp://ftp.ncbi.nlm.nih.gov/genomes/all/GCF/000/160/635/GCF_000160635.1_ASM16063v1	GCF_000160635.1	2530	457	2706954
Positive	Bacteria	Firmicutes	Clostridia	Clostridiales	Lachnospiraceae [XIV]	Oribacterium	sp. oral taxon 078	F0262	Oribacterium_oral_taxon_078_F0262.mat	SEQF1603	608534	ftp://ftp.ncbi.nlm.nih.gov/genomes/all/GCF/000/160/135/GCF_000160135.1_ASM16013v1	GCF_000160135.1	2629	78	2674927
Positive	Bacteria	Firmicutes	Clostridia	Clostridiales	Lachnospiraceae [XIV]	Stomatobaculum	longum	longum	Lachnospiraceae_bacterium_ACC2.mat	SEQF2481	49875	Not Found	[]	27788	419	2308581
Positive	Bacteria	Firmicutes	Clostridia	Clostridiales	Lachnospiraceae [XIV]	Johnsonella	ignava	ATCC 51276	Johnsonella_ignava_ATCC_51276.mat	SEQF1672	679200	ftp://ftp.ncbi.nlm.nih.gov/genomes/all/GCF/000/235/445/GCF_000235445.1_John_igna_ATCC_51276_V1	GCF_000235445.1	27341	635	2672404
Positive	Bacteria	Firmicutes	Clostridia	Clostridiales	Lachnospiraceae [XIV]	Lachnoanaerobaculum	orale	F0431	Lachnospiraceae_bacterium_oral_taxon_082_F0431.mat	SEQF1881	861454	ftp://ftp.ncbi.nlm.nih.gov/genomes/all/GCF/000/242/315/GCF_000242315.1_ASM24231v1	GCF_000242315.1	27835	82	2938075
Positive	Bacteria	Firmicutes	Clostridia	Clostridiales	Lachnospiraceae [XIV]	Lachnoanaerobaculum	saburreum	F0468	Lachnoanaerobaculum_saburreum_F0468.mat	SEQF2761	1095750	ftp://ftp.ncbi.nlm.nih.gov/genomes/refseq/bacteria/Lachnoanaerobaculum_saburreum/all_assembly_versions/GCF_000257705.1_EsaburreumF0468v1.0	GCF_000257705.1	24177	494	3074086	Name changed, Genus: "Eubacterium"
Positive	Bacteria	Firmicutes	Clostridia	Clostridiales	Lachnospiraceae [XIV]	Shuttleworthia	satelles	DSM 14600, BAA-774, CCUG 45864	Shuttleworthia_satelles_DSM_14600.mat	SEQF1045	626523	ftp://ftp.ncbi.nlm.nih.gov/genomes/all/GCF/000/160/115/GCF_000160115.1_ASM16011v1	GCF_000160115.1	2652	95	2169477
Negative	Bacteria	Fusobacteria	Fusobacteriia	Fusobacteriales	Leptotrichiaceae	Leptotrichia	buccalis	C-1013-b, DSM 1135, ATCC 14201, JCM 1296	Leptotrichia_buccalis_C-1013-b.mat	SEQF1287	523794	ftp://ftp.ncbi.nlm.nih.gov/genomes/all/GCF/000/023/905/GCF_000023905.1_ASM2390v1	GCF_000023905.1	1972	563	2465610
Positive	Bacteria	Firmicutes	Clostridia	Clostridiales	Eubacteriaceae [XV]	Pseudoramibacter	alactolyticus	ATCC 23263	Pseudoramibacter_alactolyticus_ATCC_23263.mat	SEQF1993	887929	ftp://ftp.ncbi.nlm.nih.gov/genomes/all/GCF/000/185/505/GCF_000185505.1_ASM18550v1	GCF_000185505.1	3589	538	2362882
Positive	Bacteria	Firmicutes	Clostridia	Clostridiales	Eubacteriaceae [XV]	Eubacterium	limosum	KIST612	Eubacterium_limosum_KIST612.mat	SEQF1927	903814	ftp://ftp.ncbi.nlm.nih.gov/genomes/all/GCF/000/152/245/GCF_000152245.2_ASM15224v2	GCF_000152245.2	3647	655	4276902
Negative	Bacteria	Fusobacteria	Fusobacteriia	Fusobacteriales	Leptotrichiaceae	Leptotrichia	goodfellowii	DSM 19756	Leptotrichia_goodfellowii_DSM_19756.mat	SEQF2629	714315	ftp://ftp.ncbi.nlm.nih.gov/genomes/all/GCF/000/516/535/GCF_000516535.1_ASM51653v1	GCF_000516535.1	216239	845	2280962
Negative	Bacteria	Fusobacteria	Fusobacteriia	Fusobacteriales	Leptotrichiaceae	Leptotrichia	goodfellowii	F0264	Leptotrichia_goodfellowii_F0264.mat	SEQF1600	596323	ftp://ftp.ncbi.nlm.nih.gov/genomes/all/GCF/000/176/335/GCF_000176335.1_ASM17633v1	GCF_000176335.1	27018	845	2287284
Negative	Bacteria	Fusobacteria	Fusobacteriia	Fusobacteriales	Leptotrichiaceae	Leptotrichia	sp. oral taxon 215	W9775	Leptotrichia_oral_taxon_215_W9775.mat	SEQF2444	1321779	ftp://ftp.ncbi.nlm.nih.gov/genomes/all/GCF/000/469/505/GCF_000469505.1_ASM46950v1	GCF_000469505.1	209875	215	2304392
Negative	Bacteria	Fusobacteria	Fusobacteriia	Fusobacteriales	Leptotrichiaceae	Leptotrichia	sp. oral taxon 212	W10393	Leptotrichia_oral_taxon_212_W10393.mat	SEQF2748	712357	ftp://ftp.ncbi.nlm.nih.gov/genomes/refseq/bacteria/Leptotrichia_sp._oral_taxon_212/all_assembly_versions/GCF_001274535.1_ASM127453v1	GCF_001274535.1	external	212	2444904	manually uploaded genome, annotated with RAST
Negative	Bacteria	Fusobacteria	Fusobacteriia	Fusobacteriales	Leptotrichiaceae	Leptotrichia	hofstadii	F0254	Leptotrichia_hofstadii_F0254.mat	SEQF1601	634994	ftp://ftp.ncbi.nlm.nih.gov/genomes/all/GCF/000/162/955/GCF_000162955.1_ASM16295v1	GCF_000162955.1	2691	224	2456453
Negative	Bacteria	Fusobacteria	Fusobacteriia	Fusobacteriales	Leptotrichiaceae	Leptotrichia	sp. oral taxon 225	F0581	Leptotrichia_oral_taxon_225_F0581.mat	SEQF2452	1321774	ftp://ftp.ncbi.nlm.nih.gov/genomes/all/GCF/000/469/525/GCF_000469525.1_ASM46952v1	GCF_000469525.1	209872	225	2395883
Negative	Bacteria	Fusobacteria	Fusobacteriia	Fusobacteriales	Leptotrichiaceae	Leptotrichia	hofstadii	DSM 21651	Leptotrichia_hofstadii_DSM_21651.mat	SEQF2581	1122171	ftp://ftp.ncbi.nlm.nih.gov/genomes/all/GCF/000/428/965/GCF_000428965.1_ASM42896v1	GCF_000428965.1	207180	224	2553025
Negative	Bacteria	Fusobacteria	Fusobacteriia	Fusobacteriales	Leptotrichiaceae	Leptotrichia	sp. oral taxon 879	F0557	Leptotrichia_oral_taxon_879_F0557.mat	SEQF2353	1227268	ftp://ftp.ncbi.nlm.nih.gov/genomes/all/GCF/000/469/385/GCF_000469385.1_ASM46938v1	GCF_000469385.1	208203	879	2405650
Negative	Bacteria	Fusobacteria	Fusobacteriia	Fusobacteriales	Leptotrichiaceae	Leptotrichia	shahii	DSM 19757	Leptotrichia_shahii_DSM_19757.mat	SEQF2501	1122172	ftp://ftp.ncbi.nlm.nih.gov/genomes/all/GCF/000/373/045/GCF_000373045.1_ASM37304v1	GCF_000373045.1	29627	214	2144001
Negative	Bacteria	Fusobacteria	Fusobacteriia	Fusobacteriales	Leptotrichiaceae	Leptotrichia	wadei	DSM 19758	Leptotrichia_wadei_DSM_19758.mat	SEQF2502	1122174	ftp://ftp.ncbi.nlm.nih.gov/genomes/all/GCF/000/373/345/GCF_000373345.1_ASM37334v1	GCF_000373345.1	29628	222	2314249
Positive	Bacteria	Firmicutes	Bacilli	Lactobacillales	Lactobacillaceae	Lactobacillus	reuteri genosp. 1	JCM 1112, F275	Lactobacillus_reuteri_JCM_1112.mat	SEQF1121	299033	ftp://ftp.ncbi.nlm.nih.gov/genomes/refseq/bacteria/Lactobacillus_reuteri/representative/GCF_000016825.1_ASM1682v1	GCF_000016825.1	2300	818	2039414
Positive	Bacteria	Firmicutes	Bacilli	Lactobacillales	Streptococcaceae	Streptococcus	sobrinus	TCI-107	Streptococcus_sobrinus_TCI-107.mat	SEQF2247	1074066	ftp://ftp.ncbi.nlm.nih.gov/genomes/all/GCF/000/228/065/GCF_000228065.1_SMUT1-NEX_34-107	GCF_000228065.1	23782	768	2136893
Positive	Bacteria	Firmicutes	Bacilli	Lactobacillales	Lactobacillaceae	Lactobacillus	vaginalis	ATCC 49540	Lactobacillus_vaginalis_ATCC_49540.mat	SEQF1783	525366	ftp://ftp.ncbi.nlm.nih.gov/genomes/refseq/bacteria/Lactobacillus_vaginalis/representative/GCF_000159435.1_ASM15943v1	GCF_000159435.1	2018	51	1877332
Positive	Bacteria	Firmicutes	Bacilli	Lactobacillales	Lactobacillaceae	Lactobacillus	oris	PB013-T2-3	Lactobacillus_oris_PB013-T2-3.mat	SEQF1910	908339	ftp://ftp.ncbi.nlm.nih.gov/genomes/all/GCF/000/180/015/GCF_000180015.1_ASM18001v1	GCF_000180015.1	3676	709	2115990
Positive	Bacteria	Firmicutes	Bacilli	Lactobacillales	Lactobacillaceae	Lactobacillus	rhamnosus	GG	Lactobacillus_rhamnosus_GG.mat	SEQF1717	568703	ftp://ftp.ncbi.nlm.nih.gov/genomes/all/GCF/000/011/045/GCF_000011045.1_ASM1104v1	GCF_000011045.1	2404	749	3010111
Positive	Bacteria	Firmicutes	Bacilli	Lactobacillales	Lactobacillaceae	Lactobacillus	casei	BL23	Lactobacillus_casei_BL23.mat	SEQF1246	543734	ftp://ftp.ncbi.nlm.nih.gov/genomes/all/GCF/000/026/485/GCF_000026485.1_ASM2648v1	GCF_000026485.1	2165	568	3079196
Positive	Bacteria	Firmicutes	Bacilli	Lactobacillales	Lactobacillaceae	Lactobacillus	paracasei		Lactobacillus_paracasei_paracasei_8700---2.mat	SEQF1262	537973	ftp://ftp.ncbi.nlm.nih.gov/genomes/all/GCF/000/155/515/GCF_000155515.2_ASM15551v2	GCF_000155515.2	2157	716	3001787
Positive	Bacteria	Firmicutes	Bacilli	Lactobacillales	Lactobacillaceae	Lactobacillus	coleohominis	101-4-CHN	Lactobacillus_coleohominis_101-4-CHN.mat	SEQF1922	575594	ftp://ftp.ncbi.nlm.nih.gov/genomes/all/GCF/000/161/935/GCF_000161935.1_ASM16193v1	GCF_000161935.1	2455	816	1725829
Positive	Bacteria	Firmicutes	Bacilli	Lactobacillales	Lactobacillaceae	Lactobacillus	fermentum	IFO 3956	Lactobacillus_fermentum_IFO_3956.mat	SEQF1533	334390	ftp://ftp.ncbi.nlm.nih.gov/genomes/all/GCF/000/010/145/GCF_000010145.1_ASM1014v1	GCF_000010145.1	926	608	2098685
Positive	Bacteria	Firmicutes	Bacilli	Lactobacillales	Lactobacillaceae	Lactobacillus	salivarius	UCC118	Lactobacillus_salivarius_UCC118.mat	SEQF1259	362948	ftp://ftp.ncbi.nlm.nih.gov/genomes/all/GCF/000/008/925/GCF_000008925.1_ASM892v1	GCF_000008925.1	1082	756	2133977
Positive	Bacteria	Firmicutes	Bacilli	Lactobacillales	Carnobacteriaceae	Granulicatella	elegans	ATCC 700633	Granulicatella_elegans_ATCC_700633.mat	SEQF1608	626369	ftp://ftp.ncbi.nlm.nih.gov/genomes/all/GCF/000/162/475/GCF_000162475.2_Gran_ele_ATCC_700633_V2	GCF_000162475.2	2649	596	1900014
Positive	Bacteria	Firmicutes	Bacilli	Lactobacillales	Carnobacteriaceae	Dolosigranulum	pigrum	ATCC 51524	Dolosigranulum_pigrum_ATCC_51524.mat	SEQF2059	883103	ftp://ftp.ncbi.nlm.nih.gov/genomes/all/GCF/000/245/815/GCF_000245815.1_Dolo_pigr_ATCC_51524_V1	GCF_000245815.1	28026	813	1846028
Positive	Bacteria	Firmicutes	Bacilli	Lactobacillales	Streptococcaceae	Streptococcus	agalactiae	NEM316	Streptococcus_agalactiae_NEM316.mat	SEQF1338	211110	ftp://ftp.ncbi.nlm.nih.gov/genomes/all/GCF/000/196/055/GCF_000196055.1_ASM19605v1	GCF_000196055.1	370	537	2211485
Positive	Bacteria	Firmicutes	Bacilli	Lactobacillales	Streptococcaceae	Streptococcus	pyogenes	MGAS10270	Streptococcus_pyogenes_MGAS10270.mat	SEQF1356	370552	ftp://ftp.ncbi.nlm.nih.gov/genomes/all/GCF/000/013/505/GCF_000013505.1_ASM1350v1	GCF_000013505.1	1108	745	1928252
Positive	Bacteria	Firmicutes	Bacilli	Lactobacillales	Streptococcaceae	Streptococcus	pyogenes	NZ131	Streptococcus_pyogenes_NZ131.mat	SEQF1494	471876	ftp://ftp.ncbi.nlm.nih.gov/genomes/all/GCF/000/018/125/GCF_000018125.1_ASM1812v1	GCF_000018125.1	1702	745	1815785
Positive	Bacteria	Firmicutes	Bacilli	Lactobacillales	Streptococcaceae	Streptococcus	constellatus	subsp. pharyngis SK1060	Streptococcus_constellatus_pharyngis_SK1060.mat	SEQF2211	1035184	ftp://ftp.ncbi.nlm.nih.gov/genomes/all/GCF/000/474/135/GCF_000474135.1_ASM47413v1	GCF_000474135.1	23362	576	1963771
Positive	Bacteria	Firmicutes	Bacilli	Lactobacillales	Streptococcaceae	Streptococcus	intermedius	F0413	Streptococcus_intermedius_F0413.mat	SEQF1703	883167	ftp://ftp.ncbi.nlm.nih.gov/genomes/all/GCF/000/234/035/GCF_000234035.1_Stre_inte_F0413_V1	GCF_000234035.1	28051	644	1921347
Positive	Bacteria	Firmicutes	Bacilli	Lactobacillales	Streptococcaceae	Streptococcus	intermedius	JTH08	Streptococcus_intermedius_JTH08.mat	SEQF2361	591365	ftp://ftp.ncbi.nlm.nih.gov/genomes/all/GCF/000/306/805/GCF_000306805.1_ASM30680v1	GCF_000306805.1	27005	644	1933610
Positive	Bacteria	Firmicutes	Bacilli	Lactobacillales	Streptococcaceae	Streptococcus	sp. oral taxon 056	F0418	Streptococcus_oral_taxon_056_F0418.mat	SEQF1847	904294	ftp://ftp.ncbi.nlm.nih.gov/genomes/all/GCF/000/220/065/GCF_000220065.1_ASM22006v1	GCF_000220065.1	28240	56	1943250
Positive	Bacteria	Firmicutes	Bacilli	Lactobacillales	Enterococcaceae	Enterococcus	italicus	DSM 15952	Enterococcus_italicus_DSM_15952.mat	SEQF2019	888064	ftp://ftp.ncbi.nlm.nih.gov/genomes/all/GCF/000/185/365/GCF_000185365.1_ASM18536v1	GCF_000185365.1	3599	803	2415788
Positive	Bacteria	Firmicutes	Bacilli	Lactobacillales	Streptococcaceae	Streptococcus	anginosus	CCUG 39159	Streptococcus_anginosus_CCUG_39159.mat	SEQF2334	1095729	ftp://ftp.ncbi.nlm.nih.gov/genomes/all/GCF/000/257/765/GCF_000257765.1_ASM25776v1	GCF_000257765.1	24157	543	2294730
Positive	Bacteria	Firmicutes	Bacilli	Lactobacillales	Streptococcaceae	Streptococcus	anginosus	SK52	Streptococcus_anginosus_SK52.mat	SEQF1996	1000570	ftp://ftp.ncbi.nlm.nih.gov/genomes/all/GCF/000/214/555/GCF_000214555.1_ASM21455v1	GCF_000214555.1	5	543	1892386
Positive	Bacteria	Firmicutes	Bacilli	Lactobacillales	Streptococcaceae	Streptococcus	infantis	ATCC BAA-102	Streptococcus_infantarius_infantarius_ATCC_BAA-102.mat	SEQF1924	471872	ftp://ftp.ncbi.nlm.nih.gov/genomes/all/GCF/000/154/985/GCF_000154985.1_ASM15498v1	GCF_000154985.1	1699	638	1925187
Positive	Bacteria	Firmicutes	Bacilli	Lactobacillales	Streptococcaceae	Streptococcus	sp. oral taxon 066	F0442	Streptococcus_oral_taxon_066_F0442.mat	SEQF1889	999425	ftp://ftp.ncbi.nlm.nih.gov/genomes/all/GCF/000/314/795/GCF_000314795.2_Strept_sp_F0442_V1	GCF_000314795.2	28938	66	2224000
Positive	Bacteria	Firmicutes	Bacilli	Lactobacillales	Streptococcaceae	Streptococcus	australis	ATCC 700641	Streptococcus_australis_ATCC_700641.mat	SEQF2020	888833	ftp://ftp.ncbi.nlm.nih.gov/genomes/all/GCF/000/186/465/GCF_000186465.1_ASM18646v1	GCF_000186465.1	3629	73	2129953
Positive	Bacteria	Firmicutes	Bacilli	Lactobacillales	Streptococcaceae	Streptococcus	parasanguinis I	ATCC 15912	Streptococcus_parasanguinis_ATCC_15912.mat	SEQF1919	760570	ftp://ftp.ncbi.nlm.nih.gov/genomes/all/GCF/000/164/675/GCF_000164675.2_ASM16467v2	GCF_000164675.2	3258	721	2159948
Positive	Bacteria	Firmicutes	Bacilli	Lactobacillales	Streptococcaceae	Streptococcus	mutans	UA159, ATCC 700610	Streptococcus_mutans_UA_159.mat	SEQF1069	210007	ftp://ftp.ncbi.nlm.nih.gov/genomes/all/GCF/000/007/465/GCF_000007465.2_ASM746v2	GCF_000007465.2	368	686	2030921
Positive	Bacteria	Firmicutes	Bacilli	Lactobacillales	Streptococcaceae	Streptococcus	downei	F0415	Streptococcus_downei_F0415.mat	SEQF1846	904293	ftp://ftp.ncbi.nlm.nih.gov/genomes/refseq/bacteria/Streptococcus_downei/all_assembly_versions/suppressed/GCF_000180055.1_ASM18005v1	GCF_000180055.1	3653	594	2239421
Positive	Bacteria	Firmicutes	Bacilli	Lactobacillales	Streptococcaceae	Streptococcus	salivarius	SK126	Streptococcus_salivarius_SK126.mat	SEQF1843	596322	ftp://ftp.ncbi.nlm.nih.gov/genomes/all/GCF/000/174/715/GCF_000174715.1_ASM17471v1	GCF_000174715.1	2607	755	2128332
Positive	Bacteria	Firmicutes	Bacilli	Lactobacillales	Streptococcaceae	Streptococcus	parasanguinis II	F0405	Streptococcus_parasanguinis_II_F0405.mat	SEQF1702	905067	ftp://ftp.ncbi.nlm.nih.gov/genomes/all/GCF/000/180/035/GCF_000180035.1_ASM18003v1	GCF_000180035.1	3665	411	2050302
Positive	Bacteria	Firmicutes	Bacilli	Lactobacillales	Streptococcaceae	Streptococcus	salivarius	CCHSS3, JIM8780	Streptococcus_salivarius_JIM8780.mat	SEQF1367	1081659	Not Found	[]	26458	755	2217184
Positive	Bacteria	Firmicutes	Bacilli	Lactobacillales	Streptococcaceae	Streptococcus	vestibularis	F0396	Streptococcus_vestibularis_F0396.mat	SEQF1705	904306	ftp://ftp.ncbi.nlm.nih.gov/genomes/all/GCF/000/180/075/GCF_000180075.1_ASM18007v1	GCF_000180075.1	3655	21	2022289
Positive	Bacteria	Firmicutes	Bacilli	Lactobacillales	Streptococcaceae	Streptococcus	dentisani	SK95	Streptococcus_mitis_biovar_2_SK95.mat	SEQF1999	1000588	ftp://ftp.ncbi.nlm.nih.gov/genomes/all/GCF/000/222/705/GCF_000222705.1_ASM22270v2	GCF_000222705.1	23051	398	2020730
Positive	Bacteria	Firmicutes	Bacilli	Lactobacillales	Streptococcaceae	Streptococcus	peroris	ATCC 700780	Streptococcus_peroris_ATCC_700780.mat	SEQF2000	888746	ftp://ftp.ncbi.nlm.nih.gov/genomes/all/GCF/000/187/585/GCF_000187585.1_ASM18758v1	GCF_000187585.1	3605	728	1639920
Positive	Bacteria	Firmicutes	Bacilli	Lactobacillales	Streptococcaceae	Streptococcus	sp. oral taxon 058	F0407	Streptococcus_oral_taxon_058_F0407.mat	SEQF1704	861455	ftp://ftp.ncbi.nlm.nih.gov/genomes/all/GCF/000/235/485/GCF_000235485.1_ASM23548v1	GCF_000235485.1	27836	58	1847468
Positive	Bacteria	Firmicutes	Bacilli	Lactobacillales	Streptococcaceae	Streptococcus	mitis	B6	Streptococcus_mitis_B6.mat	SEQF1067	365659	ftp://ftp.ncbi.nlm.nih.gov/genomes/all/GCF/000/027/165/GCF_000027165.1_ASM2716v1	GCF_000027165.1	1090	677	2146611
Positive	Bacteria	Firmicutes	Bacilli	Lactobacillales	Streptococcaceae	Streptococcus	mitis	ATCC 6249	Streptococcus_mitis_ATCC_6249.mat	SEQF1998	864567	ftp://ftp.ncbi.nlm.nih.gov/genomes/all/GCF/000/146/585/GCF_000146585.1_ASM14658v1	GCF_000146585.1	3450	677	1915891
Positive	Bacteria	Firmicutes	Bacilli	Lactobacillales	Streptococcaceae	Streptococcus	pneumoniae	AP200	Streptococcus_pneumoniae_AP200.mat	SEQF1929	574093	ftp://ftp.ncbi.nlm.nih.gov/genomes/all/GCF/000/146/975/GCF_000146975.1_ASM14697v1	GCF_000146975.1	2440	734	2130580
Positive	Bacteria	Firmicutes	Bacilli	Lactobacillales	Streptococcaceae	Streptococcus	oralis	ATCC 35037, SK23, NCTC11427	Streptococcus_oralis_ATCC_35037.mat	SEQF1917	655813	ftp://ftp.ncbi.nlm.nih.gov/genomes/all/GCF/000/148/565/GCF_000148565.1_ASM14856v1	GCF_000148565.1	2791	707	1884712
Positive	Bacteria	Firmicutes	Bacilli	Lactobacillales	Streptococcaceae	Streptococcus	oralis	Uo5	Streptococcus_oralis_Uo5.mat	SEQF2005	927666	ftp://ftp.ncbi.nlm.nih.gov/genomes/all/GCF/000/253/155/GCF_000253155.1_ASM25315v1	GCF_000253155.1	3717	707	1958690
Positive	Bacteria	Firmicutes	Bacilli	Lactobacillales	Streptococcaceae	Streptococcus	infantis	X	Streptococcus_infantis_X.mat	SEQF2216	997830	ftp://ftp.ncbi.nlm.nih.gov/genomes/all/GCF/000/223/335/GCF_000223335.1_ASM22333v2	GCF_000223335.1	28906	638	1869505
Positive	Bacteria	Firmicutes	Bacilli	Lactobacillales	Streptococcaceae	Streptococcus	mitis	NCTC 12261	Streptococcus_mitis_NCTC_12261.mat	SEQF1068	246201	ftp://ftp.ncbi.nlm.nih.gov/genomes/all/GCF/000/148/585/GCF_000148585.1_ASM14858v1	GCF_000148585.1	510	677	2045857
Positive	Bacteria	Firmicutes	Bacilli	Lactobacillales	Streptococcaceae	Streptococcus	sp. oral taxon 070	F0441	Streptococcus_oral_taxon_070_F0441.mat	SEQF1888	999424	ftp://ftp.ncbi.nlm.nih.gov/genomes/all/GCF/000/314/775/GCF_000314775.2_Strept_sp_F0441_V1	GCF_000314775.2	28937	70	1981149
Positive	Bacteria	Firmicutes	Bacilli	Lactobacillales	Streptococcaceae	Streptococcus	tigurinus	73H25AP, F0408	Streptococcus_oral_taxon_071_73H25AP.mat	SEQF1913	864570	ftp://ftp.ncbi.nlm.nih.gov/genomes/all/GCF/000/146/755/GCF_000146755.1_ASM14675v1	GCF_000146755.1	3453	71	1976523
Negative	Bacteria	Proteobacteria	Alphaproteobacteria	Caulobacterales	Caulobacteraceae	Brevundimonas	diminuta	470-4, ATCC 13184	Brevundimonas_diminuta_470-4.mat	SEQF1892	1035191	ftp://ftp.ncbi.nlm.nih.gov/genomes/all/GCF/000/318/405/GCF_000318405.1_ASM31840v1	GCF_000318405.1	29103	590	3335922
Negative	Bacteria	Proteobacteria	Alphaproteobacteria	Caulobacterales	Caulobacteraceae	Brevundimonas	diminuta	ATCC 11568	Brevundimonas_diminuta_ATCC_11568.mat	SEQF2056	751586	ftp://ftp.ncbi.nlm.nih.gov/genomes/all/GCF/000/204/035/GCF_000204035.1_ASM20403v1	GCF_000204035.1	27521	590	3240481
Negative	Bacteria	Actinobacteria	Actinobacteria	Actinomycetales	Micrococcaceae	Rothia	mucilaginosa	ATCC 25296	Rothia_mucilaginosa_ATCC_25296.mat	SEQF1039	553201	ftp://ftp.ncbi.nlm.nih.gov/genomes/all/GCF/000/175/615/GCF_000175615.1_ASM17561v1	GCF_000175615.1	2251	681	2255158
Negative	Bacteria	Actinobacteria	Actinobacteria	Actinomycetales	Micrococcaceae	Rothia	mucilaginosa	DY-18	Rothia_mucilaginosa_DY-18.mat	SEQF1724	43675	ftp://ftp.ncbi.nlm.nih.gov/genomes/all/GCF/001/060/545/GCF_001060545.1_ASM106054v1	GCF_001060545.1	2950	681	2264603
Negative	Bacteria	Actinobacteria	Actinobacteria	Actinomycetales	Micrococcaceae	Rothia	aeria	F0474	Rothia_aeria_F0474.mat	SEQF1901	1125724	ftp://ftp.ncbi.nlm.nih.gov/genomes/all/GCF/000/258/205/GCF_000258205.1_RaeriaF0474v1.0	GCF_000258205.1	24422	188	2584293
Negative	Bacteria	Actinobacteria	Actinobacteria	Actinomycetales	Micrococcaceae	Rothia	dentocariosa	M567	Rothia_dentocariosa_M567.mat	SEQF1994	563032	ftp://ftp.ncbi.nlm.nih.gov/genomes/all/GCF/000/143/585/GCF_000143585.1_ASM14358v1	GCF_000143585.1	2337	587	2532787
Negative	Bacteria	Actinobacteria	Actinobacteria	Actinomycetales	Actinomycetaceae	Actinobaculum	sp. oral taxon 183	F0552	Actinobaculum_P1_oral_taxon_183_F0552.mat	SEQF2310	1227261	ftp://ftp.ncbi.nlm.nih.gov/genomes/all/GCF/000/466/165/GCF_000466165.1_ASM46616v1	GCF_000466165.1	208199	183	2357424
Negative	Bacteria	Actinobacteria	Actinobacteria	Actinomycetales	Actinomycetaceae	Actinomyces	gerencseriae	DSM 6844	Actinomyces_gerencseriae_DSM_6844.mat	SEQF2575	1120943	ftp://ftp.ncbi.nlm.nih.gov/genomes/all/GCF/000/429/265/GCF_000429265.1_ASM42926v1	GCF_000429265.1	207007	618	3418708
Negative	Bacteria	Actinobacteria	Actinobacteria	Actinomycetales	Actinomycetaceae	Actinomyces	sp. oral taxon 448	F0400	Actinomyces_oral_taxon_448_F0400.mat	SEQF1701	888056	ftp://ftp.ncbi.nlm.nih.gov/genomes/all/GCF/000/220/835/GCF_000220835.1_ASM22083v1	GCF_000220835.1	28138	448	2801370
Negative	Bacteria	Actinobacteria	Actinobacteria	Corynebacteriales	Corynebacteriaceae	Corynebacterium	matruchotii	ATCC 33806	Corynebacterium_matruchotii_ATCC_33806.mat	SEQF1648	566549	ftp://ftp.ncbi.nlm.nih.gov/genomes/all/GCF/000/158/635/GCF_000158635.1_ASM15863v1	GCF_000158635.1	2399	666	2992255
Negative	Bacteria	Actinobacteria	Actinobacteria	Corynebacteriales	Corynebacteriaceae	Corynebacterium	durum	F0235	Corynebacterium_durum_F0235.mat	SEQF1897	1035195	ftp://ftp.ncbi.nlm.nih.gov/genomes/all/GCF/000/318/135/GCF_000318135.1_ASM31813v1	GCF_000318135.1	29106	595	2809096
Positive	Bacteria	Actinobacteria	Actinobacteria	Corynebacteriales	Corynebacteriaceae	Corynebacterium	diphtheriae	NCTC 13129	Corynebacterium_diphtheriae_NCTC_13129.mat	SEQF1184	257309	ftp://ftp.ncbi.nlm.nih.gov/genomes/all/GCF/000/195/815/GCF_000195815.1_ASM19581v1	GCF_000195815.1	523	591	2488635
Negative	Bacteria	Actinobacteria	Actinobacteria	Corynebacteriales	Corynebacteriaceae	Turicella	otitidis	ATCC 51513	Turicella_otitidis_ATCC_51513.mat	SEQF2407	883169	ftp://ftp.ncbi.nlm.nih.gov/genomes/all/GCF/000/296/405/GCF_000296405.1_Turi_otit_ATCC_51513_V1	GCF_000296405.1	28053	832	2090523
Negative	Bacteria	Actinobacteria	Actinobacteria	Corynebacteriales	Corynebacteriaceae	Corynebacterium	urealyticum	DSM 7109	Corynebacterium_urealyticum_DSM_7109.mat	SEQF1976	504474	ftp://ftp.ncbi.nlm.nih.gov/genomes/all/GCF/000/069/945/GCF_000069945.1_ASM6994v1	GCF_000069945.1	1846	853	2369219
Negative	Bacteria	Actinobacteria	Actinobacteria	Actinomycetales	Actinomycetaceae	Actinomyces	graevenitzii	C83	Actinomyces_graevenitzii_C83.mat	SEQF2031	435830	ftp://ftp.ncbi.nlm.nih.gov/genomes/all/GCF/000/239/695/GCF_000239695.1_Acti_grae_C83_V1	GCF_000239695.1	26676	866	2196917
Positive	Bacteria	Firmicutes	Bacilli	Lactobacillales	Enterococcaceae	Enterococcus	casseliflavus	14-MB-W-14	Enterococcus_casseliflavus_14-MB-W-14.mat	SEQF2549	1259825	ftp://ftp.ncbi.nlm.nih.gov/genomes/all/GCF/000/414/945/GCF_000414945.1_ASM41494v1	GCF_000414945.1	208454	801	3652198
Positive	Bacteria	Firmicutes	Bacilli	Bacillales	Bacillaceae	Bacillus	clausii	KSM-K16	Bacillus_clausii_KSM-K16.mat	SEQF1170	66692	ftp://ftp.ncbi.nlm.nih.gov/genomes/all/GCF/000/009/825/GCF_000009825.1_ASM982v1	GCF_000009825.1	2880	45	4303871
Negative	Bacteria	Actinobacteria	Actinobacteria	Actinomycetales	Actinomycetaceae	Actinomyces	dentalis	DSM 19115	Actinomyces_dentalis_DSM_19115.mat	SEQF2573	1120941	ftp://ftp.ncbi.nlm.nih.gov/genomes/all/GCF/000/429/225/GCF_000429225.1_ASM42922v1	GCF_000429225.1	207005	888	3529652
Negative	Bacteria	Actinobacteria	Actinobacteria	Actinomycetales	Actinomycetaceae	Actinomyces	sp. oral taxon 414	F0588	Actinomyces_oral_taxon_414_F0592.mat	SEQF2745	712122	ftp://ftp.ncbi.nlm.nih.gov/genomes/refseq/bacteria/Actinomyces_sp._oral_taxon_414/all_assembly_versions/GCF_001278845.1_ASM127884v1	GCF_001278845.1	external	414	3836419	manually uploaded genome, annotated with RAST
Negative	Bacteria	Actinobacteria	Actinobacteria	Actinomycetales	Actinomycetaceae	Actinomyces	israelii	DSM 43320	Actinomyces_israelii_DSM_43320.mat	SEQF2705	1120944	ftp://ftp.ncbi.nlm.nih.gov/genomes/all/GCF/000/711/965/GCF_000711965.1_ASM71196v1	GCF_000711965.1	239675	645	4024065
Positive	Bacteria	Actinobacteria	Actinobacteria	Actinomycetales	Actinomycetaceae	Actinomyces	timonensis	DSM 23838	Actinomyces_timonensis_DSM_23838.mat	SEQF2594	521393	ftp://ftp.ncbi.nlm.nih.gov/genomes/all/GCF/000/295/095/GCF_000295095.1_ASM29509v1	GCF_000295095.1	26849	179	2913054	Name changed (Actinomyces sp. 7400942)
Negative	Bacteria	Actinobacteria	Actinobacteria	Bifidobacteriales	Bifidobacteriaceae	Alloscardovia	omnicolens	DSM 21503	Alloscardovia_omnicolens_DSM_21503.mat	SEQF2547	1120979	ftp://ftp.ncbi.nlm.nih.gov/genomes/all/GCF/000/420/505/GCF_000420505.1_ASM42050v1	GCF_000420505.1	207027	198	1847146
Negative	Bacteria	Actinobacteria	Actinobacteria	Bifidobacteriales	Bifidobacteriaceae	Bifidobacterium	subtile	DSM 20096	Bifidobacterium_subtile_DSM_20096.mat	SEQF2577	1121110	ftp://ftp.ncbi.nlm.nih.gov/genomes/all/GCF/000/426/405/GCF_000426405.1_ASM42640v1	GCF_000426405.1	207064	890	2765266
Positive	Bacteria	Actinobacteria	Actinobacteria	Bifidobacteriales	Bifidobacteriaceae	Bifidobacterium	animalis	CNCM I-2494	Bifidobacterium_animalis_lactis_CNCM_I-2494.mat	SEQF2464	1042403	ftp://ftp.ncbi.nlm.nih.gov/genomes/all/GCF/000/220/885/GCF_000220885.1_ASM22088v1	GCF_000220885.1	23406	895	1943113
Negative	Bacteria	Actinobacteria	Actinobacteria	Bifidobacteriales	Bifidobacteriaceae	Bifidobacterium	dentium	ATCC 27678	Bifidobacterium_dentium_ATCC_27678.mat	SEQF1497	473819	ftp://ftp.ncbi.nlm.nih.gov/genomes/all/GCF/000/172/135/GCF_000172135.1_ASM17213v1	GCF_000172135.1	1706	588	2642081
Positive	Bacteria	Actinobacteria	Actinobacteria	Bifidobacteriales	Bifidobacteriaceae	Bifidobacterium	animalis	HN019	Bifidobacterium_animalis_lactis_HN019.mat	SEQF2475	486409	ftp://ftp.ncbi.nlm.nih.gov/genomes/all/GCF/000/172/535/GCF_000172535.1_Blac_1.0	GCF_000172535.1	1770	895	1915892
Negative	Bacteria	Actinobacteria	Actinobacteria	Bifidobacteriales	Bifidobacteriaceae	Bifidobacterium	longum	subsp. longum ATCC 55813	Bifidobacterium_longum_longum_ATCC_55813.mat	SEQF1952	548480	ftp://ftp.ncbi.nlm.nih.gov/genomes/all/GCF/000/003/135/GCF_000003135.1_ASM313v1	GCF_000003135.1	2216	862	2396359
Negative	Bacteria	Actinobacteria	Actinobacteria	Bifidobacteriales	Bifidobacteriaceae	Bifidobacterium	longum	subsp. infantis ATCC 15697	Bifidobacterium_longum_infantis_ATCC_15697.mat	SEQF2249	391904	ftp://ftp.ncbi.nlm.nih.gov/genomes/all/GCF/000/020/425/GCF_000020425.1_ASM2042v1	GCF_000020425.1	1220	862	2832748
Negative	Bacteria	Actinobacteria	Actinobacteria	Bifidobacteriales	Bifidobacteriaceae	Bifidobacterium	breve	CECT 7263	Bifidobacterium_breve_CECT_7263.mat	SEQF2413	1036735	ftp://ftp.ncbi.nlm.nih.gov/genomes/all/GCF/000/247/755/GCF_000247755.1_ASM24775v2	GCF_000247755.1	23374	889	2314396
Positive	Bacteria	Actinobacteria	Actinobacteria	Bifidobacteriales	Bifidobacteriaceae	Bifidobacterium	breve	UCC2003	Bifidobacterium_breve_UCC2003.mat	SEQF2426	326426	ftp://ftp.ncbi.nlm.nih.gov/genomes/all/GCF/000/220/135/GCF_000220135.1_ASM22013v1	GCF_000220135.1	26358	889	2422684
Negative	Bacteria	Actinobacteria	Actinobacteria	Propionibacteriales	Propionibacteriaceae	Propionibacterium	sp. oral taxon 192	F0372	Propionibacterium_oral_taxon_192_F0372.mat	SEQF1972	1203605	ftp://ftp.ncbi.nlm.nih.gov/genomes/all/GCF/000/413/315/GCF_000413315.1_Prop_sp_oral_taxon_192_F0372_V1	GCF_000413315.1	31100	192	2704051
Negative	Bacteria	Actinobacteria	Actinobacteria	Actinomycetales	Dermacoccaceae	Kytococcus	sedentarius	DSM 20547	Kytococcus_sedentarius_DSM_20547.mat	SEQF1978	478801	ftp://ftp.ncbi.nlm.nih.gov/genomes/all/GCF/000/023/925/GCF_000023925.1_ASM2392v1	GCF_000023925.1	1725	855	2785024
Positive	Bacteria	Actinobacteria	Actinobacteria	Actinomycetales	Actinomycetaceae	Actinomyces	georgiae	DSM 6843	Actinomyces_georgiae_DSM_6843.mat	SEQF2574	1120942	ftp://ftp.ncbi.nlm.nih.gov/genomes/all/GCF/000/429/245/GCF_000429245.1_ASM42924v1	GCF_000429245.1	207006	617	2493023
Positive	Bacteria	Firmicutes	Bacilli	Lactobacillales	Enterococcaceae	Enterococcus	casseliflavus	EC30	Enterococcus_casseliflavus_EC30.mat	SEQF1734	565652	ftp://ftp.ncbi.nlm.nih.gov/genomes/all/GCF/000/157/215/GCF_000157215.1_ASM15721v1	GCF_000157215.1	2380	801	3452979
Negative	Bacteria	Actinobacteria	Actinobacteria	Actinomycetales	Actinomycetaceae	Actinomyces	viscosus	C505	Actinomyces_viscosus_C505.mat	SEQF2689	562973	ftp://ftp.ncbi.nlm.nih.gov/genomes/all/GCF/000/175/315/GCF_000175315.3_Acti_vis_C505_V3	GCF_000175315.3	2332	688	3132692
Negative	Bacteria	Actinobacteria	Actinobacteria	Actinomycetales	Actinomycetaceae	Actinomyces	sp. oral taxon 175	F0384	Actinomyces_oral_taxon_175_F0384.mat	SEQF1848	944560	ftp://ftp.ncbi.nlm.nih.gov/genomes/all/GCF/000/223/355/GCF_000223355.1_ASM22335v1	GCF_000223355.1	28498	175	3133330
Negative	Bacteria	Actinobacteria	Actinobacteria	Actinomycetales	Actinomycetaceae	Actinomyces	naeslundii	MG1	Actinomyces_naeslundii_MG1.mat	SEQF1063	240017	ftp://ftp.ncbi.nlm.nih.gov/genomes/all/GCF/000/285/995/GCF_000285995.1_AneasH279v1.0	GCF_000285995.1	24325	176	3114341	not found (strain "str. Howell 279" also in HOMD used as replacement)
Negative	Bacteria	Actinobacteria	Actinobacteria	Actinomycetales	Actinomycetaceae	Actinomyces	sp. oral taxon 171	F0337	Actinomyces_oral_taxon_171_F0337.mat	SEQF1693	706439	ftp://ftp.ncbi.nlm.nih.gov/genomes/all/GCF/000/186/965/GCF_000186965.1_ASM18696v1	GCF_000186965.1	27426	171	3006255
Negative	Bacteria	Actinobacteria	Actinobacteria	Actinomycetales	Actinomycetaceae	Actinomyces	johnsonii	F0330	Actinomyces_johnsonii_F0330.mat	SEQF1668	653386	ftp://ftp.ncbi.nlm.nih.gov/genomes/all/GCF/000/239/715/GCF_000239715.1_Actinomyces_sp_F0330_V1	GCF_000239715.1	27084	849	3345061
Negative	Bacteria	Actinobacteria	Actinobacteria	Actinomycetales	Actinomycetaceae	Actinomyces	massiliensis		Actinomyces_massiliensis_4401292.mat	SEQF2385	1167628	ftp://ftp.ncbi.nlm.nih.gov/genomes/all/GCF/000/269/805/GCF_000269805.1_ASM26980v1	GCF_000269805.1	25040	852	3348548
Negative	Bacteria	Actinobacteria	Actinobacteria	Actinomycetales	Actinomycetaceae	Actinomyces	oris	K20	Actinomyces_oris_K20.mat	SEQF2431	871541	ftp://ftp.ncbi.nlm.nih.gov/genomes/all/GCF/000/180/155/GCF_000180155.1_ASM18015v1	GCF_000180155.1	27961	893	2872429
Negative	Bacteria	Actinobacteria	Actinobacteria	Actinomycetales	Actinomycetaceae	Actinomyces	sp. oral taxon 170	F0386	Actinomyces_oral_taxon_170_F0386.mat	SEQF1849	762963	ftp://ftp.ncbi.nlm.nih.gov/genomes/all/GCF/000/195/595/GCF_000195595.1_ASM19559v1	GCF_000195595.1	3276	170	3135160
Negative	Bacteria	Actinobacteria	Actinobacteria	Actinomycetales	Actinomycetaceae	Actinobaculum	sp. oral taxon 848	F0332	Actinomyces_oral_taxon_848_F0332.mat	SEQF1660	649743	ftp://ftp.ncbi.nlm.nih.gov/genomes/all/GCF/000/162/895/GCF_000162895.1_ASM16289v1	GCF_000162895.1	2774	848	2520418
Positive	Bacteria	Actinobacteria	Actinobacteria	Actinomycetales	Actinomycetaceae	Actinomyces	cardiffensis	F0333	Actinomyces_cardiffensis_F0333.mat	SEQF1667	888050	ftp://ftp.ncbi.nlm.nih.gov/genomes/all/GCF/000/364/865/GCF_000364865.1_ASM36486v1	GCF_000364865.1	32379	850	2188900
Negative	Bacteria	Actinobacteria	Actinobacteria	Micrococcales	Microbacteriaceae	Microbacterium	flavescens	F0373	Microbacterium_oral_taxon_186_F0373.mat	SEQF1971	1203549	ftp://ftp.ncbi.nlm.nih.gov/genomes/all/GCF/000/411/455/GCF_000411455.1_Micr_sp_oral_taxon_186_F0373_V1	GCF_000411455.1	31088	186	3164554
Positive	Bacteria	Actinobacteria	Actinobacteria	Actinomycetales	Actinomycetaceae	Actinomyces	sp. oral taxon 172	F0311	Actinomyces_oral_taxon_172_F0311.mat	SEQF2430	1321775	ftp://ftp.ncbi.nlm.nih.gov/genomes/all/GCF/000/466/265/GCF_000466265.1_ASM46626v1	GCF_000466265.1	209873	172	2462190
Positive	Bacteria	Actinobacteria	Actinobacteria	Actinomycetales	Actinomycetaceae	Actinomyces	odontolyticus	ATCC 17982, DSM 43331	Actinomyces_odontolyticus_ATCC_17982.mat	SEQF1388	411466	ftp://ftp.ncbi.nlm.nih.gov/genomes/all/GCF/000/154/225/GCF_000154225.1_ASM15422v1	GCF_000154225.1	1361	701	2393958
Positive	Bacteria	Actinobacteria	Actinobacteria	Actinomycetales	Actinomycetaceae	Actinomyces	odontolyticus	XH001	Actinomyces_odontolyticus_XH001.mat	SEQF2804	1660	ftp://ftp.ncbi.nlm.nih.gov/genomes/refseq/bacteria/Actinomyces_odontolyticus/all_assembly_versions/GCF_001462375.1_ASM146237v1	GCF_001462375.1	external	701	2336123	manually uploaded genome, annotated with RAST
Positive	Bacteria	Actinobacteria	Actinobacteria	Actinomycetales	Actinomycetaceae	Actinomyces	sp. oral taxon 178	F0338	Actinomyces_oral_taxon_178_F0338.mat	SEQF1666	888051	ftp://ftp.ncbi.nlm.nih.gov/genomes/all/GCF/000/186/685/GCF_000186685.1_ASM18668v1	GCF_000186685.1	3592	178	2817106
Positive	Bacteria	Actinobacteria	Actinobacteria	Actinomycetales	Actinomycetaceae	Actinomyces	sp. oral taxon 877	F0543	Actinomyces_oral_taxon_877_F0543.mat	SEQF2313	1227264	ftp://ftp.ncbi.nlm.nih.gov/genomes/all/GCF/000/466/305/GCF_000466305.1_ASM46630v1	GCF_000466305.1	208201	877	2712944
Positive	Bacteria	Actinobacteria	Actinobacteria	Actinomycetales	Actinomycetaceae	Actinomyces	georgiae	F0490	Actinomyces_georgiae_F0490.mat	SEQF1902	1125717	ftp://ftp.ncbi.nlm.nih.gov/genomes/all/GCF/000/277/685/GCF_000277685.1_AgeorgiaeF0490v1.0	GCF_000277685.1	24415	617	2477360
Negative	Bacteria	Actinobacteria	Actinobacteria	Propionibacteriales	Propionibacteriaceae	Propionibacterium	acidifaciens	DSM 21887	Propionibacterium_acidifaciens_DSM_21887.mat	SEQF2583	1122994	ftp://ftp.ncbi.nlm.nih.gov/genomes/all/GCF/000/426/605/GCF_000426605.1_ASM42660v1	GCF_000426605.1	207243	191	3043431
Negative	Bacteria	Actinobacteria	Actinobacteria	Propionibacteriales	Propionibacteriaceae	Propionibacterium	acnes	SK137	Propionibacterium_acnes_SK137.mat	SEQF1014	553199	ftp://ftp.ncbi.nlm.nih.gov/genomes/all/GCF/000/025/765/GCF_000025765.1_ASM2576v1	GCF_000025765.1	2250	530	2495334
Negative	Bacteria	Actinobacteria	Actinobacteria	Actinomycetales	Actinomycetaceae	Actinomyces	massiliensis	F0489	Actinomyces_massiliensis_F0489.mat	SEQF1903	1125718	ftp://ftp.ncbi.nlm.nih.gov/genomes/all/GCF/000/296/275/GCF_000296275.1_AmassiliensisF0489v1.0	GCF_000296275.1	24416	852	3416440
Negative	Bacteria	Actinobacteria	Actinobacteria	Propionibacteriales	Propionibacteriaceae	Propionibacterium	avidum	ATCC 25577	Propionibacterium_avidum_ATCC_25577.mat	SEQF1990	997355	ftp://ftp.ncbi.nlm.nih.gov/genomes/all/GCF/000/227/295/GCF_000227295.1_ASM22729v1	GCF_000227295.1	28901	552	2533496
Negative	Bacteria	Actinobacteria	Actinobacteria	Micrococcales	Sanguibacteraceae	Sanguibacter	keddieii	DSM 10542	Sanguibacter_keddieii_DSM_10542.mat	SEQF1979	446469	ftp://ftp.ncbi.nlm.nih.gov/genomes/all/GCF/000/024/925/GCF_000024925.1_ASM2492v1	GCF_000024925.1	1542	856	8491430
Negative	Bacteria	Actinobacteria	Actinobacteria	Propionibacteriales	Propionibacteriaceae	Propionibacterium	avidum		Propionibacterium_avidum_44067.mat	SEQF2522	1170318	ftp://ftp.ncbi.nlm.nih.gov/genomes/all/GCF/000/367/205/GCF_000367205.1_ASM36720v1	GCF_000367205.1	30858	552	2526138
Positive	Bacteria	Actinobacteria	Actinobacteria	Actinomycetales	Actinomycetaceae	Actinomyces	sp. oral taxon 180	F0310	Actinomyces_oral_taxon_180_F0310.mat	SEQF1647	888052	ftp://ftp.ncbi.nlm.nih.gov/genomes/all/GCF/000/185/285/GCF_000185285.1_ASM18528v1	GCF_000185285.1	3593	180	2372658
Negative	Bacteria	Actinobacteria	Actinobacteria	Actinomycetales	Micrococcaceae	Rothia	dentocariosa	ATCC 17931	Rothia_dentocariosa_ATCC_17931.mat	SEQF1925	762948	ftp://ftp.ncbi.nlm.nih.gov/genomes/all/GCF/000/164/695/GCF_000164695.2_ASM16469v2	GCF_000164695.2	3274	587	2506025
Negative	Bacteria	Actinobacteria	Actinobacteria	Actinomycetales	Actinomycetaceae	Actinomyces	lingnae [NVP]	F0379	Actinomyces_oral_taxon_181_F0379.mat	SEQF1948	1127690	ftp://ftp.ncbi.nlm.nih.gov/genomes/all/GCF/000/318/335/GCF_000318335.2_ASM31833v2	GCF_000318335.2	29759	181	1906384
Positive	Bacteria	Actinobacteria	Actinobacteria	Actinomycetales	Actinomycetaceae	Mobiluncus	mulieris	ATCC 35243	Mobiluncus_mulieris_ATCC_35243.mat	SEQF1785	585199	ftp://ftp.ncbi.nlm.nih.gov/genomes/all/GCF/000/160/615/GCF_000160615.1_ASM16061v1	GCF_000160615.1	2523	830	2435166
Positive	Bacteria	Actinobacteria	Coriobacteriia	Eggerthellales	Eggerthellaceae	Cryptobacterium	curtum	DSM 15641, ATCC 700683, 12-3T	Cryptobacterium_curtum_DSM_15641.mat	SEQF1480	469378	ftp://ftp.ncbi.nlm.nih.gov/genomes/all/GCF/000/023/845/GCF_000023845.1_ASM2384v1	GCF_000023845.1	1642	579	1609698
Negative	Bacteria	Proteobacteria	Epsilonproteobacteria	Campylobacterales	Campylobacteraceae	Campylobacter	ureolyticus	DSM 20703	Campylobacter_ureolyticus_DSM_20703.mat	SEQF2614	1121102	ftp://ftp.ncbi.nlm.nih.gov/genomes/all/GCF/000/374/605/GCF_000374605.1_ASM37460v1	GCF_000374605.1	29563	842	1740135
Negative	Bacteria	Actinobacteria	Coriobacteriia	Coriobacteriales	Coriobacteriaceae	Slackia	exigua	ATCC 700122	Slackia_exigua_ATCC_700122.mat	SEQF1599	649764	ftp://ftp.ncbi.nlm.nih.gov/genomes/all/GCF/000/162/875/GCF_000162875.1_ASM16287v1	GCF_000162875.1	2778	602	2096289
Negative	Bacteria	Actinobacteria	Coriobacteriia	Coriobacteriales	Atopobiaceae	Olsenella	profusa	F0195	Olsenella_profusa_F0195.mat	SEQF1933	1125712	ftp://ftp.ncbi.nlm.nih.gov/genomes/all/GCF/000/468/755/GCF_000468755.1_OprofF0195v1.0	GCF_000468755.1	207382	806	2724935
Positive	Bacteria	Actinobacteria	Actinobacteria	Corynebacteriales	Mycobacteriaceae	Mycobacterium	neoaurum	VKM Ac-1815D	Mycobacterium_neoaurum_VKM_Ac-1815D.mat	SEQF2672	700508	ftp://ftp.ncbi.nlm.nih.gov/genomes/all/GCF/000/317/305/GCF_000317305.3_ASM31730v3	GCF_000317305.3	27409	692	5400604
Positive	Bacteria	Actinobacteria	Actinobacteria	Corynebacteriales	Mycobacteriaceae	Mycobacterium	leprae	Br4923	Mycobacterium_leprae_Br4923.mat	SEQF1645	561304	ftp://ftp.ncbi.nlm.nih.gov/genomes/all/GCF/000/026/685/GCF_000026685.1_ASM2668v1	GCF_000026685.1	2321	823	3268071
Positive	Bacteria	Actinobacteria	Actinobacteria	Corynebacteriales	Mycobacteriaceae	Mycobacterium	tuberculosis	CDC1551	Mycobacterium_tuberculosis_CDC1551.mat	SEQF1032	83331	ftp://ftp.ncbi.nlm.nih.gov/genomes/all/GCF/000/008/585/GCF_000008585.1_ASM858v1	GCF_000008585.1	3395	822	4403837
Negative	Bacteria	Firmicutes	Negativicutes	Selenomonadales	Veillonellaceae	Dialister	invisus	DSM 15470	Dialister_invisus_DSM_15470.mat	SEQF1103	592028	ftp://ftp.ncbi.nlm.nih.gov/genomes/all/GCF/000/160/055/GCF_000160055.1_ASM16005v1	GCF_000160055.1	2571	118	1895960
Negative	Bacteria	Synergistetes	Synergistia	Synergistales	Synergistaceae	Fretibacterium	fastidiosum	SGP1	Synergistetes_SGP1.mat	SEQF1674	651822	ftp://ftp.ncbi.nlm.nih.gov/genomes/refseq/bacteria/Fretibacterium_fastidiosum/all_assembly_versions/suppressed/GCF_000210715.1_ASM21071v1	GCF_000210715.1	2779	363	2728333
Negative	Bacteria	Firmicutes	Negativicutes	Selenomonadales	Veillonellaceae	Veillonella	parvula	DSM 2008, Te3, ATCC 10790, JCM 1297	Veillonella_parvula_DSM_2008.mat	SEQF1496	479436	ftp://ftp.ncbi.nlm.nih.gov/genomes/all/GCF/000/024/945/GCF_000024945.1_ASM2494v1	GCF_000024945.1	1737	161	2132142
Positive	Bacteria	Firmicutes	Negativicutes	Selenomonadales	Veillonellaceae	Veillonella	parvula	ATCC 17745	Veillonella_parvula_ATCC_17745.mat	SEQF1058	29466	ftp://ftp.ncbi.nlm.nih.gov/genomes/all/GCF/001/553/335/GCF_001553335.1_ASM155333v1	GCF_001553335.1	2971	161	2163473
Negative	Bacteria	Firmicutes	Negativicutes	Selenomonadales	Veillonellaceae	Veillonella	dispar	ATCC 17748	Veillonella_dispar_ATCC_17748.mat	SEQF1159	546273	ftp://ftp.ncbi.nlm.nih.gov/genomes/all/GCF/000/160/015/GCF_000160015.1_ASM16001v1	GCF_000160015.1	2193	160	2118767
Positive	Bacteria	Firmicutes	Negativicutes	Selenomonadales	Veillonellaceae	Veillonella	rogosae	F0412	Veillonella_oral_taxon_158_F0412.mat	SEQF1698	879309	ftp://ftp.ncbi.nlm.nih.gov/genomes/all/GCF/000/183/505/GCF_000183505.1_ASM18350v1	GCF_000183505.1	3556	158	2176752
Negative	Bacteria	Firmicutes	Negativicutes	Selenomonadales	Veillonellaceae	Veillonella	atypica	ACS-134-V-Col7a	Veillonella_atypica_ACS-134-V-Col7a.mat	SEQF1918	866778	ftp://ftp.ncbi.nlm.nih.gov/genomes/all/GCF/000/179/755/GCF_000179755.1_ASM17975v1	GCF_000179755.1	3465	524	2148918
Negative	Bacteria	Firmicutes	Negativicutes	Selenomonadales	Veillonellaceae	Veillonella	sp. oral taxon 780	F0422	Veillonella_oral_taxon_780_F0422.mat	SEQF1859	944564	ftp://ftp.ncbi.nlm.nih.gov/genomes/all/GCF/000/221/605/GCF_000221605.1_ASM22160v1	GCF_000221605.1	28500	780	1731014
Negative	Bacteria	Firmicutes	Negativicutes	Selenomonadales	Veillonellaceae	Mitsuokella	sp. oral taxon 131	W9106	Mitsuokella_oral_taxon_131_W9106.mat	SEQF2446	1321781	ftp://ftp.ncbi.nlm.nih.gov/genomes/all/GCF/000/469/545/GCF_000469545.1_ASM46954v1	GCF_000469545.1	209876	131	2312457
Negative	Bacteria	Firmicutes	Negativicutes	Selenomonadales	Veillonellaceae	Centipeda	periodontii	DSM 2778	Centipeda_periodontii_DSM_2778.mat	SEQF1958	888060	ftp://ftp.ncbi.nlm.nih.gov/genomes/all/GCF/000/213/975/GCF_000213975.1_ASM21397v1	GCF_000213975.1	3596	726	2716458
Negative	Bacteria	Firmicutes	Negativicutes	Selenomonadales	Veillonellaceae	Selenomonas	infelix	ATCC 43532	Selenomonas_infelix_ATCC_43532.mat	SEQF1673	679201	ftp://ftp.ncbi.nlm.nih.gov/genomes/all/GCF/000/234/095/GCF_000234095.1_Sele_infe_ATCC_43532_V1	GCF_000234095.1	27342	639	2409106
Negative	Bacteria	Firmicutes	Negativicutes	Selenomonadales	Veillonellaceae	Selenomonas	sp. oral taxon 892	F0426	Selenomonas_oral_taxon_892_F0426.mat	SEQF2454	1321786	ftp://ftp.ncbi.nlm.nih.gov/genomes/all/GCF/000/468/035/GCF_000468035.1_ASM46803v1	GCF_000468035.1	209879	892	2307692
Negative	Bacteria	Firmicutes	Negativicutes	Selenomonadales	Veillonellaceae	Selenomonas	sp. oral taxon 149	67H29BP, F0410	Selenomonas_oral_taxon_149_67H29BP.mat	SEQF1914	864563	ftp://ftp.ncbi.nlm.nih.gov/genomes/all/GCF/000/146/365/GCF_000146365.1_ASM14636v1	GCF_000146365.1	3446	149	2471116
Negative	Bacteria	Firmicutes	Negativicutes	Selenomonadales	Veillonellaceae	Selenomonas	artemidis	F0399	Selenomonas_artemidis_F0399.mat	SEQF1697	749551	ftp://ftp.ncbi.nlm.nih.gov/genomes/all/GCF/000/187/125/GCF_000187125.1_ASM18712v1	GCF_000187125.1	3214	124	2210307
Negative	Bacteria	Firmicutes	Negativicutes	Selenomonadales	Veillonellaceae	Selenomonas	artemidis	DSM 19719	Selenomonas_artemidis_DSM_19719.mat	SEQF2584	1123249	ftp://ftp.ncbi.nlm.nih.gov/genomes/all/GCF/000/426/665/GCF_000426665.1_ASM42666v1	GCF_000426665.1	207274	124	2350559
Negative	Bacteria	Firmicutes	Negativicutes	Selenomonadales	Veillonellaceae	Selenomonas	sp. oral taxon 137	F0430	Selenomonas_oral_taxon_137_F0430.mat	SEQF1858	879310	ftp://ftp.ncbi.nlm.nih.gov/genomes/all/GCF/000/183/625/GCF_000183625.1_ASM18362v1	GCF_000183625.1	3557	137	2475066
Negative	Bacteria	Firmicutes	Negativicutes	Selenomonadales	Veillonellaceae	Selenomonas	sp. oral taxon 133	F0473	Selenomonas_oral_taxon_133_F0473.mat	SEQF1890	999423	ftp://ftp.ncbi.nlm.nih.gov/genomes/all/GCF/000/315/545/GCF_000315545.1_Seleno_sp_F0473_V1	GCF_000315545.1	28936	133	2055819
Negative	Bacteria	Firmicutes	Negativicutes	Selenomonadales	Veillonellaceae	Selenomonas	sp. oral taxon 478	F0592	Selenomonas_oral_taxon_478_F0592.mat	SEQF2752	712538	ftp://ftp.ncbi.nlm.nih.gov/genomes/all/GCF/001/189/555/GCF_001189555.1_ASM118955v1	GCF_001189555.1	external	478	2284135	manually uploaded genome, annotated with RAST
Negative	Bacteria	Firmicutes	Negativicutes	Selenomonadales	Veillonellaceae	Selenomonas	sp. oral taxon 138	F0429	Selenomonas_oral_taxon_138_F0429.mat	SEQF1951	1127695	ftp://ftp.ncbi.nlm.nih.gov/genomes/all/GCF/000/318/175/GCF_000318175.2_ASM31817v2	GCF_000318175.2	29764	138	2387334
Negative	Bacteria	Firmicutes	Negativicutes	Selenomonadales	Veillonellaceae	Selenomonas	flueggei	ATCC 43531	Selenomonas_flueggei_ATCC_43531.mat	SEQF1616	638302	ftp://ftp.ncbi.nlm.nih.gov/genomes/all/GCF/000/160/695/GCF_000160695.1_ASM16069v1	GCF_000160695.1	2711	125	2166063
Negative	Bacteria	Firmicutes	Negativicutes	Selenomonadales	Veillonellaceae	Selenomonas	noxia	ATCC 43541	Selenomonas_noxia_ATCC_43541.mat	SEQF1593	585503	ftp://ftp.ncbi.nlm.nih.gov/genomes/all/GCF/000/160/555/GCF_000160555.1_ASM16055v1	GCF_000160555.1	2532	130	2039467
Negative	Bacteria	Firmicutes	Negativicutes	Selenomonadales	Veillonellaceae	Selenomonas	sputigena	ATCC 35185	Selenomonas_sputigena_ATCC_35185.mat	SEQF1598	546271	ftp://ftp.ncbi.nlm.nih.gov/genomes/all/GCF/000/160/495/GCF_000160495.1_ASM16049v1	GCF_000160495.1	2191	151	2568361
Negative	Bacteria	Firmicutes	Negativicutes	Selenomonadales	Veillonellaceae	Mitsuokella	multacida	DSM 20544, A 405-1, ATCC 27723, NCTC 10	Mitsuokella_multacida_DSM_20544.mat	SEQF1092	500635	ftp://ftp.ncbi.nlm.nih.gov/genomes/all/GCF/000/155/955/GCF_000155955.1_ASM15595v1	GCF_000155955.1	1832	684	2577056
Negative	Bacteria	Firmicutes	Negativicutes	Selenomonadales	Veillonellaceae	Anaeroglobus	geminatus	F0357	Anaeroglobus_geminatus_F0357.mat	SEQF1880	861450	ftp://ftp.ncbi.nlm.nih.gov/genomes/all/GCF/000/239/275/GCF_000239275.1_ASM23927v1	GCF_000239275.1	27833	121	1794202
Negative	Bacteria	Firmicutes	Negativicutes	Selenomonadales	Veillonellaceae	Megasphaera	micronuciformis	F0359	Megasphaera_micronuciformis_F0359.mat	SEQF1685	706434	ftp://ftp.ncbi.nlm.nih.gov/genomes/all/GCF/000/165/735/GCF_000165735.1_ASM16573v1	GCF_000165735.1	3056	122	1765528
Negative	Bacteria	Proteobacteria	Epsilonproteobacteria	Campylobacterales	Campylobacteraceae	Campylobacter	rectus	RM3267	Campylobacter_rectus_RM3267.mat	SEQF1575	553218	ftp://ftp.ncbi.nlm.nih.gov/genomes/all/GCF/000/174/175/GCF_000174175.1_ASM17417v1	GCF_000174175.1	2258	748	2513107
Negative	Bacteria	Proteobacteria	Epsilonproteobacteria	Campylobacterales	Campylobacteraceae	Campylobacter	concisus	strain 13826	Campylobacter_concisus_strain_13826.mat	SEQF1177	360104	ftp://ftp.ncbi.nlm.nih.gov/genomes/all/GCF/000/017/725/GCF_000017725.2_ASM1772v2	GCF_000017725.2	1064	575	2099413
Negative	Bacteria	Proteobacteria	Epsilonproteobacteria	Campylobacterales	Campylobacteraceae	Campylobacter	gracilis	RM3268	Campylobacter_gracilis_RM3268.mat	SEQF2434	553220	ftp://ftp.ncbi.nlm.nih.gov/genomes/all/GCF/000/175/875/GCF_000175875.1_ASM17587v1	GCF_000175875.1	2260	623	2255573
Negative	Bacteria	Proteobacteria	Epsilonproteobacteria	Campylobacterales	Campylobacteraceae	Campylobacter	showae	RM3277	Campylobacter_showae_RM3277.mat	SEQF1731	553219	ftp://ftp.ncbi.nlm.nih.gov/genomes/all/GCF/000/175/655/GCF_000175655.1_ASM17565v1	GCF_000175655.1	2259	763	2072007
Negative	Bacteria	Proteobacteria	Epsilonproteobacteria	Campylobacterales	Campylobacteraceae	Campylobacter	curvus		Campylobacter_curvus_525.92.mat	SEQF1178	360105	ftp://ftp.ncbi.nlm.nih.gov/genomes/all/GCF/000/017/465/GCF_000017465.2_ASM1746v2	GCF_000017465.2	1065	580	1971264
Negative	Bacteria	Proteobacteria	Epsilonproteobacteria	Campylobacterales	Campylobacteraceae	Campylobacter	showae	CSUNSWCD	Campylobacter_showae_CSUNSWCD.mat	SEQF2416	1244083	ftp://ftp.ncbi.nlm.nih.gov/genomes/all/GCF/000/313/615/GCF_000313615.1_Velvet_assembly_of_Campylobacter_showae_CSUNSWCD	GCF_000313615.1	25852	763	2125173
Negative	Bacteria	Proteobacteria	Epsilonproteobacteria	Campylobacterales	Campylobacteraceae	Campylobacter	curvus	DSM 6644	Campylobacter_curvus_DSM_6644.mat	SEQF2488	1121268	ftp://ftp.ncbi.nlm.nih.gov/genomes/all/GCF/000/376/325/GCF_000376325.1_ASM37632v1	GCF_000376325.1	29569	580	1954904
Negative	Bacteria	Proteobacteria	Gammaproteobacteria	Pasteurellales	Pasteurellaceae	Haemophilus	haemolyticus	F0397	Haemophilus_oral_taxon_851_F0397.mat	SEQF1850	762965	ftp://ftp.ncbi.nlm.nih.gov/genomes/all/GCF/000/242/295/GCF_000242295.1_ASM24229v1	GCF_000242295.1	27711	851	1837573
Negative	Bacteria	Proteobacteria	Gammaproteobacteria	Pasteurellales	Pasteurellaceae	Haemophilus	aegyptius	ATCC 11116	Haemophilus_aegyptius_ATCC_11116.mat	SEQF1963	888728	ftp://ftp.ncbi.nlm.nih.gov/genomes/all/GCF/000/195/005/GCF_000195005.1_ASM19500v1	GCF_000195005.1	3601	535	1915025
Negative	Bacteria	Proteobacteria	Gammaproteobacteria	Pasteurellales	Pasteurellaceae	Haemophilus	influenzae	PittGG	Haemophilus_influenzae_PittGG.mat	SEQF1232	374931	ftp://ftp.ncbi.nlm.nih.gov/genomes/refseq/bacteria/Haemophilus_influenzae/all_assembly_versions/suppressed/GCF_000016485.1_ASM1648v1	GCF_000016485.1	1126	641	1887192
Negative	Bacteria	Proteobacteria	Alphaproteobacteria	Rhodobacterales	Rhodobacteraceae	Rhodobacter	capsulatus	SB 1003	Rhodobacter_capsulatus_SB_1003.mat	SEQF1980	272942	ftp://ftp.ncbi.nlm.nih.gov/genomes/all/GCF/000/021/865/GCF_000021865.1_ASM2186v1	GCF_000021865.1	628	857	3871920
Negative	Bacteria	Proteobacteria	Alphaproteobacteria	Rhizobiales	Bradyrhizobiaceae	Bradyrhizobium	elkanii		Bradyrhizobium_elkanii_587.mat	SEQF2325	1156987	ftp://ftp.ncbi.nlm.nih.gov/genomes/all/GCF/000/257/685/GCF_000257685.2_BelkAss1.0	GCF_000257685.2	24929	597	8678542
Negative	Bacteria	Proteobacteria	Gammaproteobacteria	Pasteurellales	Pasteurellaceae	Haemophilus	haemolyticus	M21639	Haemophilus_haemolyticus_M21639.mat	SEQF2076	1028806	ftp://ftp.ncbi.nlm.nih.gov/genomes/all/GCF/000/222/085/GCF_000222085.1_ASM22208v2	GCF_000222085.1	23312	851	2328161
Negative	Bacteria	Proteobacteria	Alphaproteobacteria	Rhizobiales	Bradyrhizobiaceae	Afipia	broomeae	ATCC 49717	Afipia_broomeae_ATCC_49717.mat	SEQF2411	883078	ftp://ftp.ncbi.nlm.nih.gov/genomes/all/GCF/000/314/675/GCF_000314675.2_Afip_broo_ATCC_49717_V1	GCF_000314675.2	28018	559	5259998
Negative	Bacteria	Proteobacteria	Alphaproteobacteria	Rhizobiales	Bradyrhizobiaceae	Bradyrhizobium	elkanii	USDA 76	Bradyrhizobium_elkanii_USDA_76.mat	SEQF2487	398525	ftp://ftp.ncbi.nlm.nih.gov/genomes/all/GCF/000/379/145/GCF_000379145.1_ASM37914v1	GCF_000379145.1	32186	597	9482467
Negative	Bacteria	Proteobacteria	Gammaproteobacteria	Pseudomonadales	Moraxellaceae	Acinetobacter	baumannii	AB0057	Acinetobacter_baumannii_AB0057.mat	SEQF1485	480119	ftp://ftp.ncbi.nlm.nih.gov/genomes/all/GCF/000/021/245/GCF_000021245.1_ASM2124v1	GCF_000021245.1	1744	554	4059242
Negative	Bacteria	Proteobacteria	Alphaproteobacteria	Rhizobiales	Rhizobiaceae	Mesorhizobium	loti	MAFF303099	Mesorhizobium_loti_MAFF303099.mat	SEQF1025	266835	ftp://ftp.ncbi.nlm.nih.gov/genomes/all/GCF/000/009/625/GCF_000009625.1_ASM962v1	GCF_000009625.1	571	659	7596300
Negative	Bacteria	Proteobacteria	Betaproteobacteria	Burkholderiales	Comamonadaceae	Comamonas	testosteroni	KF-1	Comamonas_testosteroni_KF-1.mat	SEQF1981	399795	ftp://ftp.ncbi.nlm.nih.gov/genomes/all/GCF/000/168/855/GCF_000168855.1_ASM16885v1	GCF_000168855.1	1288	858	6026527
Negative	Bacteria	Proteobacteria	Betaproteobacteria	Burkholderiales	Burkholderiaceae	Ralstonia	pickettii	12D	Ralstonia_pickettii_12D.mat	SEQF1977	428406	ftp://ftp.ncbi.nlm.nih.gov/genomes/all/GCF/000/023/425/GCF_000023425.1_ASM2342v1	GCF_000023425.1	1436	854	5685358
Negative	Bacteria	Proteobacteria	Gammaproteobacteria	Pseudomonadales	Pseudomonadaceae	Pseudomonas	stutzeri	A1501, CGMCC 0351	Pseudomonas_stutzeri_A1501.mat	SEQF1303	379731	ftp://ftp.ncbi.nlm.nih.gov/genomes/all/GCF/000/013/785/GCF_000013785.1_ASM1378v1	GCF_000013785.1	1147	477	4567418
Negative	Bacteria	Proteobacteria	Gammaproteobacteria	Pseudomonadales	Pseudomonadaceae	Pseudomonas	otitidis		Pseudomonas_otitidis.mat	SEQF2695	319939	ftp://ftp.ncbi.nlm.nih.gov/genomes/all/GCF/000/632/755/GCF_000632755.1_PseOti1.0	GCF_000632755.1	242457	834	6296878
Negative	Bacteria	Proteobacteria	Gammaproteobacteria	Pseudomonadales	Moraxellaceae	Moraxella	catarrhalis	RH4	Moraxella_catarrhalis_RH4.mat	SEQF1102	749219	ftp://ftp.ncbi.nlm.nih.gov/genomes/all/GCF/000/302/495/GCF_000302495.1_RH4.0	GCF_000302495.1	3162	833	1863286
Negative	Bacteria	Proteobacteria	Betaproteobacteria	Neisseriales	Neisseriaceae	Kingella	oralis	ATCC 51147	Kingella_oralis_ATCC_51147.mat	SEQF1594	629741	ftp://ftp.ncbi.nlm.nih.gov/genomes/all/GCF/000/160/435/GCF_000160435.1_ASM16043v1	GCF_000160435.1	2656	706	2406675
Negative	Bacteria	Proteobacteria	Betaproteobacteria	Neisseriales	Neisseriaceae	Eikenella	corrodens	ATCC 23834	Eikenella_corrodens_ATCC_23834.mat	SEQF1016	546274	ftp://ftp.ncbi.nlm.nih.gov/genomes/all/GCF/000/158/615/GCF_000158615.1_ASM15861v1	GCF_000158615.1	2194	577	2171245
Negative	Bacteria	Proteobacteria	Betaproteobacteria	Neisseriales	Neisseriaceae	Neisseria	bacilliformis	ATCC BAA-1200	Neisseria_bacilliformis_ATCC_BAA-1200.mat	SEQF1969	888742	ftp://ftp.ncbi.nlm.nih.gov/genomes/all/GCF/000/194/925/GCF_000194925.1_ASM19492v1	GCF_000194925.1	3603	13	2434769
Negative	Bacteria	Proteobacteria	Betaproteobacteria	Neisseriales	Neisseriaceae	Neisseria	sp. oral taxon 020	F0370	Neisseria_oral_taxon_020_F0370.mat	SEQF1944	1127694	ftp://ftp.ncbi.nlm.nih.gov/genomes/all/GCF/000/318/235/GCF_000318235.2_ASM31823v2	GCF_000318235.2	29763	20	2361870
Negative	Bacteria	Proteobacteria	Gammaproteobacteria	Cardiobacteriales	Cardiobacteriaceae	Cardiobacterium	hominis	ATCC 15826	Cardiobacterium_hominis_ATCC_15826.mat	SEQF1604	638300	ftp://ftp.ncbi.nlm.nih.gov/genomes/all/GCF/000/160/655/GCF_000160655.1_ASM16065v1	GCF_000160655.1	2709	633	2642494
Negative	Bacteria	Proteobacteria	Gammaproteobacteria	Cardiobacteriales	Cardiobacteriaceae	Cardiobacterium	valvarum	F0432	Cardiobacterium_valvarum_F0432.mat	SEQF1860	797473	ftp://ftp.ncbi.nlm.nih.gov/genomes/all/GCF/000/239/355/GCF_000239355.1_ASM23935v1	GCF_000239355.1	27792	540	2547857
Negative	Bacteria	Proteobacteria	Gammaproteobacteria	Xanthomonadales	Xanthomonadaceae	Stenotrophomonas	maltophilia	K279a	Stenotrophomonas_maltophilia_K279a.mat	SEQF1329	522373	ftp://ftp.ncbi.nlm.nih.gov/genomes/all/GCF/000/072/485/GCF_000072485.1_ASM7248v1	GCF_000072485.1	1966	663	4851126
Negative	Bacteria	Proteobacteria	Betaproteobacteria	Neisseriales	Neisseriaceae	Neisseria	sicca	ATCC 29256	Neisseria_sicca_ATCC_29256.mat	SEQF1264	547045	ftp://ftp.ncbi.nlm.nih.gov/genomes/all/GCF/000/174/655/GCF_000174655.1_ASM17465v1	GCF_000174655.1	2202	764	2830772
Negative	Bacteria	Proteobacteria	Betaproteobacteria	Neisseriales	Neisseriaceae	Kingella	kingae	ATCC 23330	Kingella_kingae_ATCC_23330.mat	SEQF2080	887327	ftp://ftp.ncbi.nlm.nih.gov/genomes/all/GCF/000/213/535/GCF_000213535.1_ASM21353v1	GCF_000213535.1	3586	646	1916770
Negative	Bacteria	Proteobacteria	Betaproteobacteria	Neisseriales	Neisseriaceae	Neisseria	meningitidis	MC58	Neisseria_meningitidis_MC58.mat	SEQF1276	122586	ftp://ftp.ncbi.nlm.nih.gov/genomes/all/GCF/000/008/805/GCF_000008805.1_ASM880v1	GCF_000008805.1	104	669	2272360
Negative	Bacteria	Proteobacteria	Betaproteobacteria	Neisseriales	Neisseriaceae	Neisseria	weaveri	ATCC 51223	Neisseria_weaveri_ATCC_51223.mat	SEQF2330	1051972	ftp://ftp.ncbi.nlm.nih.gov/genomes/all/GCF/000/224/275/GCF_000224275.1_ASM22427v2	GCF_000224275.1	23570	92	2125582
Negative	Bacteria	Proteobacteria	Betaproteobacteria	Neisseriales	Neisseriaceae	Simonsiella	muelleri	ATCC 29453	Simonsiella_muelleri_ATCC_29453.mat	SEQF1652	641147	ftp://ftp.ncbi.nlm.nih.gov/genomes/all/GCF/000/163/775/GCF_000163775.2_Simo_muel_ATCC_29453_V2	GCF_000163775.2	2729	683	2412952
Negative	Bacteria	Proteobacteria	Betaproteobacteria	Neisseriales	Neisseriaceae	Neisseria	gonorrhoeae	NCCP11945	Neisseria_gonorrhoeae_NCCP11945.mat	SEQF1109	521006	ftp://ftp.ncbi.nlm.nih.gov/genomes/all/GCF/000/020/105/GCF_000020105.1_ASM2010v1	GCF_000020105.1	1950	621	2236178
Negative	Bacteria	Proteobacteria	Betaproteobacteria	Neisseriales	Neisseriaceae	Neisseria	meningitidis	ATCC 13091	Neisseria_meningitidis_ATCC_13091.mat	SEQF1916	862513	ftp://ftp.ncbi.nlm.nih.gov/genomes/all/GCF/000/146/655/GCF_000146655.1_ASM14665v1	GCF_000146655.1	3433	669	2262611
Negative	Bacteria	Proteobacteria	Betaproteobacteria	Neisseriales	Neisseriaceae	Neisseria	lactamica	020-06	Neisseria_lactamica_020-06.mat	SEQF2159	489653	ftp://ftp.ncbi.nlm.nih.gov/genomes/all/GCF/000/196/295/GCF_000196295.1_ASM19629v1	GCF_000196295.1	1790	649	2220606
Negative	Bacteria	Proteobacteria	Betaproteobacteria	Neisseriales	Neisseriaceae	Neisseria	lactamica	ATCC 23970	Neisseria_lactamica_ATCC_23970.mat	SEQF1261	546265	ftp://ftp.ncbi.nlm.nih.gov/genomes/all/GCF/000/173/995/GCF_000173995.1_ASM17399v1	GCF_000173995.1	2184	649	2171992
Negative	Bacteria	Proteobacteria	Betaproteobacteria	Neisseriales	Neisseriaceae	Neisseria	oralis	F0314	Neisseria_oral_taxon_014_F0314.mat	SEQF1659	641149	ftp://ftp.ncbi.nlm.nih.gov/genomes/all/GCF/000/090/875/GCF_000090875.1_ASM9087v1	GCF_000090875.1	2730	14	2515760
Negative	Bacteria	Proteobacteria	Betaproteobacteria	Neisseriales	Neisseriaceae	Neisseria	elongata	ATCC 29315	Neisseria_elongata_ATCC_29315.mat	SEQF1166	546263	ftp://ftp.ncbi.nlm.nih.gov/genomes/all/GCF/000/176/755/GCF_000176755.2_ASM17675v1	GCF_000176755.2	2182	598	2337411
Negative	Bacteria	Proteobacteria	Betaproteobacteria	Neisseriales	Neisseriaceae	Neisseria	mucosa	ATCC 25996	Neisseria_mucosa_ATCC_25996.mat	SEQF1175	546266	ftp://ftp.ncbi.nlm.nih.gov/genomes/all/GCF/000/173/875/GCF_000173875.1_ASM17387v1	GCF_000173875.1	2185	682	2578748
Negative	Bacteria	Proteobacteria	Betaproteobacteria	Neisseriales	Neisseriaceae	Neisseria	subflava	NJ9703	Neisseria_subflava_NJ9703.mat	SEQF1165	546268	ftp://ftp.ncbi.nlm.nih.gov/genomes/all/GCF/000/173/955/GCF_000173955.1_ASM17395v1	GCF_000173955.1	2187	476	2292986
Negative	Bacteria	Proteobacteria	Betaproteobacteria	Neisseriales	Neisseriaceae	Kingella	denitrificans	ATCC 33394	Kingella_denitrificans_ATCC_33394.mat	SEQF2079	888741	ftp://ftp.ncbi.nlm.nih.gov/genomes/all/GCF/000/190/695/GCF_000190695.1_ASM19069v1	GCF_000190695.1	3602	582	2220455
Negative	Bacteria	Proteobacteria	Betaproteobacteria	Neisseriales	Neisseriaceae	Neisseria	flavescens	NRL30031/H210	Neisseria_flavescens_NRL30031_H210.mat	SEQF1195	546264	ftp://ftp.ncbi.nlm.nih.gov/genomes/all/GCF/000/173/935/GCF_000173935.1_ASM17393v1	GCF_000173935.1	2183	610	2205588
Negative	Bacteria	Proteobacteria	Betaproteobacteria	Neisseriales	Neisseriaceae	Neisseria	gonorrhoeae	DGI2	Neisseria_gonorrhoeae_DGI2.mat	SEQF1794	528348	ftp://ftp.ncbi.nlm.nih.gov/genomes/all/GCF/000/159/935/GCF_000159935.1_ASM15993v1	GCF_000159935.1	2112	621	2093927
Negative	Bacteria	Proteobacteria	Betaproteobacteria	Neisseriales	Neisseriaceae	Neisseria	polysaccharea	ATCC 43768	Neisseria_polysaccharea_ATCC_43768.mat	SEQF1183	546267	ftp://ftp.ncbi.nlm.nih.gov/genomes/all/GCF/000/176/735/GCF_000176735.1_ASM17673v1	GCF_000176735.1	2186	737	2030958
Negative	Bacteria	Proteobacteria	Gammaproteobacteria	Xanthomonadales	Xanthomonadaceae	Stenotrophomonas	maltophilia	R551-3	Stenotrophomonas_maltophilia_R551-3.mat	SEQF1330	391008	ftp://ftp.ncbi.nlm.nih.gov/genomes/all/GCF/000/020/665/GCF_000020665.1_ASM2066v1	GCF_000020665.1	1188	663	4573969
Positive	Bacteria	Firmicutes	Bacilli	Bacillales	Paenibacillaceae	Paenibacillus	phoenicis	D14	Paenibacillus_oral_taxon_786_D14.mat	SEQF1658	621372	ftp://ftp.ncbi.nlm.nih.gov/genomes/all/GCF/000/159/955/GCF_000159955.1_ASM15995v1	GCF_000159955.1	2640	786	5097411
Negative	Bacteria	Proteobacteria	Gammaproteobacteria	Pasteurellales	Pasteurellaceae	Aggregatibacter	actinomycetemcomitans	D17P-2	Aggregatibacter_actinomycetemcomitans_D17P-2.mat	SEQF1954	754506	ftp://ftp.ncbi.nlm.nih.gov/genomes/all/GCF/000/241/005/GCF_000241005.2_AaD17P-2v2.0	GCF_000241005.2	27555	531	2162657
Negative	Bacteria	Proteobacteria	Gammaproteobacteria	Pasteurellales	Pasteurellaceae	Aggregatibacter	actinomycetemcomitans	HK1651	Aggregatibacter_actinomycetemcomitans_HK1651.mat	SEQF1074	272556	ftp://ftp.ncbi.nlm.nih.gov/genomes/all/GCF/000/604/045/GCF_000604045.1_ASM60404v1	GCF_000604045.1	244838	531	2105503
Negative	Bacteria	Proteobacteria	Gammaproteobacteria	Pasteurellales	Pasteurellaceae	Aggregatibacter	sp. oral taxon 458	W10330	Aggregatibacter_oral_taxon_458_W10330.mat	SEQF2445	1321772	ftp://ftp.ncbi.nlm.nih.gov/genomes/all/GCF/000/466/335/GCF_000466335.1_ASM46633v1	GCF_000466335.1	209870	458	2010124
Negative	Bacteria	Proteobacteria	Gammaproteobacteria	Pasteurellales	Pasteurellaceae	Aggregatibacter	aphrophilus	NJ8700	Aggregatibacter_aphrophilus_NJ8700.mat	SEQF1221	634176	ftp://ftp.ncbi.nlm.nih.gov/genomes/all/GCF/000/022/985/GCF_000022985.1_ASM2298v1	GCF_000022985.1	2675	545	2313035
Negative	Bacteria	Proteobacteria	Betaproteobacteria	Burkholderiales	Burkholderiaceae	Lautropia	mirabilis	ATCC 51599	Lautropia_mirabilis_ATCC_51599.mat	SEQF1967	887898	ftp://ftp.ncbi.nlm.nih.gov/genomes/all/GCF/000/186/425/GCF_000186425.1_ASM18642v1	GCF_000186425.1	3587	22	3151925
Negative	Bacteria	Proteobacteria	Gammaproteobacteria	Enterobacteriales	Enterobacteriaceae	Klebsiella	pneumoniae	NTUH-K2044	Klebsiella_pneumoniae_NTUH-K2044.mat	SEQF1715	484021	ftp://ftp.ncbi.nlm.nih.gov/genomes/all/GCF/000/009/885/GCF_000009885.1_ASM988v1	GCF_000009885.1	1756	731	5248520
Negative	Bacteria	Proteobacteria	Gammaproteobacteria	Pseudomonadales	Pseudomonadaceae	Pseudomonas	fluorescens	Pf0-1	Pseudomonas_fluorescens_Pf0-1.mat	SEQF1301	205922	ftp://ftp.ncbi.nlm.nih.gov/genomes/all/GCF/000/012/445/GCF_000012445.1_ASM1244v1	GCF_000012445.1	354	612	6438405
Negative	Bacteria	Proteobacteria	Gammaproteobacteria	Pseudomonadales	Pseudomonadaceae	Pseudomonas	fluorescens	Pf-5	Pseudomonas_fluorescens_Pf-5.mat	SEQF1300	220664	ftp://ftp.ncbi.nlm.nih.gov/genomes/all/GCF/000/012/265/GCF_000012265.1_ASM1226v1	GCF_000012265.1	410	612	7074893
Negative	Bacteria	Proteobacteria	Gammaproteobacteria	Pseudomonadales	Pseudomonadaceae	Pseudomonas	aeruginosa	LESB58	Pseudomonas_aeruginosa_LESB58.mat	SEQF1619	557722	ftp://ftp.ncbi.nlm.nih.gov/genomes/all/GCF/000/026/645/GCF_000026645.1_ASM2664v1	GCF_000026645.1	2306	536	6601757
Negative	Bacteria	Proteobacteria	Gammaproteobacteria	Pseudomonadales	Pseudomonadaceae	Pseudomonas	pseudoalcaligenes	KF707	Pseudomonas_pseudoalcaligenes_KF707.mat	SEQF2352	1149133	ftp://ftp.ncbi.nlm.nih.gov/genomes/all/GCF/000/262/065/GCF_000262065.2_KF707_a1	GCF_000262065.2	24679	740	6923434
Negative	Bacteria	Proteobacteria	Gammaproteobacteria	Enterobacteriales	Enterobacteriaceae	Escherichia	coli	BW2952	Escherichia_coli_BW2952.mat	SEQF1713	595496	ftp://ftp.ncbi.nlm.nih.gov/genomes/all/GCF/000/022/345/GCF_000022345.1_ASM2234v1	GCF_000022345.1	2590	574	4578159
Negative	Bacteria	Proteobacteria	Gammaproteobacteria	Enterobacteriales	Enterobacteriaceae	Escherichia	coli	O157:H7 str. EC4115	Escherichia_coli_O157---H7_EC4115.mat	SEQF1511	444450	ftp://ftp.ncbi.nlm.nih.gov/genomes/all/GCF/000/021/125/GCF_000021125.1_ASM2112v1	GCF_000021125.1	1511	574	5704171
Negative	Bacteria	Proteobacteria	Gammaproteobacteria	Pasteurellales	Pasteurellaceae	Haemophilus	parainfluenzae	ATCC 33392	Haemophilus_parainfluenzae_ATCC_33392.mat	SEQF2077	888828	ftp://ftp.ncbi.nlm.nih.gov/genomes/all/GCF/000/191/405/GCF_000191405.1_ASM19140v1	GCF_000191405.1	3627	718	2124757
Negative	Bacteria	Proteobacteria	Gammaproteobacteria	Pasteurellales	Pasteurellaceae	Aggregatibacter	segnis	ATCC 33393	Aggregatibacter_segnis_ATCC_33393.mat	SEQF1957	888057	ftp://ftp.ncbi.nlm.nih.gov/genomes/all/GCF/000/185/305/GCF_000185305.1_ASM18530v1	GCF_000185305.1	3594	762	2012010
Negative	Bacteria	Proteobacteria	Gammaproteobacteria	Pasteurellales	Pasteurellaceae	Haemophilus	parainfluenzae	T3T1	Haemophilus_parainfluenzae_T3T1.mat	SEQF1239	862965	ftp://ftp.ncbi.nlm.nih.gov/genomes/all/GCF/000/210/895/GCF_000210895.1_ASM21089v1	GCF_000210895.1	3441	718	2086875
Negative	Bacteria	Proteobacteria	Gammaproteobacteria	Enterobacteriales	Enterobacteriaceae	Proteus	mirabilis	ATCC 29906	Proteus_mirabilis_ATCC_29906.mat	SEQF1802	525369	ftp://ftp.ncbi.nlm.nih.gov/genomes/all/GCF/000/160/755/GCF_000160755.1_ASM16075v1	GCF_000160755.1	2021	676	4027100
Negative	Bacteria	Proteobacteria	Gammaproteobacteria	Enterobacteriales	Enterobacteriaceae	Enterobacter	cancerogenus	ATCC 35316	Enterobacter_cancerogenus_ATCC_35316.mat	SEQF1481	500639	ftp://ftp.ncbi.nlm.nih.gov/genomes/all/GCF/000/155/995/GCF_000155995.1_ASM15599v1	GCF_000155995.1	1835	565	4638653
Negative	Bacteria	Proteobacteria	Gammaproteobacteria	Enterobacteriales	Enterobacteriaceae	Cronobacter	sakazakii	ATCC BAA-894	Cronobacter_sakazakii_ATCC_BAA-894.mat	SEQF1185	290339	ftp://ftp.ncbi.nlm.nih.gov/genomes/all/GCF/000/017/665/GCF_000017665.1_ASM1766v1	GCF_000017665.1	683	753	4530777
Negative	Bacteria	Proteobacteria	Gammaproteobacteria	Enterobacteriales	Enterobacteriaceae	Yersinia	pestis	KIM D27	Yersinia_pestis_KIM_D27.mat	SEQF1844	687916	Not Found	[]	2972	827	4681648
Negative	Bacteria	Proteobacteria	Gammaproteobacteria	Enterobacteriales	Enterobacteriaceae	Proteus	mirabilis	HI4320	Proteus_mirabilis_HI4320.mat	SEQF1289	529507	ftp://ftp.ncbi.nlm.nih.gov/genomes/all/GCF/000/069/965/GCF_000069965.1_ASM6996v1	GCF_000069965.1	2496	676	4036696
Negative	Bacteria	Proteobacteria	Gammaproteobacteria	Enterobacteriales	Enterobacteriaceae	Enterobacter	hormaechei	ATCC 49162	Enterobacter_hormaechei_ATCC_49162.mat	SEQF1960	888063	ftp://ftp.ncbi.nlm.nih.gov/genomes/all/GCF/000/213/995/GCF_000213995.1_ASM21399v1	GCF_000213995.1	3598	634	4806970
Negative	Bacteria	Proteobacteria	Gammaproteobacteria	Enterobacteriales	Enterobacteriaceae	Yersinia	pestis	Antiqua JGI	Yersinia_pestis_Antiqua_JGI.mat	SEQF1054	360102	ftp://ftp.ncbi.nlm.nih.gov/genomes/all/GCF/000/013/825/GCF_000013825.1_ASM1382v1	GCF_000013825.1	1063	827	4879836
Negative	Bacteria	Proteobacteria	Betaproteobacteria	Burkholderiales	Burkholderiaceae	Burkholderia	cepacia	GG4	Burkholderia_cepacia_GG4.mat	SEQF2408	1009846	ftp://ftp.ncbi.nlm.nih.gov/genomes/all/GCF/000/292/915/GCF_000292915.1_ASM29291v1	GCF_000292915.1	23290	571	6467321
Negative	Bacteria	Proteobacteria	Alphaproteobacteria	Rhizobiales	Brucellaceae	Ochrobactrum	anthropi	ATCC 49188	Ochrobactrum_anthropi_ATCC_49188.mat	SEQF1457	439375	ftp://ftp.ncbi.nlm.nih.gov/genomes/all/GCF/000/017/405/GCF_000017405.1_ASM1740v1	GCF_000017405.1	1468	544	5205777
Negative	Bacteria	Proteobacteria	Alphaproteobacteria	Rhizobiales	Rhizobiaceae	Agrobacterium	tumefaciens	str. C58, ATCC 33970	Agrobacterium_tumefaciens_C58.mat	SEQF1167	176299	ftp://ftp.ncbi.nlm.nih.gov/genomes/all/GCF/000/092/025/GCF_000092025.1_ASM9202v1	GCF_000092025.1	166	485	5674258
Negative	Bacteria	Proteobacteria	Betaproteobacteria	Burkholderiales	Comamonadaceae	Variovorax	paradoxus	S110	Variovorax_paradoxus_S110.mat	SEQF1395	543728	ftp://ftp.ncbi.nlm.nih.gov/genomes/all/GCF/000/023/345/GCF_000023345.1_ASM2334v1	GCF_000023345.1	2164	717	6754997
Negative	Bacteria	Proteobacteria	Betaproteobacteria	Burkholderiales	Comamonadaceae	Delftia	acidovorans	SPH-1, ATCC15668	Delftia_acidovorans_SPH-1.mat	SEQF1413	398578	ftp://ftp.ncbi.nlm.nih.gov/genomes/all/GCF/000/018/665/GCF_000018665.1_ASM1866v1	GCF_000018665.1	1274	23	6767514
Positive	Bacteria	Firmicutes	Bacilli	Lactobacillales	Streptococcaceae	Streptococcus	oligofermentans	AS 1.3089	Streptococcus_oligofermentans_AS_1.3089.mat	SEQF2520	1302863	ftp://ftp.ncbi.nlm.nih.gov/genomes/all/GCF/000/385/925/GCF_000385925.1_ASM38592v1	GCF_000385925.1	31933	886	2142100
Positive	Bacteria	Firmicutes	Bacilli	Lactobacillales	Streptococcaceae	Streptococcus	cristatus	ATCC 51100	Streptococcus_cristatus_ATCC_51100.mat	SEQF1997	889201	ftp://ftp.ncbi.nlm.nih.gov/genomes/all/GCF/000/187/855/GCF_000187855.1_ASM18785v1	GCF_000187855.1	3631	578	1982490
Positive	Bacteria	Firmicutes	Bacilli	Lactobacillales	Streptococcaceae	Streptococcus	gordonii	Challis CH1, ATCC 35105, NCTC7868	Streptococcus_gordonii_Challis_CH1.mat	SEQF1066	467705	ftp://ftp.ncbi.nlm.nih.gov/genomes/all/GCF/000/017/005/GCF_000017005.1_ASM1700v1	GCF_000017005.1	1638	622	2196662
Negative	Bacteria	Proteobacteria	Betaproteobacteria	Burkholderiales	Alcaligenaceae	Achromobacter	xylosoxidans	A8	Achromobacter_xylosoxidans_A8.mat	SEQF1926	762376	ftp://ftp.ncbi.nlm.nih.gov/genomes/all/GCF/000/165/835/GCF_000165835.1_ASM16583v1	GCF_000165835.1	3268	343	7359146
Negative	Bacteria	Proteobacteria	Betaproteobacteria	Burkholderiales	Alcaligenaceae	Bordetella	pertussis	Tohama I, ATCC BAA-589, NCTC-13251	Bordetella_pertussis_Tohama_I.mat	SEQF1086	257313	ftp://ftp.ncbi.nlm.nih.gov/genomes/all/GCF/000/195/715/GCF_000195715.1_ASM19571v1	GCF_000195715.1	526	828	4086189
Positive	Bacteria	Firmicutes	Bacilli	Lactobacillales	Streptococcaceae	Streptococcus	sanguinis	SK36	Streptococcus_sanguinis_SK36.mat	SEQF1070	1305	ftp://ftp.ncbi.nlm.nih.gov/genomes/all/GCF/001/071/805/GCF_001071805.1_ASM107180v1	GCF_001071805.1	1182	758	2388435
Positive	Bacteria	Firmicutes	Bacilli	Bacillales	Bacillaceae	Lysinibacillus	fusiformis	ZC1	Lysinibacillus_fusiformis_ZC1.mat	SEQF1920	714961	ftp://ftp.ncbi.nlm.nih.gov/genomes/all/GCF/000/178/135/GCF_000178135.1_ASM17813v1	GCF_000178135.1	27450	614	4649417
Negative	Bacteria	Bacteroidetes	Bacteroidia	Bacteroidales	Porphyromonadaceae	Porphyromonas	endodontalis	ATCC 35406	Porphyromonas_endodontalis_ATCC_35406.mat	SEQF1033	553175	ftp://ftp.ncbi.nlm.nih.gov/genomes/all/GCF/000/174/815/GCF_000174815.1_ASM17481v1	GCF_000174815.1	2242	273	2064508
Positive	Bacteria	Firmicutes	Bacilli	Bacillales	Gemellaceae	Gemella	bergeri	ATCC 700627	Gemella_bergeriae_ATCC_700627.mat	SEQF2460	1321820	ftp://ftp.ncbi.nlm.nih.gov/genomes/all/GCF/000/469/465/GCF_000469465.1_ASM46946v1	GCF_000469465.1	209886	555	1603008
Positive	Bacteria	Firmicutes	Clostridia	Clostridiales	Lachnospiraceae [XIV]	Catonella	morbi	ATCC 51271	Catonella_morbi_ATCC_51271.mat	SEQF1596	592026	ftp://ftp.ncbi.nlm.nih.gov/genomes/all/GCF/000/160/035/GCF_000160035.2_ASM16003v2	GCF_000160035.2	2569	165	2043439
Positive	Bacteria	Firmicutes	Bacilli	Bacillales	Gemellaceae	Gemella	haemolysans	ATCC 10379	Gemella_haemolysans_ATCC_10379.mat	SEQF1019	546270	ftp://ftp.ncbi.nlm.nih.gov/genomes/all/GCF/000/173/915/GCF_000173915.1_ASM17391v1	GCF_000173915.1	2189	626	1916192
Positive	Bacteria	Firmicutes	Bacilli	Bacillales	Gemellaceae	Gemella	haemolysans	M341	Gemella_haemolysans_M341.mat	SEQF2070	562981	ftp://ftp.ncbi.nlm.nih.gov/genomes/all/GCF/000/204/355/GCF_000204355.1_Geme_haem_M341_V1	GCF_000204355.1	2333	626	2034879
Positive	Bacteria	Firmicutes	Bacilli	Bacillales	Gemellaceae	Gemella	morbillorum	M424	Gemella_morbillorum_M424.mat	SEQF2298	562982	ftp://ftp.ncbi.nlm.nih.gov/genomes/all/GCF/000/185/645/GCF_000185645.1_ASM18564v1	GCF_000185645.1	2334	46	1752918
Positive	Bacteria	Firmicutes	Bacilli	Bacillales	Gemellaceae	Gemella	sanguinis	M325	Gemella_sanguinis_M325.mat	SEQF2071	562983	ftp://ftp.ncbi.nlm.nih.gov/genomes/all/GCF/000/204/335/GCF_000204335.2_Geme_sang_M325_V2	GCF_000204335.2	2335	757	1768070
Negative	Bacteria	Bacteroidetes	Bacteroidia	Bacteroidales	Bacteroidaceae	Bacteroides	pyogenes	DSM 20611	Bacteroides_pyogenes_DSM_20611.mat	SEQF2665	1121100	ftp://ftp.ncbi.nlm.nih.gov/genomes/all/GCF/000/428/105/GCF_000428105.1_ASM42810v1	GCF_000428105.1	207059	787	3422915
Negative	Bacteria	Bacteroidetes	Bacteroidia	Bacteroidales	Porphyromonadaceae	Tannerella	sp. oral taxon 286	isolate Cell 2	Tannerella_sp._oral_taxon_286_Cell_2.mat	SEQF2635	1411148	ftp://ftp.ncbi.nlm.nih.gov/genomes/refseq/bacteria/Tannerella_sp._oral_taxon_HOT-286/all_assembly_versions/suppressed/GCF_000510385.1_BU063sc2	GCF_000510385.1	213495	286	3038315
Negative	Bacteria	Bacteroidetes	Bacteroidia	Bacteroidales	Porphyromonadaceae	Tannerella	sp. oral taxon 286	isolate Cell 6/7/9	Tannerella_sp._oral_taxon_286_Cell_6_7_9.mat	SEQF2637	1411021	ftp://ftp.ncbi.nlm.nih.gov/genomes/refseq/bacteria/Tannerella_sp._oral_taxon_HOT-286/all_assembly_versions/suppressed/GCF_000510525.1_BU063sc679	GCF_000510525.1	213493	286	3476954
Negative	Bacteria	Bacteroidetes	Bacteroidia	Bacteroidales	Porphyromonadaceae	Tannerella	sp. oral taxon 286	W11667	Tannerella_oral_taxon_286_W11667.mat	SEQF2807	712710	ftp://ftp.ncbi.nlm.nih.gov/genomes/refseq/bacteria/Tannerella_sp._oral_taxon_HOT-286/all_assembly_versions/GCF_001717525.1_ASM171752v1	GCF_001717525.1	external	286	2973531	manually uploaded genome, annotated with RAST
Negative	Bacteria	Bacteroidetes	Bacteroidia	Bacteroidales	Porphyromonadaceae	Tannerella	sp. oral taxon 286	isolate Cell 5	Tannerella_oral_taxon_BU063_isolate_Cell_5.mat	SEQF2636	1410950	ftp://ftp.ncbi.nlm.nih.gov/genomes/refseq/bacteria/Tannerella_sp._oral_taxon_HOT-286/all_assembly_versions/suppressed/GCF_000510505.1_BU063sc5	GCF_000510505.1	213492	286	3214909
Negative	Bacteria	Fusobacteria	Fusobacteriia	Fusobacteriales	Fusobacteriaceae	Fusobacterium	periodonticum	1_1_41FAA	Fusobacterium_periodonticum_1_1_41FAA.mat	SEQF2555	469621	ftp://ftp.ncbi.nlm.nih.gov/genomes/all/GCF/000/163/935/GCF_000163935.1_ASM16393v1	GCF_000163935.1	1676	201	2479455
Negative	Bacteria	Fusobacteria	Fusobacteriia	Fusobacteriales	Fusobacteriaceae	Fusobacterium	nucleatum subsp. polymorphum	ATCC 10953	Fusobacterium_nucleatum_polymorphum_ATCC_10953.mat	SEQF1075	393480	ftp://ftp.ncbi.nlm.nih.gov/genomes/all/GCF/000/153/625/GCF_000153625.3_ASM15362v1	GCF_000153625.3	1245	202	2441632
Negative	Bacteria	Fusobacteria	Fusobacteriia	Fusobacteriales	Fusobacteriaceae	Fusobacterium	periodonticum	ATCC 33693	Fusobacterium_periodonticum_ATCC_33693.mat	SEQF1160	546275	ftp://ftp.ncbi.nlm.nih.gov/genomes/all/GCF/000/160/475/GCF_000160475.1_ASM16047v1	GCF_000160475.1	2195	201	2615003
Negative	Bacteria	Fusobacteria	Fusobacteriia	Fusobacteriales	Fusobacteriaceae	Fusobacterium	nucleatum subsp. animalis	F0419	Fusobacterium_nucleatum_animalis_F0419.mat	SEQF1883	999414	ftp://ftp.ncbi.nlm.nih.gov/genomes/all/GCF/000/242/975/GCF_000242975.1_Fuso_nucl_OT_420_V1	GCF_000242975.1	28928	420	2408755	Name change, strain: "OT 420"
Negative	Bacteria	Fusobacteria	Fusobacteriia	Fusobacteriales	Fusobacteriaceae	Fusobacterium	necrophorum	subsp. funduliforme 1_1_36S	Fusobacterium_necrophorum_funduliforme_1_1_36S.mat	SEQF2064	742814	ftp://ftp.ncbi.nlm.nih.gov/genomes/refseq/bacteria/Fusobacterium_necrophorum/all_assembly_versions/suppressed/GCF_000242215.1_Fuso_necr_1_1_36S_V1	GCF_000242215.1	27485	690	2300242
Negative	Bacteria	Fusobacteria	Fusobacteriia	Fusobacteriales	Fusobacteriaceae	Fusobacterium	nucleatum subsp. animalis	4_8	Fusobacterium_nucleatum_animalis_4_8.mat	SEQF2539	469607	ftp://ftp.ncbi.nlm.nih.gov/genomes/all/GCF/000/400/875/GCF_000400875.1_ASM40087v1	GCF_000400875.1	32211	420	2275461
Negative	Bacteria	Fusobacteria	Fusobacteriia	Fusobacteriales	Fusobacteriaceae	Fusobacterium	nucleatum subsp. vincentii	ATCC 49256	Fusobacterium_nucleatum_vincentii_ATCC_49256.mat	SEQF1076	209882	ftp://ftp.ncbi.nlm.nih.gov/genomes/all/GCF/000/182/945/GCF_000182945.1_ASM18294v1	GCF_000182945.1	26107	200	2118259
Negative	Bacteria	Fusobacteria	Fusobacteriia	Fusobacteriales	Fusobacteriaceae	Fusobacterium	sp. oral taxon 370	F0437	Fusobacterium_oral_taxon_370_F0437.mat	SEQF1879	861452	ftp://ftp.ncbi.nlm.nih.gov/genomes/all/GCF/000/235/465/GCF_000235465.1_ASM23546v1	GCF_000235465.1	27834	370	2081834
Negative	Bacteria	Fusobacteria	Fusobacteriia	Fusobacteriales	Fusobacteriaceae	Fusobacterium	nucleatum subsp. nucleatum	ATCC 25586	Fusobacterium_nucleatum_nucleatum_ATCC_25586.mat	SEQF1078	190304	ftp://ftp.ncbi.nlm.nih.gov/genomes/all/GCF/000/007/325/GCF_000007325.1_ASM732v1	GCF_000007325.1	191	698	2174500
Negative	Bacteria	Fusobacteria	Fusobacteriia	Fusobacteriales	Fusobacteriaceae	Fusobacterium	gonidiaformans	3-1-5R	Fusobacterium_gonidiaformans_3-1-5R.mat	SEQF2550	469605	ftp://ftp.ncbi.nlm.nih.gov/genomes/all/GCF/000/158/235/GCF_000158235.1_ASM15823v1	GCF_000158235.1	1666	860	1930430
Negative	Bacteria	Fusobacteria	Fusobacteriia	Fusobacteriales	Fusobacteriaceae	Fusobacterium	gonidiaformans	ATCC 25563	Fusobacterium_gonidiaformans_ATCC_25563.mat	SEQF1983	469615	ftp://ftp.ncbi.nlm.nih.gov/genomes/all/GCF/000/158/835/GCF_000158835.2_Fuso_gon_ATCC25563_V2	GCF_000158835.2	1672	860	1712099
Negative	Bacteria	Bacteroidetes	Bacteroidia	Bacteroidales	Porphyromonadaceae	Porphyromonas	asaccharolytica	PR426713P-I	Porphyromonas_asaccharolytica_PR426713P-I.mat	SEQF2145	910312	ftp://ftp.ncbi.nlm.nih.gov/genomes/all/GCF/000/183/605/GCF_000183605.1_ASM18360v1	GCF_000183605.1	3690	547	2199119
Negative	Bacteria	Bacteroidetes	Bacteroidia	Bacteroidales	Porphyromonadaceae	Porphyromonas	uenonis	JCM 13868	Porphyromonas_uenonis_JCM_13868.mat	SEQF2674	1236493	ftp://ftp.ncbi.nlm.nih.gov/genomes/refseq/bacteria/Porphyromonas_uenonis/all_assembly_versions/GCF_000613705.1_ASM61370v1	GCF_000613705.1	242245	785	2260105
Negative	Bacteria	Bacteroidetes	Bacteroidia	Bacteroidales	Porphyromonadaceae	Porphyromonas	catoniae	F0037	Porphyromonas_catoniae_F0037.mat	SEQF1936	1127696	ftp://ftp.ncbi.nlm.nih.gov/genomes/all/GCF/000/318/215/GCF_000318215.2_ASM31821v2	GCF_000318215.2	29765	283	2106321
Negative	Bacteria	Bacteroidetes	Bacteroidia	Bacteroidales	Porphyromonadaceae	Porphyromonas	gingivalis	ATCC 33277	Porphyromonas_gingivalis_ATCC_33277.mat	SEQF1538	431947	ftp://ftp.ncbi.nlm.nih.gov/genomes/all/GCF/000/010/505/GCF_000010505.1_ASM1050v1	GCF_000010505.1	1446	619	2354886
Negative	Bacteria	Bacteroidetes	Bacteroidia	Bacteroidales	Porphyromonadaceae	Porphyromonas	uenonis	60-3	Porphyromonas_uenonis_60-3.mat	SEQF1796	596327	ftp://ftp.ncbi.nlm.nih.gov/genomes/all/GCF/000/174/775/GCF_000174775.1_ASM17477v1	GCF_000174775.1	2611	785	2242885
Negative	Bacteria	Bacteroidetes	Bacteroidia	Bacteroidales	Porphyromonadaceae	Porphyromonas	sp. oral taxon 278	W7784	Porphyromonas_OT_278_W7784.mat	SEQF2357	1227272	ftp://ftp.ncbi.nlm.nih.gov/genomes/all/GCF/000/467/855/GCF_000467855.2_ASM46785v2	GCF_000467855.2	208207	278	2155434
Negative	Bacteria	Bacteroidetes	Bacteroidia	Bacteroidales	Porphyromonadaceae	Porphyromonas	asaccharolytica	DSM 20707	Porphyromonas_asaccharolytica_DSM_20707.mat	SEQF2160	879243	ftp://ftp.ncbi.nlm.nih.gov/genomes/all/GCF/000/212/375/GCF_000212375.1_ASM21237v1	GCF_000212375.1	3543	547	2186370
Positive	Bacteria	Firmicutes	Clostridia	Clostridiales	Lachnospiraceae [XIV]	Lachnoanaerobaculum	umeaense	F0167	Lachnospiraceae_bacterium_Oral_taxon_107_F0167.mat	SEQF1478	575593	ftp://ftp.ncbi.nlm.nih.gov/genomes/all/GCF/000/209/465/GCF_000209465.1_Lach_bact_F0167_V1	GCF_000209465.1	2454	107	3279855
Positive	Bacteria	Firmicutes	Clostridia	Clostridiales	Lachnospiraceae [XIV]	Oribacterium	asaccharolyticum	F0425	Oribacterium_oral_taxon_108_F0425.mat	SEQF1854	904296	ftp://ftp.ncbi.nlm.nih.gov/genomes/all/GCF/000/214/455/GCF_000214455.1_ASM21445v1	GCF_000214455.1	3654	108	2518361
Positive	Bacteria	Firmicutes	Bacilli	Lactobacillales	Aerococcaceae	Abiotrophia	defectiva	ATCC 49176	Abiotrophia_defectiva_ATCC_49176.mat	SEQF1595	592010	ftp://ftp.ncbi.nlm.nih.gov/genomes/all/GCF/000/160/075/GCF_000160075.2_ASM16007v2	GCF_000160075.2	2564	389	3479204
Negative	Bacteria	Bacteroidetes	Bacteroidia	Bacteroidales	Porphyromonadaceae	Tannerella	forsythia	ATCC 43037, FDC 338	Tannerella_forsythia_ATCC_43037.mat	SEQF2738	28112	ftp://ftp.ncbi.nlm.nih.gov/genomes/refseq/bacteria/Tannerella_forsythia/all_assembly_versions/GCF_001006485.1_ASM100648v1	GCF_001006485.1	26084	613	3405521
Negative	Bacteria	Bacteroidetes	Bacteroidia	Bacteroidales	Prevotellaceae	Prevotella	maculosa	DSM 19339	Prevotella_maculosa_DSM_19339.mat	SEQF2508	1122986	ftp://ftp.ncbi.nlm.nih.gov/genomes/all/GCF/000/382/385/GCF_000382385.1_ASM38238v1	GCF_000382385.1	29665	289	3312100
Negative	Bacteria	Bacteroidetes	Bacteroidia	Bacteroidales	Prevotellaceae	Prevotella	maculosa	JCM 15638	Prevotella_maculosa_JCM_15638.mat	SEQF2680	1236506	ftp://ftp.ncbi.nlm.nih.gov/genomes/refseq/bacteria/Prevotella_maculosa/all_assembly_versions/GCF_000613965.1_ASM61396v1	GCF_000613965.1	242263	289	3296416
Negative	Bacteria	Bacteroidetes	Bacteroidia	Bacteroidales	Prevotellaceae	Prevotella	maculosa	OT 289, F0099	Prevotella_maculosa_OT_289.mat	SEQF2147	999422	ftp://ftp.ncbi.nlm.nih.gov/genomes/all/GCF/000/243/015/GCF_000243015.1_Prev_macu_OT_289_V1	GCF_000243015.1	28935	289	3134147
Negative	Bacteria	Bacteroidetes	Bacteroidia	Bacteroidales	Prevotellaceae	Prevotella	salivae	DSM 15606	Prevotella_salivae_DSM_15606.mat	SEQF2149	888832	ftp://ftp.ncbi.nlm.nih.gov/genomes/all/GCF/000/185/845/GCF_000185845.1_ASM18584v1	GCF_000185845.1	3628	307	3274581
Negative	Bacteria	Bacteroidetes	Bacteroidia	Bacteroidales	Prevotellaceae	Prevotella	oulorum	F0390	Prevotella_oulorum_F0390.mat	SEQF1691	702438	ftp://ftp.ncbi.nlm.nih.gov/genomes/all/GCF/000/224/615/GCF_000224615.1_Prev_oulo_F0390_V1	GCF_000224615.1	27419	288	2788455
Negative	Bacteria	Bacteroidetes	Bacteroidia	Bacteroidales	Prevotellaceae	Prevotella	oulorum	JCM 14966	Prevotella_oulorum_JCM_14966.mat	SEQF2684	1236497	ftp://ftp.ncbi.nlm.nih.gov/genomes/all/GCF/000/613/785/GCF_000613785.1_ASM61378v1	GCF_000613785.1	242268	288	2827758
Negative	Bacteria	Proteobacteria	Alphaproteobacteria	Rhizobiales	Bartonellaceae	Bartonella	schoenbuchensis	m07a	Bartonella_schoenbuchensis_m07a.mat	SEQF2664	1094496	ftp://ftp.ncbi.nlm.nih.gov/genomes/all/GCF/000/385/435/GCF_000385435.1_m07aNrPeIrM01	GCF_000385435.1	29277	1	1741199
Negative	Bacteria	Bacteroidetes	Bacteroidia	Bacteroidales	Prevotellaceae	Prevotella	micans	JCM 16134	Prevotella_micans_JCM_16134.mat	SEQF2682	1236510	ftp://ftp.ncbi.nlm.nih.gov/genomes/refseq/bacteria/Prevotella_micans/all_assembly_versions/GCF_000614105.1_ASM61410v1	GCF_000614105.1	242265	378	2426740
Negative	Bacteria	Bacteroidetes	Bacteroidia	Bacteroidales	Prevotellaceae	Prevotella	micans	DSM 21469	Prevotella_micans_DSM_21469.mat	SEQF2509	1122987	ftp://ftp.ncbi.nlm.nih.gov/genomes/all/GCF/000/373/705/GCF_000373705.1_ASM37370v1	GCF_000373705.1	29666	378	2434532
Negative	Bacteria	Bacteroidetes	Bacteroidia	Bacteroidales	Prevotellaceae	Prevotella	micans	F0438	Prevotella_micans_F0438.mat	SEQF1863	883158	ftp://ftp.ncbi.nlm.nih.gov/genomes/all/GCF/000/243/035/GCF_000243035.1_Prev_mica_F0438_V1	GCF_000243035.1	28046	378	2467372
Negative	Bacteria	Bacteroidetes	Bacteroidia	Bacteroidales	Prevotellaceae	Prevotella	buccalis	ATCC 35310	Prevotella_buccalis_ATCC_35310.mat	SEQF1799	679190	ftp://ftp.ncbi.nlm.nih.gov/genomes/all/GCF/000/177/075/GCF_000177075.1_ASM17707v1	GCF_000177075.1	2934	562	3033961
Negative	Bacteria	Bacteroidetes	Bacteroidia	Bacteroidales	Prevotellaceae	Prevotella	oris	F0302	Prevotella_oris_F0302.mat	SEQF1656	649760	ftp://ftp.ncbi.nlm.nih.gov/genomes/all/GCF/000/162/915/GCF_000162915.1_ASM16291v1	GCF_000162915.1	2776	311	3251636
Negative	Bacteria	Bacteroidetes	Bacteroidia	Bacteroidales	Prevotellaceae	Prevotella	bivia	DSM 20514	Prevotella_bivia_DSM_20514.mat	SEQF2380	868129	ftp://ftp.ncbi.nlm.nih.gov/genomes/all/GCF/000/262/545/GCF_000262545.1_ASM26254v1	GCF_000262545.1	27853	556	2520138
Negative	Bacteria	Bacteroidetes	Bacteroidia	Bacteroidales	Prevotellaceae	Prevotella	bivia	JCVIHMP010	Prevotella_bivia_JCVIHMP010.mat	SEQF1797	553171	ftp://ftp.ncbi.nlm.nih.gov/genomes/all/GCF/000/177/315/GCF_000177315.1_ASM17731v1	GCF_000177315.1	2239	556	2424432
Negative	Bacteria	Proteobacteria	Epsilonproteobacteria	Campylobacterales	Helicobacteraceae	Helicobacter	pylori	B38	Helicobacter_pylori_B38.mat	SEQF1714	592205	ftp://ftp.ncbi.nlm.nih.gov/genomes/all/GCF/000/091/345/GCF_000091345.1_ASM9134v1	GCF_000091345.1	2573	812	1576758
Negative	Bacteria	Proteobacteria	Epsilonproteobacteria	Campylobacterales	Helicobacteraceae	Helicobacter	pylori	India7	Helicobacter_pylori_India7.mat	SEQF2409	907238	ftp://ftp.ncbi.nlm.nih.gov/genomes/all/GCF/000/185/185/GCF_000185185.1_ASM18518v1	GCF_000185185.1	3668	812	1675918
Negative	Bacteria	Synergistetes	Synergistia	Synergistales	Dethiosulfovibrionaceae	Jonquetella	anthropi	DSM 22815	Jonquetella_anthropi_DSM_22815.mat	SEQF2078	885272	ftp://ftp.ncbi.nlm.nih.gov/genomes/all/GCF/000/237/805/GCF_000237805.1_ASM23780v1	GCF_000237805.1	28054	777	1675634
Negative	Bacteria	Synergistetes	Synergistia	Synergistales	Dethiosulfovibrionaceae	Jonquetella	anthropi	E3_33 E1	Jonquetella_anthropi_E3_33_E1.mat	SEQF1476	645512	ftp://ftp.ncbi.nlm.nih.gov/genomes/refseq/bacteria/Jonquetella_anthropi/all_assembly_versions/GCF_000161995.1_ASM16199v1	GCF_000161995.1	2757	777	1790058
Negative	Bacteria	Proteobacteria	Gammaproteobacteria	Pasteurellales	Pasteurellaceae	Haemophilus	ducreyi	35000HP	Haemophilus_ducreyi_35000HP.mat	SEQF1027	233412	ftp://ftp.ncbi.nlm.nih.gov/genomes/all/GCF/000/007/945/GCF_000007945.1_ASM794v1	GCF_000007945.1	458	821	1698955
Positive	Bacteria	Firmicutes	Clostridia	Clostridiales	Peptostreptococcaceae [XI]	Filifactor	alocis	ATCC 35896	Filifactor_alocis_ATCC_35896.mat	SEQF1018	546269	ftp://ftp.ncbi.nlm.nih.gov/genomes/all/GCF/000/163/895/GCF_000163895.2_ASM16389v2	GCF_000163895.2	26890	539	1931012
Negative	Bacteria	Firmicutes	Negativicutes	Selenomonadales	Veillonellaceae	Dialister	micraerophilus	DSM 19965	Dialister_micraerophilus_DSM_19965.mat	SEQF1959	888062	ftp://ftp.ncbi.nlm.nih.gov/genomes/all/GCF/000/194/985/GCF_000194985.1_ASM19498v1	GCF_000194985.1	3597	843	1256198
Negative	Bacteria	Bacteroidetes	Flavobacteriia	Flavobacteriales	Flavobacteriaceae	Capnocytophaga	sp. oral taxon 863	F0517	Capnocytophaga_oral_taxon_863_F0517.mat	SEQF2319	1227266	ftp://ftp.ncbi.nlm.nih.gov/genomes/all/GCF/000/466/425/GCF_000466425.1_ASM46642v1	GCF_000466425.1	208202	863	2715506
Negative	Bacteria	Bacteroidetes	Flavobacteriia	Flavobacteriales	Flavobacteriaceae	Capnocytophaga	sputigena	ATCC 33612	Capnocytophaga_sputigena_ATCC_33612.mat	SEQF1576	553177	ftp://ftp.ncbi.nlm.nih.gov/genomes/all/GCF/000/173/675/GCF_000173675.1_ASM17367v1	GCF_000173675.1	2243	775	2997845
Negative	Bacteria	Bacteroidetes	Flavobacteriia	Flavobacteriales	Flavobacteriaceae	Capnocytophaga	gingivalis	ATCC 33624	Capnocytophaga_gingivalis_ATCC_33624.mat	SEQF1602	553178	ftp://ftp.ncbi.nlm.nih.gov/genomes/all/GCF/000/174/755/GCF_000174755.1_ASM17475v1	GCF_000174755.1	2244	337	2667138
Negative	Bacteria	Bacteroidetes	Flavobacteriia	Flavobacteriales	Flavobacteriaceae	Capnocytophaga	sp. oral taxon 332	F0381	Capnocytophaga_oral_taxon_332_F0381.mat	SEQF1937	1127692	ftp://ftp.ncbi.nlm.nih.gov/genomes/all/GCF/000/318/275/GCF_000318275.2_ASM31827v2	GCF_000318275.2	29761	332	2658355
Negative	Bacteria	Bacteroidetes	Flavobacteriia	Flavobacteriales	Flavobacteriaceae	Capnocytophaga	granulosa	ATCC 51502	Capnocytophaga_granulosa_ATCC_51502.mat	SEQF1653	641143	ftp://ftp.ncbi.nlm.nih.gov/genomes/all/GCF/000/411/115/GCF_000411115.1_Capn_gran_ATCC_51502_V1	GCF_000411115.1	32240	325	2740113
Negative	Bacteria	Bacteroidetes	Bacteroidia	Bacteroidales	Porphyromonadaceae	Porphyromonas	pasteri	F0450	Porphyromonas_oral_taxon_279_F0450.mat	SEQF1907	1125723	ftp://ftp.ncbi.nlm.nih.gov/genomes/all/GCF/000/292/995/GCF_000292995.1_Psp279F0450v1.0	GCF_000292995.1	24421	279	2265201
Negative	Bacteria	Bacteroidetes	Bacteroidia	Bacteroidales	Porphyromonadaceae	Porphyromonas	gingivalis	W83	Porphyromonas_gingivalis_W83.mat	SEQF1064	242619	ftp://ftp.ncbi.nlm.nih.gov/genomes/all/GCF/000/007/585/GCF_000007585.1_ASM758v1	GCF_000007585.1	476	619	2343476
Negative	Bacteria	Bacteroidetes	Bacteroidia	Bacteroidales	Prevotellaceae	Prevotella	multisaccharivorax	DSM 17128	Prevotella_multisaccharivorax_DSM_17128.mat	SEQF1987	688246	ftp://ftp.ncbi.nlm.nih.gov/genomes/all/GCF/000/218/235/GCF_000218235.1_ASM21823v1	GCF_000218235.1	2974	794	3387544
Negative	Bacteria	Bacteroidetes	Bacteroidia	Bacteroidales	Prevotellaceae	Prevotella	baroniae	DSM 16972	Prevotella_baroniae_DSM_16972.mat	SEQF2582	1122980	ftp://ftp.ncbi.nlm.nih.gov/genomes/all/GCF/000/426/585/GCF_000426585.1_ASM42658v1	GCF_000426585.1	207236	553	3128637
Negative	Bacteria	Bacteroidetes	Bacteroidia	Bacteroidales	Prevotellaceae	Prevotella	baroniae	JCM 13447	Prevotella_baroniae_JCM_13447.mat	SEQF2675	1235823	ftp://ftp.ncbi.nlm.nih.gov/genomes/refseq/bacteria/Prevotella_baroniae/all_assembly_versions/GCF_000613565.1_ASM61356v1	GCF_000613565.1	242252	553	3116148
Negative	Bacteria	Bacteroidetes	Flavobacteriia	Flavobacteriales	Flavobacteriaceae	Capnocytophaga	leadbetteri	F0087	Capnocytophaga_oral_taxon_329_F0087.mat	SEQF1684	706436	ftp://ftp.ncbi.nlm.nih.gov/genomes/all/GCF/000/213/295/GCF_000213295.2_ASM21329v2	GCF_000213295.2	3057	329	6748636
Negative	Bacteria	Bacteroidetes	Bacteroidia	Bacteroidales	Prevotellaceae	Prevotella	dentalis	DSM 3688	Prevotella_dentalis_DSM_3688.mat	SEQF2022	908937	ftp://ftp.ncbi.nlm.nih.gov/genomes/all/GCF/000/220/215/GCF_000220215.1_ASM22021v1	GCF_000220215.1	28322	583	3240350
Negative	Bacteria	Bacteroidetes	Bacteroidia	Bacteroidales	Prevotellaceae	Prevotella	buccae	D17	Prevotella_buccae_D17.mat	SEQF1798	575611	ftp://ftp.ncbi.nlm.nih.gov/genomes/all/GCF/000/162/455/GCF_000162455.1_ASM16245v1	GCF_000162455.1	2466	560	3357950
Negative	Bacteria	Bacteroidetes	Bacteroidia	Bacteroidales	Prevotellaceae	Alloprevotella	rava	F0323	Prevotella_oral_taxon_302_F0323.mat	SEQF1671	679199	ftp://ftp.ncbi.nlm.nih.gov/genomes/all/GCF/000/234/115/GCF_000234115.1_Prevotella_sp_F0323_V1	GCF_000234115.1	27340	302	2588570
Negative	Bacteria	Bacteroidetes	Bacteroidia	Bacteroidales	Bacteroidales [F-2]	Bacteroidales [G-2]	sp. oral taxon 274	F0058	Bacteroidetes_bacterium_oral_taxon_274_F0058.mat	SEQF1451	575590	ftp://ftp.ncbi.nlm.nih.gov/genomes/all/GCF/000/163/695/GCF_000163695.1_ASM16369v1	GCF_000163695.1	2452	274	2113539
Negative	Bacteria	Bacteroidetes	Bacteroidia	Bacteroidales	Prevotellaceae	Alloprevotella	tannerae	ATCC 51259	Prevotella_tannerae_ATCC_51259.mat	SEQF1597	626522	ftp://ftp.ncbi.nlm.nih.gov/genomes/all/GCF/000/159/995/GCF_000159995.1_ASM15999v1	GCF_000159995.1	2651	466	5160023
Negative	Bacteria	Bacteroidetes	Flavobacteriia	Flavobacteriales	Flavobacteriaceae	Capnocytophaga	sp. oral taxon 336	F0502	Capnocytophaga_oral_taxon_336_F0502.mat	SEQF1970	1203603	ftp://ftp.ncbi.nlm.nih.gov/genomes/all/GCF/000/411/575/GCF_000411575.1_Capn_sp_oral_taxon_336_F0502_V1	GCF_000411575.1	31099	336	2783006
Negative	Bacteria	Bacteroidetes	Flavobacteriia	Flavobacteriales	Flavobacteriaceae	Capnocytophaga	sp. oral taxon 338	F0234	Capnocytophaga_oral_taxon_338_F0234.mat	SEQF1687	888059	ftp://ftp.ncbi.nlm.nih.gov/genomes/all/GCF/000/192/225/GCF_000192225.1_ASM19222v1	GCF_000192225.1	3595	338	2548422
Negative	Bacteria	Bacteroidetes	Flavobacteriia	Flavobacteriales	Flavobacteriaceae	Capnocytophaga	sp. oral taxon 326	F0382	Capnocytophaga_oral_taxon_326_F0382.mat	SEQF1900	1035193	ftp://ftp.ncbi.nlm.nih.gov/genomes/all/GCF/000/318/295/GCF_000318295.1_ASM31829v1	GCF_000318295.1	29104	326	3215823
Negative	Bacteria	Bacteroidetes	Flavobacteriia	Flavobacteriales	Flavobacteriaceae	Capnocytophaga	ochracea	DSM 7271, ATCC 27872, JCM 12966	Capnocytophaga_ochracea_DSM_7271.mat	SEQF1008	521097	ftp://ftp.ncbi.nlm.nih.gov/genomes/all/GCF/000/023/285/GCF_000023285.1_ASM2328v1	GCF_000023285.1	1959	700	2612925
Negative	Bacteria	Bacteroidetes	Flavobacteriia	Flavobacteriales	Flavobacteriaceae	Capnocytophaga	sp. oral taxon 412	F0487	Capnocytophaga_oral_taxon_412_F0487.mat	SEQF1909	1125721	ftp://ftp.ncbi.nlm.nih.gov/genomes/all/GCF/000/271/925/GCF_000271925.1_Coraltaxon412F0487v1.0	GCF_000271925.1	24419	412	2590781
Negative	Bacteria	Bacteroidetes	Flavobacteriia	Flavobacteriales	Flavobacteriaceae	Capnocytophaga	sp. oral taxon 335	F0486	Capnocytophaga_oral_taxon_335_F0486.mat	SEQF1906	1125720	ftp://ftp.ncbi.nlm.nih.gov/genomes/all/GCF/000/277/665/GCF_000277665.1_Coraltaxon335F0486v1.0	GCF_000277665.1	24418	335	2545989
Negative	Bacteria	Bacteroidetes	Flavobacteriia	Flavobacteriales	Flavobacteriaceae	Capnocytophaga	sp. oral taxon 324	F0483	Capnocytophaga_oral_taxon_324_F0483.mat	SEQF1938	1127691	ftp://ftp.ncbi.nlm.nih.gov/genomes/all/GCF/000/318/315/GCF_000318315.2_ASM31831v2	GCF_000318315.2	29760	324	2742322
Negative	Bacteria	Bacteroidetes	Flavobacteriia	Flavobacteriales	Flavobacteriaceae	Capnocytophaga	sp. oral taxon 380	F0488	Capnocytophaga_oral_taxon_380_F0488.mat	SEQF1950	1127693	ftp://ftp.ncbi.nlm.nih.gov/genomes/all/GCF/000/318/255/GCF_000318255.2_ASM31825v2	GCF_000318255.2	29762	380	2637185
Negative	Bacteria	Bacteroidetes	Bacteroidia	Bacteroidales	Prevotellaceae	Prevotella	marshii	DSM 16973	Prevotella_marshii_DSM_16973.mat	SEQF1915	862515	ftp://ftp.ncbi.nlm.nih.gov/genomes/all/GCF/000/146/675/GCF_000146675.1_ASM14667v1	GCF_000146675.1	3435	665	2517013
Negative	Bacteria	Bacteroidetes	Bacteroidia	Bacteroidales	Prevotellaceae	Prevotella	marshii	JCM 13450	Prevotella_marshii_JCM_13450.mat	SEQF2681	1236489	ftp://ftp.ncbi.nlm.nih.gov/genomes/refseq/bacteria/Prevotella_marshii/all_assembly_versions/GCF_000613625.1_ASM61362v1	GCF_000613625.1	242264	665	2518161
Negative	Bacteria	Bacteroidetes	Bacteroidia	Bacteroidales	Prevotellaceae	Prevotella	histicola	F0411	Prevotella_histicola_F0411.mat	SEQF1852	857291	ftp://ftp.ncbi.nlm.nih.gov/genomes/all/GCF/000/234/055/GCF_000234055.1_Prev_hist_F0411_V1	GCF_000234055.1	27811	298	2987441
Negative	Bacteria	Bacteroidetes	Bacteroidia	Bacteroidales	Prevotellaceae	Prevotella	histicola	JCM 15637 = DNF00424	Prevotella_histicola_JCM_15637_DNF00424.mat	SEQF2679	1236504	ftp://ftp.ncbi.nlm.nih.gov/genomes/all/GCF/000/613/925/GCF_000613925.1_ASM61392v1	GCF_000613925.1	242262	298	2949807
Negative	Bacteria	Bacteroidetes	Bacteroidia	Bacteroidales	Prevotellaceae	Prevotella	scopos	JCM 17725	Prevotella_scopus_JCM_17725.mat	SEQF2686	1236518	ftp://ftp.ncbi.nlm.nih.gov/genomes/all/GCF/000/614/285/GCF_000614285.1_ASM61428v1	GCF_000614285.1	242274	885	3184425	Name change, Species: "scopos"
Negative	Bacteria	Bacteroidetes	Bacteroidia	Bacteroidales	Prevotellaceae	Prevotella	melaninogenica	ATCC 25845	Prevotella_melaninogenica_ATCC_25845.mat	SEQF1142	553174	ftp://ftp.ncbi.nlm.nih.gov/genomes/all/GCF/000/144/405/GCF_000144405.1_ASM14440v1	GCF_000144405.1	2241	469	3168282
Negative	Bacteria	Bacteroidetes	Bacteroidia	Bacteroidales	Prevotellaceae	Prevotella	melaninogenica	D18	Prevotella_melaninogenica_D18.mat	SEQF1800	575612	ftp://ftp.ncbi.nlm.nih.gov/genomes/all/GCF/000/163/035/GCF_000163035.1_ASM16303v1	GCF_000163035.1	2467	469	3292341
Negative	Bacteria	Bacteroidetes	Bacteroidia	Bacteroidales	Prevotellaceae	Prevotella	fusca	JCM 17724	Prevotella_fusca_JCM_17724.mat	SEQF2678	1236517	ftp://ftp.ncbi.nlm.nih.gov/genomes/all/GCF/000/614/245/GCF_000614245.1_ASM61424v1	GCF_000614245.1	242261	782	3173817
Negative	Bacteria	Bacteroidetes	Bacteroidia	Bacteroidales	Prevotellaceae	Prevotella	loescheii	DSM 19665 = JCM 12249 = ATCC 15930	Prevotella_loescheii_DSM_19665_JCM_12249_ATCC_15930.mat	SEQF2461	1122985	ftp://ftp.ncbi.nlm.nih.gov/genomes/all/GCF/000/378/085/GCF_000378085.1_ASM37808v1	GCF_000378085.1	29664	658	3504766
Negative	Bacteria	Bacteroidetes	Bacteroidia	Bacteroidales	Prevotellaceae	Prevotella	sp. oral taxon 317	F0108	Prevotella_oral_taxon_317_F0108.mat	SEQF1477	575615	ftp://ftp.ncbi.nlm.nih.gov/genomes/all/GCF/000/162/415/GCF_000162415.1_ASM16241v1	GCF_000162415.1	2469	317	4099098
Negative	Bacteria	Bacteroidetes	Bacteroidia	Bacteroidales	Prevotellaceae	Prevotella	sp. oral taxon 472	F0295	Prevotella_oral_taxon_472_F0295.mat	SEQF1617	619693	ftp://ftp.ncbi.nlm.nih.gov/genomes/all/GCF/000/163/495/GCF_000163495.1_ASM16349v1	GCF_000163495.1	2638	472	3635499
Negative	Bacteria	Bacteroidetes	Bacteroidia	Bacteroidales	Prevotellaceae	Prevotella	shahii	JCM 12083	Prevotella_shahii_JCM_12083.mat	SEQF2687	1235817	ftp://ftp.ncbi.nlm.nih.gov/genomes/refseq/bacteria/Prevotella_shahii/all_assembly_versions/GCF_000613445.1_ASM61344v1	GCF_000613445.1	242275	795	3489881
Negative	Bacteria	Bacteroidetes	Bacteroidia	Bacteroidales	Prevotellaceae	Prevotella	nanceiensis	F0039	Prevotella_oral_taxon_299_F0039.mat	SEQF1452	575614	ftp://ftp.ncbi.nlm.nih.gov/genomes/all/GCF/000/163/055/GCF_000163055.2_ASM16305v2	GCF_000163055.2	2468	299	2453028
Negative	Bacteria	Bacteroidetes	Bacteroidia	Bacteroidales	Prevotellaceae	Prevotella	sp. oral taxon 306	F0472	Prevotella_oral_taxon_306_F0472.mat	SEQF1887	1095752	ftp://ftp.ncbi.nlm.nih.gov/genomes/all/GCF/000/257/925/GCF_000257925.1_PspF0472v1.0	GCF_000257925.1	24178	306	2945767
Negative	Bacteria	Bacteroidetes	Bacteroidia	Bacteroidales	Prevotellaceae	Prevotella	veroralis	DSM 19559	Prevotella_veroralis_DSM_19559.mat	SEQF2511	1122993	ftp://ftp.ncbi.nlm.nih.gov/genomes/all/GCF/000/377/625/GCF_000377625.1_ASM37762v1	GCF_000377625.1	29670	572	2842435
Negative	Bacteria	Bacteroidetes	Bacteroidia	Bacteroidales	Prevotellaceae	Prevotella	veroralis	JCM 6290	Prevotella_veroralis_JCM_6290.mat	SEQF2688	1234673	ftp://ftp.ncbi.nlm.nih.gov/genomes/refseq/bacteria/Prevotella_veroralis/all_assembly_versions/GCF_000613325.1_ASM61332v1	GCF_000613325.1	242284	572	2834450
Negative	Bacteria	Bacteroidetes	Bacteroidia	Bacteroidales	Prevotellaceae	Prevotella	pallens	ATCC 700821	Prevotella_pallens_ATCC_700821.mat	SEQF1989	997353	ftp://ftp.ncbi.nlm.nih.gov/genomes/all/GCF/000/220/255/GCF_000220255.1_ASM22025v1	GCF_000220255.1	28900	714	3047417
Negative	Bacteria	Bacteroidetes	Bacteroidia	Bacteroidales	Prevotellaceae	Prevotella	nigrescens	ATCC 33563	Prevotella_nigrescens_ATCC_33563.mat	SEQF1893	997352	ftp://ftp.ncbi.nlm.nih.gov/genomes/all/GCF/000/220/235/GCF_000220235.1_ASM22023v1	GCF_000220235.1	28899	693	2612230
Negative	Bacteria	Bacteroidetes	Bacteroidia	Bacteroidales	Prevotellaceae	Prevotella	pleuritidis	F0068	Prevotella_pleuritidis_F0068.mat	SEQF1935	1081904	ftp://ftp.ncbi.nlm.nih.gov/genomes/all/GCF/000/468/135/GCF_000468135.1_PpleuF0068v1.0	GCF_000468135.1	206824	303	2709958
Negative	Bacteria	Bacteroidetes	Bacteroidia	Bacteroidales	Prevotellaceae	Prevotella	enoeca	JCM 12259	Prevotella_enoeca_JCM_12259.mat	SEQF2677	1235815	ftp://ftp.ncbi.nlm.nih.gov/genomes/all/GCF/000/613/405/GCF_000613405.1_ASM61340v1	GCF_000613405.1	242258	600	2784020
Negative	Bacteria	Bacteroidetes	Bacteroidia	Bacteroidales	Prevotellaceae	Prevotella	denticola	DSM 20614	Prevotella_denticola_DSM_20614.mat	SEQF2563	1122982	ftp://ftp.ncbi.nlm.nih.gov/genomes/all/GCF/000/421/205/GCF_000421205.1_ASM42120v1	GCF_000421205.1	207238	291	3056806
Negative	Bacteria	Bacteroidetes	Bacteroidia	Bacteroidales	Prevotellaceae	Prevotella	denticola	F0289	Prevotella_denticola_F0289.mat	SEQF1677	767031	ftp://ftp.ncbi.nlm.nih.gov/genomes/all/GCF/000/193/395/GCF_000193395.1_ASM19339v1	GCF_000193395.1	3366	291	2937589
Negative	Bacteria	Bacteroidetes	Bacteroidia	Bacteroidales	Prevotellaceae	Prevotella	denticola	JCM 13449	Prevotella_denticola_JCM_13449.mat	SEQF2676	1236487	ftp://ftp.ncbi.nlm.nih.gov/genomes/refseq/bacteria/Prevotella_denticola/all_assembly_versions/GCF_000613585.1_ASM61358v1	GCF_000613585.1	242257	291	3111749
Negative	Bacteria	Bacteroidetes	Bacteroidia	Bacteroidales	Prevotellaceae	Prevotella	multiformis	DSM 16608	Prevotella_multiformis_DSM_16608.mat	SEQF1986	888743	ftp://ftp.ncbi.nlm.nih.gov/genomes/all/GCF/000/191/065/GCF_000191065.1_ASM19106v1	GCF_000191065.1	3604	685	3057407
Negative	Bacteria	Bacteroidetes	Bacteroidia	Bacteroidales	Prevotellaceae	Prevotella	veroralis	F0319	Prevotella_veroralis_F0319.mat	SEQF1663	649761	ftp://ftp.ncbi.nlm.nih.gov/genomes/all/GCF/000/162/935/GCF_000162935.1_ASM16293v1	GCF_000162935.1	2777	572	2993935
Negative	Bacteria	Bacteroidetes	Bacteroidia	Bacteroidales	Prevotellaceae	Prevotella	intermedia		Prevotella_intermedia_17.mat	SEQF1065	246198	ftp://ftp.ncbi.nlm.nih.gov/genomes/all/GCF/000/261/025/GCF_000261025.1_ASM26102v1	GCF_000261025.1	26179	643	2699437
Negative	Bacteria	Bacteroidetes	Bacteroidia	Bacteroidales	Prevotellaceae	Prevotella	intermedia	ATCC 25611 = DSM 20706	Prevotella_intermedia_ATCC_25611_DSM_20706.mat	SEQF2554	1122984	ftp://ftp.ncbi.nlm.nih.gov/genomes/all/GCF/000/439/065/GCF_000439065.1_ASM43906v1	GCF_000439065.1	207239	643	2562862
Negative	Bacteria	Bacteroidetes	Bacteroidia	Bacteroidales	Prevotellaceae	Prevotella	oris	DSM 18711	Prevotella_oris_DSM_18711.mat	SEQF2510	1122989	ftp://ftp.ncbi.nlm.nih.gov/genomes/all/GCF/000/377/685/GCF_000377685.1_ASM37768v1	GCF_000377685.1	29668	311	3061169
Negative	Bacteria	Bacteroidetes	Bacteroidia	Bacteroidales	Prevotellaceae	Prevotella	oris	JCM 12252	Prevotella_oris_JCM_12252.mat	SEQF2683	1235820	ftp://ftp.ncbi.nlm.nih.gov/genomes/refseq/bacteria/Prevotella_oris/all_assembly_versions/GCF_000613505.1_ASM61350v1	GCF_000613505.1	242267	311	3077999
Negative	Bacteria	Bacteroidetes	Bacteroidia	Bacteroidales	Bacteroidaceae	Bacteroidaceae [G-1]	sp. oral taxon 272	F0290	Bacteroidetes_[G-1]_oral_taxon_272_F0290.mat	SEQF1646	888054	ftp://ftp.ncbi.nlm.nih.gov/genomes/all/GCF/000/442/105/GCF_000442105.1_BactbactF0290v01	GCF_000442105.1	216328	272	2502741
Negative	Bacteria	Bacteroidetes	Bacteroidia	Bacteroidales	Prevotellaceae	Prevotella	oralis	ATCC 33269	Prevotella_oralis_ATCC_33269.mat	SEQF1988	873533	ftp://ftp.ncbi.nlm.nih.gov/genomes/all/GCF/000/185/145/GCF_000185145.2_ASM18514v2	GCF_000185145.2	3533	705	2836154
Negative	Bacteria	Bacteroidetes	Bacteroidia	Bacteroidales	Prevotellaceae	Prevotella	saccharolytica	JCM 17484	Prevotella_saccharolytica_JCM_17484.mat	SEQF2685	1236516	ftp://ftp.ncbi.nlm.nih.gov/genomes/all/GCF/000/614/205/GCF_000614205.1_ASM61420v1	GCF_000614205.1	242273	781	2975513
Negative	Bacteria	Bacteroidetes	Bacteroidia	Bacteroidales	Prevotellaceae	Prevotella	saccharolytica	F0055	Prevotella_saccharolytica_OT_781_F0055.mat	SEQF1946	1127699	ftp://ftp.ncbi.nlm.nih.gov/genomes/all/GCF/000/318/195/GCF_000318195.2_ASM31819v2	GCF_000318195.2	29766	781	2857010
Positive	Bacteria	Firmicutes	Bacilli	Lactobacillales	Lactobacillaceae	Lactobacillus	crispatus	ST1	Lactobacillus_crispatus_ST1.mat	SEQF1930	748671	ftp://ftp.ncbi.nlm.nih.gov/genomes/all/GCF/000/091/765/GCF_000091765.1_ASM9176v1	GCF_000091765.1	3161	817	2043161
Positive	Bacteria	Firmicutes	Bacilli	Lactobacillales	Lactobacillaceae	Lactobacillus	brevis	ATCC 367	Lactobacillus_brevis_ATCC_367.mat	SEQF1252	387344	ftp://ftp.ncbi.nlm.nih.gov/genomes/all/GCF/000/014/465/GCF_000014465.1_ASM1446v1	GCF_000014465.1	1174	558	2340228
Positive	Bacteria	Firmicutes	Bacilli	Lactobacillales	Lactobacillaceae	Lactobacillus	iners	DSM 13335	Lactobacillus_iners_DSM_13335.mat	SEQF1770	525328	ftp://ftp.ncbi.nlm.nih.gov/genomes/all/GCF/000/160/875/GCF_000160875.1_ASM16087v1	GCF_000160875.1	2008	838	1277649
Positive	Bacteria	Firmicutes	Bacilli	Lactobacillales	Lactobacillaceae	Lactobacillus	acidophilus	NCFM	Lactobacillus_acidophilus_NCFM.mat	SEQF1073	272621	ftp://ftp.ncbi.nlm.nih.gov/genomes/all/GCF/000/011/985/GCF_000011985.1_ASM1198v1	GCF_000011985.1	610	529	1993560
Positive	Bacteria	Firmicutes	Bacilli	Lactobacillales	Lactobacillaceae	Lactobacillus	jensenii		Lactobacillus_jensenii_1153.mat	SEQF1649	440497	ftp://ftp.ncbi.nlm.nih.gov/genomes/all/GCF/000/155/915/GCF_000155915.2_Lacto_jensenii_1153_V2	GCF_000155915.2	1482	839	1756479
Positive	Bacteria	Firmicutes	Bacilli	Lactobacillales	Lactobacillaceae	Lactobacillus	gasseri	ATCC 33323	Lactobacillus_gasseri_ATCC_33323.mat	SEQF1255	324831	ftp://ftp.ncbi.nlm.nih.gov/genomes/all/GCF/000/014/425/GCF_000014425.1_ASM1442v1	GCF_000014425.1	893	615	1894360
Positive	Bacteria	Firmicutes	Bacilli	Lactobacillales	Lactobacillaceae	Lactobacillus	johnsonii	NCC 533	Lactobacillus_johnsonii_NCC_533.mat	SEQF1026	257314	ftp://ftp.ncbi.nlm.nih.gov/genomes/all/GCF/000/008/065/GCF_000008065.1_ASM806v1	GCF_000008065.1	527	819	1992676
Negative	Bacteria	Actinobacteria	Actinobacteria	Actinomycetales	Actinomycetaceae	Arcanobacterium	haemolyticum	DSM 20595, CCM, ATCC 9345	Arcanobacterium_haemolyticum_DSM_20595.mat	SEQF1187	644284	ftp://ftp.ncbi.nlm.nih.gov/genomes/all/GCF/000/092/365/GCF_000092365.1_ASM9236v1	GCF_000092365.1	2746	811	1986154
Positive	Bacteria	Firmicutes	Clostridia	Clostridiales	Peptoniphilaceae	Peptoniphilus	lacrimalis	315-B	Peptoniphilus_lacrimalis_315-B.mat	SEQF1795	596330	ftp://ftp.ncbi.nlm.nih.gov/genomes/all/GCF/000/176/955/GCF_000176955.1_ASM17695v1	GCF_000176955.1	2614	836	1699205
Positive	Bacteria	Firmicutes	Clostridia	Clostridiales	Peptoniphilaceae	Peptoniphilus	lacrimalis	DSM 7455	Peptoniphilus_lacrimalis_DSM_7455.mat	SEQF2505	1122949	ftp://ftp.ncbi.nlm.nih.gov/genomes/all/GCF/000/378/725/GCF_000378725.1_ASM37872v1	GCF_000378725.1	29655	836	1849103
Negative	Bacteria	Bacteroidetes	Bacteroidia	Bacteroidales	Prevotellaceae	Alloprevotella	sp. oral taxon 473	F0040	Prevotella_oral_taxon_473_F0040.mat	SEQF1899	1035197	ftp://ftp.ncbi.nlm.nih.gov/genomes/all/GCF/000/318/095/GCF_000318095.2_ASM31809v2	GCF_000318095.2	29108	473	2552288
Negative	Bacteria	Chlamydiae	Chlamydiia	Chlamydiales	Chlamydiaceae	Chlamydophila	pneumoniae	TW-183	Chlamydophila_pneumoniae_TW-183.mat	SEQF1182	182082	ftp://ftp.ncbi.nlm.nih.gov/genomes/all/GCF/000/007/205/GCF_000007205.1_ASM720v1	GCF_000007205.1	176	733	1225935
Negative	Bacteria	Bacteroidetes	Bacteroidia	Bacteroidales	Porphyromonadaceae	Tannerella	sp. oral taxon 286	isolate Cell 1/3	Tannerella_sp._oral_taxon_286_Cell_1_3.mat	SEQF2634	1411022	ftp://ftp.ncbi.nlm.nih.gov/genomes/refseq/bacteria/Tannerella_sp._oral_taxon_HOT-286/all_assembly_versions/suppressed/GCF_000510545.1_BU063sc13	GCF_000510545.1	213494	286	2785640
Negative	Bacteria	Bacteroidetes	Bacteroidia	Bacteroidales	Porphyromonadaceae	Tannerella	sp. oral taxon 286	isolate Cell 8/11	Tannerella_sp._oral_taxon_286_Cell_8_11.mat	SEQF2638	1411915	ftp://ftp.ncbi.nlm.nih.gov/genomes/refseq/bacteria/Tannerella_sp._oral_taxon_HOT-286/all_assembly_versions/suppressed/GCF_000510565.1_BU063sc811	GCF_000510565.1	213603	286	2665364
Negative	Bacteria	Spirochaetes	Spirochaetia	Spirochaetales	Spirochaetaceae	Treponema	maltophilum	ATCC 51939	Treponema_maltophilum_ATCC_51939.mat	SEQF1941	1125699	ftp://ftp.ncbi.nlm.nih.gov/genomes/all/GCF/000/413/055/GCF_000413055.1_Trep_malt_ATCC_51939_V1	GCF_000413055.1	29749	664	2527074
Positive	Bacteria	Firmicutes	Clostridia	Clostridiales	Peptoniphilaceae	Anaerococcus	tetradius	ATCC 35098	Anaerococcus_tetradius_ATCC_35098.mat	SEQF1728	525255	ftp://ftp.ncbi.nlm.nih.gov/genomes/all/GCF/000/159/095/GCF_000159095.1_ASM15909v1	GCF_000159095.1	1981	788	2145347
Negative	Bacteria	Spirochaetes	Spirochaetia	Spirochaetales	Spirochaetaceae	Treponema	socranskii	ATCC 35535	Treponema_socranskii_paredis_ATCC_35535.mat	SEQF1942	1125701	ftp://ftp.ncbi.nlm.nih.gov/genomes/all/GCF/000/413/015/GCF_000413015.1_Trep_socr_subsp_paredis_ATCC_35535_V1	GCF_000413015.1	29751	769	2731774
Positive	Bacteria	Firmicutes	Clostridia	Clostridiales	Peptoniphilaceae	Peptoniphilus	indolicus	ATCC 29427	Peptoniphilus_indolicus_ATCC_29427.mat	SEQF1974	997350	ftp://ftp.ncbi.nlm.nih.gov/genomes/all/GCF/000/227/315/GCF_000227315.1_ASM22731v1	GCF_000227315.1	28898	840	2101630
Positive	Bacteria	Firmicutes	Erysipelotrichia	Erysipelotrichales	Erysipelotrichaceae	Erysipelothrix	tonsillarum	DSM 14972	Erysipelothrix_tonsillarum_DSM_14972.mat	SEQF2490	1121874	ftp://ftp.ncbi.nlm.nih.gov/genomes/all/GCF/000/373/785/GCF_000373785.1_ASM37378v1	GCF_000373785.1	29604	484	1930392
Negative	Bacteria	Spirochaetes	Spirochaetia	Spirochaetales	Spirochaetaceae	Treponema	medium	ATCC 700293	Treponema_medium_ATCC_700293.mat	SEQF1940	1125700	ftp://ftp.ncbi.nlm.nih.gov/genomes/all/GCF/000/413/035/GCF_000413035.1_Trep_medi_ATCC_700293_V1	GCF_000413035.1	29750	667	2715791
Negative	Bacteria	Spirochaetes	Spirochaetia	Spirochaetales	Spirochaetaceae	Treponema	vincentii	ATCC 35580	Treponema_vincentii_ATCC_35580.mat	SEQF1610	596324	ftp://ftp.ncbi.nlm.nih.gov/genomes/all/GCF/000/175/895/GCF_000175895.1_ASM17589v1	GCF_000175895.1	2608	29	2514590
Positive	Bacteria	Firmicutes	Clostridia	Clostridiales	Peptoniphilaceae	Peptoniphilus	lacrimalis	F0141	Peptoniphilus_oral_taxon_836_F0141.mat	SEQF1681	768724	ftp://ftp.ncbi.nlm.nih.gov/genomes/all/GCF/000/179/335/GCF_000179335.1_ASM17933v1	GCF_000179335.1	3379	836	1625156
Positive	Bacteria	Firmicutes	Clostridia	Clostridiales	Peptoniphilaceae	Peptoniphilus	sp. oral taxon 386	F0131	Peptoniphilus_oral_taxon_386_F0131.mat	SEQF1472	575609	ftp://ftp.ncbi.nlm.nih.gov/genomes/all/GCF/000/090/945/GCF_000090945.1_ASM9094v1	GCF_000090945.1	2465	386	1569385
Positive	Bacteria	Firmicutes	Bacilli	Lactobacillales	Carnobacteriaceae	Alloiococcus	otitis	ATCC 51267	Alloiococcus_otitis_ATCC_51267.mat	SEQF2412	883081	ftp://ftp.ncbi.nlm.nih.gov/genomes/all/GCF/000/315/445/GCF_000315445.1_Allo_otit_ATCC_51267_V1	GCF_000315445.1	28021	831	1784056
Positive	Bacteria	Firmicutes	Erysipelotrichia	Erysipelotrichales	Erysipelotrichaceae	Bulleidia	extructa	W1219, ATCC BAA-170, DSM 13220	Bulleidia_extructa_W1219.mat	SEQF1730	679192	ftp://ftp.ncbi.nlm.nih.gov/genomes/all/GCF/000/177/375/GCF_000177375.1_ASM17737v1	GCF_000177375.1	2936	603	1419583
Positive	Bacteria	Firmicutes	Erysipelotrichia	Erysipelotrichales	Erysipelotrichaceae	Solobacterium	moorei	DSM 22971	Solobacterium_moorei_DSM_22971.mat	SEQF2585	1123263	ftp://ftp.ncbi.nlm.nih.gov/genomes/all/GCF/000/425/005/GCF_000425005.1_ASM42500v1	GCF_000425005.1	207281	678	2335456
Positive	Bacteria	Firmicutes	Erysipelotrichia	Erysipelotrichales	Erysipelotrichaceae	Solobacterium	moorei	F0204	Solobacterium_moorei_F0204.mat	SEQF1683	706433	ftp://ftp.ncbi.nlm.nih.gov/genomes/all/GCF/000/186/945/GCF_000186945.2_ASM18694v2	GCF_000186945.2	3055	678	2008040
Positive	Bacteria	Firmicutes	Bacilli	Lactobacillales	Carnobacteriaceae	Granulicatella	adiacens	ATCC 49175	Granulicatella_adiacens_ATCC_49175.mat	SEQF1605	638301	ftp://ftp.ncbi.nlm.nih.gov/genomes/all/GCF/000/160/675/GCF_000160675.1_ASM16067v1	GCF_000160675.1	2710	534	1947166
Positive	Bacteria	Firmicutes	Clostridia	Clostridiales	Peptoniphilaceae	Finegoldia	magna	ATCC 29328	Finegoldia_magna_ATCC_29328.mat	SEQF2435	334413	ftp://ftp.ncbi.nlm.nih.gov/genomes/all/GCF/000/010/185/GCF_000010185.1_ASM1018v1	GCF_000010185.1	927	662	1986740
Positive	Bacteria	Firmicutes	Clostridia	Clostridiales	Peptoniphilaceae	Finegoldia	magna	BVS033A4	Finegoldia_magna_BVS033A4.mat	SEQF2062	866773	ftp://ftp.ncbi.nlm.nih.gov/genomes/all/GCF/000/179/695/GCF_000179695.1_ASM17969v1	GCF_000179695.1	3460	662	1991180
Positive	Bacteria	Firmicutes	Clostridia	Clostridiales	Peptoniphilaceae	Anaerococcus	lactolyticus	ATCC 51172	Anaerococcus_lactolyticus_ATCC_51172.mat	SEQF1982	525254	ftp://ftp.ncbi.nlm.nih.gov/genomes/all/GCF/000/156/575/GCF_000156575.1_ASM15657v1	GCF_000156575.1	1980	859	2206675
Positive	Bacteria	Firmicutes	Clostridia	Clostridiales	Peptoniphilaceae	Peptoniphilaceae [G-1]	sp. oral taxon 113	W5053	Peptostreptococcacea_[13][G-1]_oral_taxon_113_W5053.mat	SEQF2443	1321784	ftp://ftp.ncbi.nlm.nih.gov/genomes/all/GCF/000/467/935/GCF_000467935.1_ASM46793v1	GCF_000467935.1	209878	113	2085153
Positive	Bacteria	Firmicutes	Clostridia	Clostridiales	Peptoniphilaceae	Anaerococcus	prevotii	DSM 20548, PC1, ATCC 9321	Anaerococcus_prevotii_DSM_20548.mat	SEQF1083	525919	ftp://ftp.ncbi.nlm.nih.gov/genomes/all/GCF/000/024/105/GCF_000024105.1_ASM2410v1	GCF_000024105.1	2043	738	1998633
Positive	Bacteria	Firmicutes	Clostridia	Clostridiales	Peptostreptococcaceae [XI]	Mogibacterium	timidum	ATCC 33093	Mogibacterium_timidum_ATCC_33093.mat	SEQF2630	1401079	ftp://ftp.ncbi.nlm.nih.gov/genomes/all/GCF/000/525/775/GCF_000525775.1_MtimATCC33093v1.0	GCF_000525775.1	212219	42	1806210
Positive	Bacteria	Firmicutes	Clostridia	Clostridiales	Peptoniphilaceae	Parvimonas	sp. oral taxon 393	F0440	Parvimonas_oral_taxon_393_F0440.mat	SEQF1857	944565	ftp://ftp.ncbi.nlm.nih.gov/genomes/all/GCF/000/223/315/GCF_000223315.1_ASM22331v1	GCF_000223315.1	28501	393	1483165
Negative	Bacteria	Spirochaetes	Spirochaetia	Spirochaetales	Spirochaetaceae	Treponema	lecithinolyticum	OMZ 684T	Treponema_lecithinolyticum_OMZ_684T.mat	SEQF1060	53418	ftp://ftp.ncbi.nlm.nih.gov/genomes/refseq/bacteria/Treponema_lecithinolyticum/all_assembly_versions/GCF_000468055.1_ASM46805v1	GCF_000468055.1	209881	653	2338485	Not found (strain "ATCC 700332" also in Kbase)
Positive	Bacteria	Firmicutes	Clostridia	Clostridiales	Peptoniphilaceae	Parvimonas	micra	ATCC 33270	Parvimonas_micra_ATCC_33270.mat	SEQF1029	411465	ftp://ftp.ncbi.nlm.nih.gov/genomes/all/GCF/000/154/405/GCF_000154405.1_ASM15440v1	GCF_000154405.1	1360	111	1703872
Positive	Bacteria	Firmicutes	Clostridia	Clostridiales	Peptoniphilaceae	Parvimonas	sp. oral taxon 110	F0139	Parvimonas_oral_taxon_110_F0139.mat	SEQF1676	767100	ftp://ftp.ncbi.nlm.nih.gov/genomes/all/GCF/000/214/475/GCF_000214475.1_ASM21447v1	GCF_000214475.1	3367	110	1556464
Positive	Bacteria	Firmicutes	Clostridia	Clostridiales	Peptoniphilaceae	Peptoniphilus	sp. oral taxon 375	F0436	Peptoniphilus_oral_taxon_375_F0436.mat	SEQF1855	879308	ftp://ftp.ncbi.nlm.nih.gov/genomes/all/GCF/000/221/565/GCF_000221565.1_ASM22156v1	GCF_000221565.1	27979	375	1950550
Positive	Bacteria	Firmicutes	Clostridia	Clostridiales	Peptostreptococcaceae [XI]	Peptostreptococcaceae [XI][G-1]	[Eubacterium] infirmum	F0142	Eubacterium_infirmum_F0142.mat	SEQF1695	883109	ftp://ftp.ncbi.nlm.nih.gov/genomes/all/GCF/000/242/675/GCF_000242675.1_Euba_infi_F0142_V1	GCF_000242675.1	28027	105	1900824
Positive	Bacteria	Firmicutes	Clostridia	Clostridiales	Peptostreptococcaceae [XI]	Peptostreptococcus	stomatis	DSM 17678, W2278	Peptostreptococcus_stomatis_DSM_17678.mat	SEQF1393	596315	ftp://ftp.ncbi.nlm.nih.gov/genomes/all/GCF/000/147/675/GCF_000147675.1_ASM14767v1	GCF_000147675.1	2602	112	1988044
Positive	Bacteria	Firmicutes	Clostridia	Clostridiales	Peptostreptococcaceae [XI]	Peptostreptococcus	anaerobius	653-L	Peptostreptococcus_anaerobius_653-L.mat	SEQF1921	596329	ftp://ftp.ncbi.nlm.nih.gov/genomes/all/GCF/000/178/095/GCF_000178095.1_ASM17809v1	GCF_000178095.1	2613	542	2083092
Positive	Bacteria	Firmicutes	Clostridia	Clostridiales	Peptostreptococcaceae [XI]	Peptostreptococcus	anaerobius	DSM 2949	Peptostreptococcus_anaerobius_DSM_2949.mat	SEQF2506	1122950	ftp://ftp.ncbi.nlm.nih.gov/genomes/refseq/bacteria/Peptostreptococcus_anaerobius/all_assembly_versions/GCF_000318115.1_ASM31811v1	GCF_000318115.1	29656	542	2106123
Negative	Archaea	Euryarchaeota	Methanobacteria	Methanobacteriales	Methanobacteriaceae	Methanobrevibacter	oralis	JMR01	Methanobrevibacter_oralis_JMR01.mat	SEQF2671	1415626	ftp://ftp.ncbi.nlm.nih.gov/genomes/refseq/archaea/Methanobrevibacter_oralis/all_assembly_versions/GCF_000529525.1_Methanobrevibacter_oralis_JMR01	GCF_000529525.1	238715	815	2083511
Positive	Bacteria	Firmicutes	Clostridia	Clostridiales	Peptostreptococcaceae [XI]	Peptostreptococcaceae [XI][G-5]	[Eubacterium] saphenum	ATCC 49989	Eubacterium_saphenum_ATCC_49989.mat	SEQF1017	592031	ftp://ftp.ncbi.nlm.nih.gov/genomes/all/GCF/000/161/975/GCF_000161975.1_ASM16197v1	GCF_000161975.1	2572	759	1084901
Negative	Bacteria	Actinobacteria	Coriobacteriia	Eggerthellales	Eggerthellaceae	Eggerthella	lenta	DSM 2243, VPI 0255	Eggerthella_lenta_DSM_2243.mat	SEQF1498	479437	ftp://ftp.ncbi.nlm.nih.gov/genomes/all/GCF/000/024/265/GCF_000024265.1_ASM2426v1	GCF_000024265.1	1739	654	3632260
Negative	Bacteria	Actinobacteria	Coriobacteriia	Coriobacteriales	Atopobiaceae	Olsenella	uli	DSM 7084, VPI, ATCC 49627	Olsenella_uli_DSM_7084.mat	SEQF1031	633147	ftp://ftp.ncbi.nlm.nih.gov/genomes/all/GCF/000/143/845/GCF_000143845.1_ASM14384v1	GCF_000143845.1	2670	38	2051896
Negative	Bacteria	Actinobacteria	Coriobacteriia	Coriobacteriales	Atopobiaceae	Olsenella	sp. oral taxon 809	F0356	Olsenella_oral_taxon_809_F0356.mat	SEQF1670	661087	ftp://ftp.ncbi.nlm.nih.gov/genomes/all/GCF/000/233/535/GCF_000233535.1_Olsenella_sp_F0356_V1	GCF_000233535.1	27102	809	2159805
Negative	Bacteria	Spirochaetes	Spirochaetia	Spirochaetales	Spirochaetaceae	Treponema	denticola	ATCC 35405, DSM 14222	Treponema_denticola_ATCC_35405.mat	SEQF1061	243275	ftp://ftp.ncbi.nlm.nih.gov/genomes/all/GCF/000/008/185/GCF_000008185.1_ASM818v1	GCF_000008185.1	494	584	2843201
Positive	Bacteria	Actinobacteria	Actinobacteria	Bifidobacteriales	Bifidobacteriaceae	Gardnerella	vaginalis	ATCC 14019	Gardnerella_vaginalis_ATCC_14019.mat	SEQF1757	525284	ftp://ftp.ncbi.nlm.nih.gov/genomes/all/GCF/000/159/155/GCF_000159155.2_ASM15915v2	GCF_000159155.2	1999	829	1667350
Negative	Bacteria	Actinobacteria	Coriobacteriia	Coriobacteriales	Coriobacteriaceae	Atopobium	sp. oral taxon 810	F0209	Atopobium_oral_taxon_810_F0209.mat	SEQF2455	1321773	ftp://ftp.ncbi.nlm.nih.gov/genomes/all/GCF/000/466/405/GCF_000466405.1_ASM46640v1	GCF_000466405.1	209871	810	1945857
Positive	Bacteria	Actinobacteria	Actinobacteria	Bifidobacteriales	Bifidobacteriaceae	Scardovia	wiggsiae	F0424	Scardovia_wiggsiae_F0424.mat	SEQF1853	857290	ftp://ftp.ncbi.nlm.nih.gov/genomes/all/GCF/000/269/605/GCF_000269605.1_PB_Scar_wigg_F0424_V1	GCF_000269605.1	27810	195	1550817
Positive	Bacteria	Actinobacteria	Coriobacteriia	Coriobacteriales	Coriobacteriaceae	Atopobium	minutum		Atopobium_minutum_10063974.mat	SEQF2483	997872	ftp://ftp.ncbi.nlm.nih.gov/genomes/all/GCF/000/364/325/GCF_000364325.1_Atop_minu_V1	GCF_000364325.1	32451	674	1706361
Positive	Bacteria	Actinobacteria	Actinobacteria	Bifidobacteriales	Bifidobacteriaceae	Parascardovia	denticolens	DSM 10105	Parascardovia_denticolens_DSM_10105.mat	SEQF2021	864564	ftp://ftp.ncbi.nlm.nih.gov/genomes/all/GCF/000/191/785/GCF_000191785.1_ASM19178v1	GCF_000191785.1	3447	586	1891248
Positive	Bacteria	Actinobacteria	Actinobacteria	Bifidobacteriales	Bifidobacteriaceae	Parascardovia	denticolens	F0305	Parascardovia_denticolens_F0305.mat	SEQF1655	641144	ftp://ftp.ncbi.nlm.nih.gov/genomes/all/GCF/000/163/835/GCF_000163835.1_Paras_denticolens_F0305	GCF_000163835.1	2727	586	1897118
Positive	Bacteria	Actinobacteria	Actinobacteria	Bifidobacteriales	Bifidobacteriaceae	Scardovia	inopinata	F0304, DSM 10107	Scardovia_inopinata_F0304.mat	SEQF1654	641146	ftp://ftp.ncbi.nlm.nih.gov/genomes/all/GCF/000/163/755/GCF_000163755.1_ASM16375v1	GCF_000163755.1	2728	642	1804013
Positive	Bacteria	Actinobacteria	Coriobacteriia	Coriobacteriales	Coriobacteriaceae	Atopobium	vaginae	DSM 15829	Atopobium_vaginae_DSM_15829.mat	SEQF1729	525256	ftp://ftp.ncbi.nlm.nih.gov/genomes/all/GCF/000/159/235/GCF_000159235.2_ASM15923v2	GCF_000159235.2	1983	814	1418601
Positive	Bacteria	Actinobacteria	Coriobacteriia	Coriobacteriales	Coriobacteriaceae	Atopobium	parvulum	DSM 20469, IPP 1246, ATCC 33793	Atopobium_parvulum_DSM_20469.mat	SEQF1084	521095	ftp://ftp.ncbi.nlm.nih.gov/genomes/all/GCF/000/024/225/GCF_000024225.1_ASM2422v1	GCF_000024225.1	1956	723	1543805
Negative	Bacteria	Actinobacteria	Coriobacteriia	Coriobacteriales	Coriobacteriaceae	Atopobium	rimae	ATCC 49626, VPI D140H-11A	Atopobium_rimae_ATCC_49626.mat	SEQF1003	553184	ftp://ftp.ncbi.nlm.nih.gov/genomes/all/GCF/000/174/015/GCF_000174015.1_ASM17401v1	GCF_000174015.1	2245	750	1626291
Negative	Bacteria	Actinobacteria	Coriobacteriia	Coriobacteriales	Coriobacteriaceae	Atopobium	sp. oral taxon 199	F0494	Atopobium_oral_taxon_199_F0494.mat	SEQF1949	1203602	ftp://ftp.ncbi.nlm.nih.gov/genomes/all/GCF/000/411/555/GCF_000411555.1_Atop_sp_oral_taxon_199_F0494_V1	GCF_000411555.1	31098	199	1660282
