# Supplementary material for: Metabolic network percolation quantifies biosynthetic capabilities across the human oral microbiome
Source: eLife. 2019 Jun 13;8:e39733. doi: 10.7554/eLife.39733 (PMC6609349; doi:10.7554/eLife.39733)
Supplement: Supplementary file 5. — Metadata related to the metabolites analyzed in this work is provided. [file elife-39733-supp5.xlsx]

## Sheet: Sheet1
Gram Negative	Gram Positive	class	model SEED ID	metabolite name
1	1	cofactor	cpd00118	Putrescine
1	1	protein	cpd00156	L-Valine
1	1	protein	cpd00322	L-Isoleucine
1	1	cofactor	cpd00016	Pyridoxal phosphate
1	1	protein	cpd00132	L-Asparagine
1	1	protein	cpd00129	L-Proline
1	1	protein	cpd00051	L-Arginine
1	1	protein	cpd00119	L-Histidine
1	1	cellwall	cpd02229	Bactoprenyl diphosphate
1	1	cofactor	cpd00056	Thiamin diphosphate
1	1	protein	cpd00039	L-Lysine
1	1	protein	cpd00066	L-Phenylalanine
1	1	protein	cpd00069	L-Tyrosine
1	1	cofactor	cpd00015	Flavin adenine dinucleotide
1	1	cofactor	cpd00220	Riboflavin
1	1	protein	cpd00054	L-Serine
1	1	dna	cpd00357	Thymidine-triphosphate
1	1	rna	cpd00038	Guanosine-triphosphate
1	1	dna	cpd00241	Deoxyguanosine-triphosphate
1	1	protein	cpd00161	L-Threonine
1	1	protein	cpd00107	L-Leucine
1	1	protein	cpd00084	L-Cysteine
1	1	protein	cpd00060	L-Methionine
1	1	cofactor	cpd00017	S-Adenosyl-L-methionine
1	1	cofactor	cpd11493	Acyl carrier protien
1	1	dna	cpd00356	Deoxycytidine-triphosphate
1	1	dna	cpd00115	Deoxyadenosine-triphosphate
1	1	protein	cpd00035	L-Alanine
1	1	cofactor	cpd00010	Coenzyme A
1	1	protein	cpd00041	L-Aspartate
1	1	other	cpd00001	H2O
1	1	protein	cpd00033	Glycine
1	1	rna	cpd00052	Cytidine-triphosphate
1	1	rna	cpd00002	Adenosine-triphosphate
1	1	rna	cpd00062	Uridine-triphosthate
1	1	protein	cpd00023	L-Glutamate
1	1	protein	cpd00053	L-Glutamine
1	1	cofactor	cpd00003	Nicotinamide adenine dinucleotide
1	1	cofactor	cpd00006	Nicotinamide adenine dinucleotide phosphate
1	1	cofactor	cpd00201	10-Formyltetrahydrofolate
1	1	cofactor	cpd00087	Tetrahydrofolate
1	1	metal ion	cpd00149	Co2+
1	1	cofactor	cpd00166	Cobamamide
0	1	cellwall	cpd15775	Stearoyllipoteichoic acid n=24 linked D-alanine substituted
0	1	cellwall	cpd15776	Isoheptadecanoyllipoteichoic acid n=24 linked D-alanine substituted
0	1	cellwall	cpd15777	Anteisoheptadecanoyllipoteichoic acid n=24 linked D-alanine substituted
0	1	cellwall	cpd15668	Glycerol teichoic acid n=45 linked D-ala substituted
0	1	cellwall	cpd15667	Glycerol teichoic acid n=45 linked unsubstituted
0	1	cellwall	cpd15669	Glycerol teichoic acid n=45 linked glucose substituted
0	1	cellwall	cpd15757	Stearoyllipoteichoic acid n=24 linked glucose substituted
0	1	cellwall	cpd15758	Isoheptadecanoyllipoteichoic acid n=24 linked glucose substituted
0	1	cellwall	cpd15759	Anteisoheptadecanoyllipoteichoic acid n=24 linked glucose substituted
1	1	cofactor	cpd00557	Siroheme
0	1	cellwall	cpd11459	Acetylgalactosamine glucose phosphate
1	0	cellwall	cpd15432	Core oligosaccharide lipid A
1	1	metal ion	cpd00254	Mg2+
1	1	metal ion	cpd00034	Zn2+
1	1	metal ion	cpd00030	Mn2+
1	1	metal ion	cpd00058	Cu2+
1	1	metal ion	cpd00205	K+
1	1	metal ion	cpd00063	Ca2+
1	1	lipid	cpd15533	Phosphatidylethanolamine dioctadecanoyl
1	1	lipid	cpd15695	Diisoheptadecanoylphosphatidylethanolamine
1	1	lipid	cpd15696	Dianteisoheptadecanoylphosphatidylethanolamine
1	1	protein	cpd00065	L-Tryptophan
1	1	cofactor	cpd00345	5-Methyltetrahydrofolate
1	1	cofactor	cpd00042	Glutathione
1	1	lipid	cpd15793	Stearoylcardiolipin
1	1	lipid	cpd15794	Isoheptadecanoylcardiolipin
1	1	lipid	cpd15795	Anteisoheptadecanoylcardiolipin
1	1	lipid	cpd15540	Phosphatidylglycerol dioctadecanoyl
1	1	lipid	cpd15722	Diisoheptadecanoylphosphatidylglycerol
1	1	lipid	cpd15723	Dianteisoheptadecanoylphosphatidylglycerol
1	1	cofactor	cpd00264	Spermidine
1	1	metal ion	cpd00099	Cl-
1	1	cofactor	cpd00028	Heme
0	1	cellwall	cpd15767	Isoheptadecanoyllipoteichoic acid n=24 linked N-acetyl-D-glucosamine
0	1	cellwall	cpd15766	Stearoyllipoteichoic acid n=24 linked N-acetyl-D-glucosamine
0	1	cellwall	cpd15768	Anteisoheptadecanoyllipoteichoic acid n=24 linked N-acetyl-D-glucosamine
0	1	cellwall	cpd15749	Isoheptadecanoyllipoteichoic acid n=24 linked unsubstituted
0	1	cellwall	cpd15748	Stearoyllipoteichoic acid n=24 linked unsubstituted
0	1	cellwall	cpd15750	Anteisoheptadecanoyllipoteichoic acid n=24 linked unsubstituted
1	1	metal ion	cpd10516	Fe3+
1	1	metal ion	cpd10515	Fe2+
1	1	cellwall	cpd15665	Peptidoglycan polymer
1	1	cofactor	cpd15500	Menaquinone-8
1	1	cofactor	cpd15560	Ubiquinone-8
1	1	cofactor	cpd15352	2-Demethylmenaquinone-8
0	0	organic acid	cpd00029	Acetate
0	0	organic acid	cpd00159	L-Lactate
0	0	organic acid	cpd00221	D-Lactate
0	0	organic acid	cpd00211	Butyrate
0	0	organic acid	cpd01711	Isobutyrate
0	0	organic acid	cpd00036	Succinate
0	0	organic acid	cpd00047	Formate
0	0	organic acid	cpd00141	Propionate
0	0	organic acid	cpd05178	Isovaleric acid
