# Supplementary material for: Metabolic network percolation quantifies biosynthetic capabilities across the human oral microbiome
Source: eLife. 2019 Jun 13;8:e39733. doi: 10.7554/eLife.39733 (PMC6609349; doi:10.7554/eLife.39733)
Supplement: Supplementary file 6. — The producibility metric (PM) for each organism (shown in Figure 4) is provided. [file elife-39733-supp6.xlsx]

## Sheet: supplementary_tables_2_y17m10d2
	Candidate_division_SR1_bacterium_MGEHA	TM7[G-1]_oral_taxon_488_AC001	TM7[G-1]_oral_taxon_952_TM7x	TM7[G-1]_oral_taxon_955_PM004	Treponema_pallidum_pallidum_Nichols	Mycoplasma_salivarium_ATCC_23064	Mycoplasma_fermentans_M64	Mycoplasma_fermentans_JER	Mycoplasma_orale_ATCC_23714	Mycoplasma_hominis_ATCC_23114	Mycoplasma_hominis_ATCC_27545	Mycoplasma_pneumoniae_M129	Mycoplasma_genitalium_G-37	Desulfobulbus_oral_taxon_041_Dsb2	Desulfobulbus_oral_taxon_041_Dsb3	Chloroflexi_bacterium_oral_taxon_439_isolate_Chl2	Clostridiales_[F-1][G-1]_oral_taxon_876_F0540	Lactobacillus_catenaforme_OT_569_DSM_20559	Pyramidobacter_piscolens_W5455	Bacillus_subtilis_BSn5	Bacillus_anthracis_A0248	Enterococcus_durans_ATCC_6056	Enterococcus_saccharolyticus_30_1	Enterococcus_durans_FB129-CNAB-4	Enterococcus_faecalis_V583	Staphylococcus_epidermidis_RP62A	Staphylococcus_caprae_C87	Staphylococcus_epidermidis_W23144	Staphylococcus_warneri_L37603	Staphylococcus_aureus_aureus_JH1	Staphylococcus_aureus_aureus_WW2703_97	Lactobacillus_parafarraginis_F0439	Lactococcus_lactis_lactis_IL1403	Lactococcus_lactis_lactis_KF147	Lactobacillus_pentosus_KCA1	Lactobacillus_plantarum_plantarum_ATCC_14917	Lactobacillus_plantarum_plantarum_ST-III	Lactobacillus_kisonensis_F0435	Listeria_monocytogenes_08-5578	Listeria_monocytogenes_serotype_4b_CLIP_80459	Lactobacillus_buchneri_NRRL_B-30929	Lactobacillus_buchneri_ATCC_11577	Pseudopropionibacterium_propionicum_F0700	Propionibacterium_propionicum_F0230a	Eubacterium_yurii_margaretiae_ATCC_43715	Oribacterium_sinus_F0268	Oribacterium_oral_taxon_078_F0262	Lachnospiraceae_bacterium_ACC2	Johnsonella_ignava_ATCC_51276
Putrescine	0	0.505225	0	0	0	0	0	0	0	0	0	0	0	0	0.788404	0	0.832142	0.864515	0.897034	0.996664	0.996223	0.859996	0.995475	0.865191	0.860902	0.995727	0.918285	0.995388	0.995576	0.995568	0.995902	0.995106	0.995014	0.995565	0.965154	0.965807	0.966199	0.956962	0.995684	0.995788	0.970402	0.995014	0.995318	0.995086	0.82795	0.87817	0.881877	0.829336	0.883755
L-Valine	0	0	0	0	0	0	0	0	0	0	0	0	0	0.502309	0	0.501529	0.778656	0	0	0.996646	0.996215	0.785945	0.995488	0.784234	0.774343	0.995695	0.995299	0.995371	0.99559	0.99555	0.995897	0.994743	0.994948	0.995554	0.782364	0.782071	0.782585	0.782341	0.995587	0.995705	0.784262	0.995126	0.995318	0.995048	0.991399	0.993405	0.993829	0.99026	0.993915
L-Isoleucine	0	0	0	0	0	0	0	0	0	0	0	0	0	0.506626	0	0.507393	0.502123	0	0	0.996637	0.996222	0.497037	0.995477	0.50524	0.493132	0.995674	0.995278	0.995365	0.995606	0.995545	0.995864	0.994938	0.994901	0.995524	0.50095	0.506429	0.497026	0.495447	0.995585	0.995718	0.498294	0.995099	0.995537	0.995053	0.991441	0.977736	0.993776	0.990506	0.927591
Pyridoxal phosphate	0	0	0	0	0	0	0	0	0	0	0	0	0	0	0	0.497533	0	0.504543	0.501293	0.995912	0.995424	0	0.493085	0	0.502934	0.99452	0.994735	0.994418	0.994553	0.994664	0.994925	0.991827	0.493526	0.502968	0.50764	0.498123	0.506845	0.496699	0.994778	0.995251	0.500552	0.497831	0.857573	0.857918	0.503452	0.500457	0.507318	0.503987	0.507318
L-Asparagine	0.502226	0.489841	0.505295	0.511228	0.901009	0.895239	0.897798	0.896789	0.894007	0.892732	0.898858	0.501761	0.498067	0.502559	0.755841	0.4928	0.99514	0.993176	0.509885	0.501351	0.996219	0.99462	0.995438	0.994271	0.498113	0.504713	0.494966	0.493739	0.497628	0.503613	0.494203	0.994861	0.994914	0.995553	0.995178	0.994787	0.994898	0.995191	0.502575	0.50911	0.994739	0.995161	0.499012	0.510327	0.991352	0.993616	0.993843	0.990114	0.993896
L-Proline	0.497744	0.495902	0.492351	0.503507	0.941836	0.492114	0.501509	0.509031	0.507982	0.501749	0.493193	0.498022	0.504061	0.50261	0.50149	0.936722	0.779861	0.947183	0.987256	0.996638	0.996235	0.926617	0.995525	0.963562	0.964777	0.995697	0.995293	0.99538	0.995591	0.995546	0.995885	0.995216	0.994979	0.995608	0.954465	0.953602	0.952032	0.952326	0.995759	0.995801	0.959116	0.995077	0.995447	0.995074	0.961703	0.83815	0.735545	0.493518	0.925848
L-Arginine	0	0.499205	0.50062	0.503889	0.504074	0	0	0	0	0	0	0	0	0.738986	0.655804	0.807245	0.730479	0.829466	0.859669	0.996659	0.996213	0.832459	0.995477	0.747858	0.786663	0.995687	0.883249	0.995366	0.995594	0.995539	0.995872	0.995096	0.994905	0.995553	0.959129	0.944076	0.961228	0.953858	0.995685	0.995747	0.965807	0.994991	0.995305	0.99503	0.711806	0.86024	0.858802	0.506418	0.85794
L-Histidine	0.51234	0.498552	0.505926	0.49325	0.495038	0.498795	0.498079	0.504381	0.513114	0.500509	0.500176	0.500606	0.495568	0.498867	0.495007	0.497205	0.510783	0.993301	0.972803	0.996648	0.82767	0.500624	0.502753	0.494091	0.495367	0.781271	0.693281	0.782676	0.503685	0.78414	0.785352	0.992379	0.994961	0.9956	0.995215	0.994855	0.994996	0.783708	0.995657	0.995759	0.993347	0.993579	0.995306	0.994744	0.508401	0.503431	0.498644	0.498073	0.500885
Bactoprenyl diphosphate	0.315885	0.70558	0.695174	0.706555	0.990365	0	0	0	0	0	0	0	0	0	0	0	0.723456	0.706905	0.98921	0.996834	0.996758	0.699337	0.924326	0.897359	0.996626	0.996576	0.99652	0.99653	0.996486	0.996375	0.996489	0.996314	0.996644	0.996482	0.936823	0.936006	0.935931	0.996631	0.99626	0.996484	0.996167	0.996488	0.988531	0.988039	0.977793	0.995114	0.994684	0.991609	0.995361
Thiamin diphosphate	0	0	0	0	0.502795	0	0.502721	0.495703	0	0	0	0.50245	0.505414	0	0	0	0.775728	0.508792	0.504397	0.954995	0.883642	0.783086	0.779934	0.785541	0.894549	0.907406	0.903763	0.905758	0.87172	0.907937	0.906976	0.828792	0.853914	0.847801	0.853783	0.84562	0.848405	0.829594	0.902865	0.901963	0.823318	0.831989	0.859932	0.871488	0.692306	0.69651	0.69302	0.69158	0.843205
L-Lysine	0	0.492478	0	0	0.778018	0	0	0	0	0	0	0.516864	0.50115	0	0.499726	0.697483	0.995614	0.826899	0.859453	0.925492	0.935088	0.90749	0.908321	0.923822	0.916783	0.920111	0.918322	0.918652	0.92006	0.895248	0.897071	0.920898	0.827888	0.836248	0.918415	0.918455	0.920726	0.910149	0.917398	0.919361	0.919661	0.919148	0.893665	0.900722	0.860145	0.882848	0.859142	0.85947	0.777581
L-Phenylalanine	0.489438	0.504039	0.502082	0.495687	0.496964	0.497732	0.512154	0.507709	0.497065	0.506274	0.505935	0.512008	0.502053	0.695081	0.694239	0.508676	0.995143	0.773945	0.825273	0.918625	0.864665	0.829342	0.694738	0.506291	0.500225	0.829196	0.85689	0.828365	0.855409	0.857892	0.857976	0.829156	0.828918	0.837097	0.694422	0.692465	0.695733	0.835059	0.910868	0.912758	0.988838	0.831004	0.861116	0.858124	0.78292	0.822972	0.824651	0.859497	0.824149
L-Tyrosine	0.497618	0.499226	0.513766	0.493271	0.693751	0.499476	0.493614	0.501199	0.501218	0.494863	0.505187	0.496504	0.495962	0.689993	0.693806	0.695795	0.698155	0.789585	0.783025	0.911801	0.882733	0.855552	0.831568	0.83051	0.77804	0.829935	0.828184	0.829636	0.828427	0.829282	0.827177	0.853862	0.859363	0.859426	0.861529	0.860625	0.849283	0.860528	0.910357	0.908754	0.988845	0.856254	0.832346	0.829155	0.833463	0.830433	0.825766	0.819352	0.694224
Flavin adenine dinucleotide	0	0	0	0	0.777563	0	0.772391	0.778507	0.776661	0.771165	0.771781	0.820601	0.821142	0.505876	0.304239	0	0.884867	0.780256	0.860021	0.893389	0.892596	0.831153	0.876088	0.829843	0.82803	0.884658	0.880542	0.880188	0.881002	0.881824	0.882973	0.883745	0.879138	0.87967	0.882674	0.881798	0.883214	0.830977	0.830924	0.831782	0.827896	0.827422	0.858334	0.854717	0.855424	0.493521	0.833682	0.88539	0.883193
Riboflavin	0	0.500037	0.500452	0.506803	0.687327	0.502448	0.690175	0.695232	0.699618	0.698423	0.694857	0.696867	0.697304	0	0	0	0.828005	0.692902	0.774058	0.852255	0.856087	0.693797	0.829266	0.691677	0.691052	0.829572	0.832042	0.828017	0.833397	0.833035	0.827183	0.831068	0.824943	0.828673	0.834303	0.831188	0.824195	0.694265	0.692339	0.694846	0.69069	0.697186	0.77701	0.772465	0.827765	0.498513	0.705588	0.826864	0.83533
L-Serine	0.502255	0.818932	0.778597	0.819004	0	0.7703	0.772271	0.771096	0.770306	0.769855	0.765985	0.820667	0.83442	0.497555	0.506897	0	0.99513	0.993212	0	0.996647	0.996219	0.99462	0.995422	0.994263	0.995135	0.9957	0.995265	0.99538	0.995585	0.99554	0.995886	0.99307	0.994916	0.995525	0.995169	0.994756	0.995053	0.995464	0.995551	0.99571	0.99481	0.995165	0.995289	0.994728	0.991278	0.964002	0.993794	0	0.993895
Thymidine-triphosphate	0.508017	0.863987	0.870942	0.887925	0.692659	0	0	0	0	0	0	0.915321	0.907072	0	0	0	0.995183	0.984716	0.778587	0.996043	0.995699	0.993859	0.99504	0.993331	0.995201	0.994906	0.994923	0.994783	0.995108	0.994857	0.995026	0.992528	0.99491	0.994822	0.995025	0.994491	0.99482	0.995395	0.995026	0.995417	0.994683	0.995072	0.962382	0.965906	0.830623	0.697142	0.734604	0.695442	0.699339
Guanosine-triphosphate	0.785307	0.839391	0.792714	0.860259	0.49688	0	0	0	0	0	0	0.916039	0.908736	0	0	0.860345	0.994198	0.982535	0.976513	0.995884	0.986281	0.993559	0.994703	0.981984	0.984043	0.984088	0.994685	0.994394	0.994515	0.994614	0.99492	0.99167	0.985236	0.98534	0.906408	0.917141	0.919804	0.993062	0.984563	0.984306	0.992767	0.993206	0.994569	0.994171	0.962518	0.975144	0.981894	0.989617	0.96498
Deoxyguanosine-triphosphate	0.848977	0.896331	0.864683	0.881276	0.777859	0	0	0	0	0	0	0.905574	0	0	0.494701	0.491419	0.994228	0.98286	0.976841	0.995873	0.986115	0.993529	0.994729	0.982031	0.984023	0.984185	0.994707	0.994404	0.994522	0.994581	0.994715	0.991827	0.985231	0.985252	0.935679	0.939525	0.942227	0.993136	0.984315	0.984414	0.99294	0.993299	0.962886	0.965625	0.960864	0.974492	0.981879	0.989701	0.965074
L-Threonine	0.492685	0.499358	0.503123	0.498203	0.49204	0.498364	0.503772	0.496621	0.497548	0.503053	0.503358	0.512672	0.503904	0.68852	0.504199	0.778933	0.995124	0.993194	0.974042	0.996642	0.996229	0.994617	0.995476	0.994135	0.995312	0.995717	0.995459	0.99539	0.995596	0.995502	0.995895	0.994889	0.994901	0.99555	0.995182	0.99482	0.994951	0.995464	0.995577	0.995744	0.994779	0.995153	0.995298	0.995018	0.991204	0.963992	0.993804	0.990175	0.993906
L-Leucine	0.689416	0.699956	0.695484	0.694727	0.695965	0.691941	0.701277	0.691986	0.695226	0.697067	0.700017	0.697625	0.703347	0.786086	0.696755	0.784047	0.779581	0.701124	0.69496	0.996641	0.99624	0.777195	0.995432	0.781442	0.831036	0.995698	0.995258	0.99533	0.99555	0.995559	0.995881	0.994959	0.994918	0.995577	0.931323	0.78456	0.779146	0.777899	0.99557	0.995711	0.786031	0.995191	0.995323	0.99506	0.991475	0.878806	0.993822	0.990512	0.780112
L-Cysteine	0.694383	0.699166	0.704634	0.702114	0.700826	0.700856	0.695301	0.690878	0.698648	0.693962	0.6915	0.697026	0.689474	0.694662	0.690049	0.760289	0.858821	0.832279	0.869094	0.979091	0.976633	0.942325	0.925917	0.897172	0.921508	0.960189	0.958831	0.961507	0.960225	0.965528	0.965575	0.948619	0.861413	0.856263	0.857591	0.86153	0.854261	0.946514	0.861238	0.864976	0.784374	0.951533	0.909523	0.906823	0.91846	0.798835	0.697524	0.79452	0.826714
L-Methionine	0.692619	0.697277	0.696244	0.705238	0.78229	0.694721	0.696641	0.700157	0.692554	0.693722	0.69593	0.778328	0.773424	0.722736	0.787022	0.70152	0.787696	0.77755	0.892765	0.959136	0.976391	0.881325	0.786293	0.779101	0.784007	0.918169	0.914009	0.917033	0.915639	0.904754	0.917293	0.91072	0.899722	0.893683	0.912279	0.911694	0.909655	0.945737	0.938533	0.939	0.905593	0.920923	0.882472	0.880856	0.908504	0.861907	0.847481	0.90386	0.912031
S-Adenosyl-L-methionine	0.70424	0.404984	0.40622	0.766283	0.824757	0.770972	0.776385	0.774829	0.773072	0.774612	0.767884	0.823436	0.823424	0.496467	0.270566	0.302935	0.896311	0.864989	0.895301	0.960096	0.970675	0.8823	0.871822	0.871348	0.873795	0.918141	0.913421	0.915767	0.914103	0.923202	0.918661	0.889856	0.900119	0.893951	0.913538	0.912778	0.913609	0.946388	0.934647	0.936329	0.908231	0.922024	0.882149	0.883217	0.905013	0.856326	0.851474	0.907363	0.900895
Acyl carrier protien	0	0	0	0	0.493812	0.907476	0.899016	0.897166	0.906017	0.899835	0.903899	0.895385	0.897681	0	0.905198	0.310223	0.9428	0.961056	0.963321	0.974169	0.974881	0.9734	0.974357	0.974386	0.975129	0.975315	0.974592	0.975902	0.974422	0.975625	0.974697	0.973739	0.973972	0.974165	0.9748	0.972501	0.972866	0.974422	0.973925	0.974527	0.973645	0.973583	0.959317	0.957582	0.962006	0.961762	0.961103	0.962347	0.962561
Deoxycytidine-triphosphate	0.773423	0.902508	0.76746	0.869568	0.976355	0.962336	0.942418	0.943132	0.955007	0.960087	0.959725	0.934849	0.9418	0	0.699541	0.889643	0.994264	0.982848	0.98491	0.995886	0.995385	0.993541	0.994778	0.99295	0.994697	0.99449	0.994678	0.994378	0.9945	0.994631	0.994937	0.992621	0.994333	0.99431	0.994801	0.994274	0.994652	0.99313	0.99478	0.995187	0.992858	0.99315	0.963146	0.965057	0.991305	0.992744	0.992584	0.990365	0.993204
Deoxyadenosine-triphosphate	0.854234	0.881311	0.843329	0.881667	0.95351	0.940277	0.907844	0.876344	0.904069	0.90281	0.907486	0.925618	0.931189	0	0.818082	0.504751	0.994256	0.984125	0.98313	0.995871	0.986132	0.993549	0.994781	0.982865	0.984131	0.984348	0.99499	0.994826	0.995031	0.994993	0.995036	0.99232	0.98545	0.985341	0.9948	0.994282	0.994703	0.994522	0.984227	0.984567	0.994518	0.994864	0.69471	0.704071	0.968689	0.976708	0.982742	0.990458	0.981386
L-Alanine	0.873531	0.908989	0.907101	0.908277	0.923606	0.906374	0.912744	0.910995	0.907008	0.907453	0.907315	0.903434	0.908189	0.904487	0.901766	0.91734	0.995623	0.993144	0.928331	0.996632	0.996209	0.994638	0.995436	0.944069	0.995353	0.995705	0.995285	0.995344	0.9956	0.995519	0.995886	0.937636	0.994892	0.995559	0.943324	0.940324	0.940781	0.995432	0.995591	0.995763	0.920412	0.995156	0.995318	0.995054	0.934087	0.921115	0.927681	0.990153	0.925124
Coenzyme A	0.511674	0.848658	0.502162	0.695315	0.848274	0.930633	0.933344	0.933182	0.920497	0.922461	0.923246	0.922786	0.929824	0.712276	0.914957	0.304785	0.976482	0.965001	0.973156	0.990538	0.988487	0.969702	0.978019	0.971004	0.975039	0.983024	0.984592	0.984724	0.985457	0.988836	0.986123	0.975165	0.974427	0.97581	0.971639	0.970294	0.970567	0.976702	0.976367	0.97815	0.977667	0.977106	0.97159	0.970051	0.978033	0.965437	0.942567	0.973506	0.967938
L-Aspartate	0.692616	0.860341	0.70093	0.686689	0.882484	0.858899	0.860799	0.864709	0.856696	0.85281	0.860918	0.684529	0.692005	0.846737	0.878414	0.901492	0.995132	0.99304	0.987648	0.996655	0.996221	0.994612	0.995446	0.994287	0.995157	0.9957	0.995252	0.995388	0.995591	0.995538	0.995873	0.99486	0.994887	0.995566	0.99517	0.995002	0.994903	0.995417	0.995585	0.9957	0.994752	0.99517	0.995325	0.995035	0.991214	0.993521	0.993801	0.990109	0.993913
H2O	0.944721	0.972736	0.960951	0.977161	0.991825	0.97478	0.985684	0.985941	0.974868	0.968431	0.974809	0.971195	0.97085	0.94949	0.965685	0.976652	0.997409	0.996942	0.99338	0.998155	0.998268	0.997184	0.997628	0.996676	0.997636	0.997622	0.997743	0.997859	0.998005	0.997993	0.99786	0.997611	0.997644	0.997717	0.997303	0.997509	0.997285	0.99758	0.997604	0.997661	0.997406	0.997542	0.997203	0.997528	0.994751	0.996713	0.99681	0.99481	0.996549
Glycine	0.892116	0.94016	0.934369	0.937667	0.949267	0.936835	0.943301	0.944034	0.937539	0.935161	0.934409	0.933517	0.933445	0.920753	0.937951	0.934888	0.995124	0.993066	0.976562	0.996657	0.996223	0.994627	0.995415	0.994304	0.995158	0.995705	0.995293	0.99537	0.995582	0.995537	0.995905	0.992962	0.994909	0.995555	0.995145	0.994787	0.994913	0.995429	0.995593	0.995713	0.994837	0.995178	0.995306	0.995033	0.991318	0.964011	0.993776	0.990669	0.993912
Cytidine-triphosphate	0.506986	0.880563	0.497334	0.877126	0.975989	0.961571	0.967697	0.96717	0.963868	0.954458	0.95397	0.951917	0.950481	0.749941	0.485617	0.925037	0.994219	0.983142	0.983774	0.995897	0.995389	0.993552	0.994727	0.992886	0.994715	0.994487	0.994705	0.994415	0.994525	0.994603	0.994935	0.992582	0.994496	0.994353	0.994777	0.994315	0.994584	0.993083	0.994735	0.995175	0.992772	0.993198	0.981499	0.981404	0.941285	0.992648	0.992648	0.990241	0.993155
Adenosine-triphosphate	0.698331	0.777595	0.691371	0.874958	0.953842	0.938835	0.943066	0.940294	0.939525	0.938414	0.941166	0.942928	0.921992	0.811621	0.768174	0.916685	0.99426	0.979824	0.982682	0.995869	0.985862	0.993542	0.99477	0.981955	0.98396	0.984416	0.995006	0.994841	0.995054	0.994996	0.995001	0.992181	0.985096	0.985213	0.994746	0.994197	0.994632	0.993079	0.984354	0.98451	0.993076	0.993505	0.994577	0.994154	0.968728	0.974455	0.981947	0.990203	0.980045
Uridine-triphosthate	0.69695	0.903167	0.872394	0.882048	0.97752	0.965285	0.971636	0.971404	0.965836	0.964101	0.964157	0.963443	0.96157	0.762375	0.499023	0.929611	0.995036	0.983468	0.984774	0.99601	0.99567	0.993762	0.995018	0.993167	0.995176	0.994824	0.994772	0.994754	0.995055	0.994791	0.994997	0.992774	0.994912	0.994699	0.994934	0.994493	0.994687	0.993494	0.994935	0.995345	0.993162	0.993351	0.981843	0.981719	0.99109	0.993146	0.993028	0.990662	0.993165
L-Glutamate	0.762689	0.917116	0.841731	0.91656	0.9161	0.891968	0.89661	0.894504	0.889829	0.829695	0.827842	0.862148	0.855309	0.90178	0.896962	0.911912	0.995088	0.948171	0.986529	0.996639	0.996232	0.935676	0.995467	0.9377	0.940113	0.995675	0.995286	0.995352	0.995574	0.995527	0.995908	0.995074	0.995008	0.995533	0.938454	0.941268	0.938541	0.937769	0.995665	0.995789	0.948268	0.994971	0.995321	0.995089	0.953906	0.941537	0.941275	0.946471	0.926856
L-Glutamine	0.697593	0.772134	0.691773	0.693049	0.915347	0.705086	0.693284	0.698037	0.690022	0.694088	0.695468	0.694504	0.698728	0.698442	0.693797	0.914468	0.995139	0.947794	0.986432	0.99664	0.996211	0.90982	0.995453	0.937246	0.9392	0.995691	0.995277	0.995385	0.995613	0.995559	0.995883	0.995089	0.994906	0.995569	0.940497	0.940537	0.919961	0.938176	0.995649	0.995829	0.951176	0.994982	0.99545	0.995066	0.953499	0.941082	0.941876	0.94554	0.948332
Nicotinamide adenine dinucleotide	0.493509	0.688725	0.505708	0.667677	0.906961	0.879898	0.885614	0.881663	0.882226	0.882447	0.885388	0.891332	0.889207	0.489879	0.503962	0.696435	0.931262	0.932483	0.922291	0.995864	0.985952	0.99354	0.932925	0.931464	0.931292	0.93232	0.932797	0.933437	0.932945	0.932611	0.930406	0.99185	0.928504	0.917508	0.925403	0.925753	0.928782	0.933302	0.984244	0.984974	0.895815	0.933905	0.929132	0.924729	0.921029	0.827808	0.930788	0.93318	0.922632
Nicotinamide adenine dinucleotide phosphate	0.496807	0.505117	0.496278	0.497942	0.890831	0.49667	0.500652	0.504084	0.501309	0.508145	0.499973	0.879096	0.887755	0.505378	0.498171	0.494548	0.929287	0.915752	0.924437	0.995889	0.986097	0.993586	0.933056	0.931088	0.93084	0.931186	0.933892	0.932429	0.933848	0.933055	0.930913	0.991837	0.933224	0.929634	0.925343	0.929088	0.928722	0.933848	0.984119	0.984498	0.933983	0.935202	0.929608	0.926084	0.924537	0.827775	0.930864	0.93409	0.924718
10-Formyltetrahydrofolate	0	0.800597	0.754442	0.792507	0.798096	0.744141	0.744826	0.750897	0.749088	0.745311	0.74598	0.833785	0.825429	0	0	0	0.914239	0.902467	0.879699	0.949092	0.950011	0.902902	0.911106	0.906613	0.910459	0.950764	0.945164	0.945178	0.945908	0.95175	0.950907	0.929007	0.94504	0.952157	0.914291	0.917182	0.9175	0.899311	0.925219	0.927719	0.917564	0.927957	0.926493	0.919793	0.9123	0.915894	0.854749	0.898391	0.916879
Tetrahydrofolate	0.710143	0.892547	0.866855	0.873687	0.686624	0.831304	0.832484	0.833789	0.831713	0.819711	0.819013	0.876278	0.876448	0.779148	0	0.505696	0.912396	0.906259	0.881131	0.948866	0.948867	0.883901	0.9116	0.886539	0.913638	0.948263	0.947794	0.945045	0.94397	0.951531	0.94941	0.922549	0.944891	0.947496	0.915942	0.917384	0.915873	0.918991	0.928178	0.926151	0.915728	0.927457	0.926211	0.921621	0.899428	0.892167	0.855081	0.91242	0.916761
Co2+	0	0	0	0	0	0	0	0	0	0	0	0	0	0	0	0	0.926344	0	0.926534	0	0	0	0	0	0	0	0	0	0	0	0	0	0	0	0	0	0	0.934033	0.881632	0.933005	0	0	0	0	0.926035	0	0	0.494405	0.897019
Cobamamide	0	0	0	0	0	0	0	0	0	0	0	0	0	0	0	0.4417	0.722716	0	0.72815	0	0	0	0	0	0	0	0	0	0	0	0	0.305407	0	0	0	0	0	0.485463	0.638193	0.639351	0	0.405492	0.724866	0.727637	0.301005	0	0	0.494619	0.492715
Stearoyllipoteichoic acid n=24 linked D-alanine substituted	0	0	0	0	0	0	0	0	0	0	0	0	0	0	0	0	0	0	0	0.971822	0.781731	0.785171	0.781189	0.692819	0.78619	0.825798	0.964377	0.881119	0.777498	0.780764	0.785525	0.81246	0.826511	0.790668	0.818826	0.773539	0.82011	0.830577	0.786742	0.828119	0.759823	0.781284	0.694525	0.686981	0	0	0	0	0
Isoheptadecanoyllipoteichoic acid n=24 linked D-alanine substituted	0	0	0	0	0	0	0	0	0	0	0	0	0	0	0	0	0	0	0	0.941365	0.785298	0.785796	0.776112	0.69082	0.783818	0.828261	0.938059	0.882647	0.784354	0.778531	0.787149	0.814068	0.829491	0.779766	0.822446	0.77973	0.815584	0.832593	0.780645	0.828694	0.756422	0.781824	0.701093	0.701311	0	0	0	0	0
Anteisoheptadecanoyllipoteichoic acid n=24 linked D-alanine substituted	0	0	0	0	0	0	0	0	0	0	0	0	0	0	0	0	0	0	0	0.942885	0.783082	0.781769	0.776984	0.690818	0.781583	0.821494	0.941889	0.883719	0.78183	0.782915	0.783707	0.811065	0.826399	0.783062	0.817184	0.771831	0.814631	0.830142	0.780389	0.833842	0.767847	0.777577	0.698381	0.698165	0	0	0	0	0
Glycerol teichoic acid n=45 linked D-ala substituted	0	0.466152	0.463836	0.471301	0	0	0	0	0	0	0	0	0	0.456917	0	0	0.461453	0.474702	0.474671	0.829372	0.782515	0.759844	0.822432	0.708696	0.826684	0.822302	0.833337	0.831398	0.82823	0.827781	0.828987	0.813452	0.794295	0.785835	0.817269	0.816727	0.818838	0.83199	0.832027	0.832186	0.803596	0.834496	0.715747	0.709085	0.474217	0.472639	0.46749	0.469791	0.472242
Glycerol teichoic acid n=45 linked unsubstituted	0	0.696357	0.694873	0.687404	0	0	0	0	0	0	0	0	0	0.457314	0	0	0.78129	0.72462	0.712063	0.834177	0.709717	0.695963	0.817603	0.472618	0.823554	0.823438	0.831366	0.827586	0.829505	0.826161	0.828447	0.820575	0.745937	0.739126	0.823384	0.826776	0.827768	0.829662	0.825804	0.825616	0.829133	0.827907	0.474941	0.463471	0.470664	0.466469	0.477965	0.4767	0.472576
Glycerol teichoic acid n=45 linked glucose substituted	0	0.700513	0.68906	0.692833	0	0	0	0	0	0	0	0	0	0.45792	0	0	0.458296	0.709903	0.707257	0.830015	0.712543	0.695923	0.47419	0.469319	0.476816	0.824626	0.829457	0.833096	0.827168	0.81901	0.826303	0.82322	0.747226	0.741611	0.825111	0.82044	0.822194	0.825419	0.824164	0.824585	0.471845	0.472452	0.47706	0.479237	0.472614	0.475206	0.473219	0.474954	0.47743
Stearoyllipoteichoic acid n=24 linked glucose substituted	0	0.502469	0.501264	0.500972	0	0	0	0	0	0	0	0	0	0	0	0	0	0.768195	0.695956	0.970199	0.692329	0.692896	0	0	0	0.778173	0.963284	0.85776	0.687911	0.693409	0.695363	0.781696	0.787074	0.693662	0.779558	0.698257	0.780135	0.785864	0.696378	0.781099	0	0	0	0	0	0	0	0	0
Isoheptadecanoyllipoteichoic acid n=24 linked glucose substituted	0	0.507224	0.490127	0.500079	0	0	0	0	0	0	0	0	0	0	0	0	0	0.771104	0.691891	0.937123	0.695977	0.696483	0	0	0	0.774046	0.936056	0.862864	0.694245	0.694787	0.692987	0.782606	0.781773	0.689837	0.781254	0.703155	0.783857	0.787136	0.689879	0.780627	0	0	0	0	0	0	0	0	0
Anteisoheptadecanoyllipoteichoic acid n=24 linked glucose substituted	0	0.501079	0.500687	0.501504	0	0	0	0	0	0	0	0	0	0	0	0	0	0.772391	0.698994	0.918948	0.698394	0.690942	0	0	0	0.772431	0.93645	0.864491	0.692792	0.69552	0.690445	0.778638	0.783473	0.693369	0.782035	0.689843	0.784564	0.782271	0.685031	0.78602	0	0	0	0	0	0	0	0	0
Siroheme	0	0	0	0	0	0	0	0	0	0	0	0	0	0	0	0	0	0	0	0.472324	0	0	0	0	0	0	0.477008	0.471215	0.475832	0.482744	0.475062	0	0	0	0	0	0	0	0	0	0	0	0.453067	0.448227	0	0	0	0	0.680734
Acetylgalactosamine glucose phosphate	0	0	0	0	0	0	0	0	0	0	0	0	0	0	0	0	0	0	0	0	0	0	0	0	0	0.504346	0	0	0	0	0	0	0	0	0	0	0	0	0	0.995195	0	0	0	0	0	0	0	0	0
Core oligosaccharide lipid A	0	0	0	0	0	0	0	0	0	0	0	0	0	0	0	0	0	0	0	0.302622	0	0	0	0	0	0	0	0	0	0	0	0	0	0	0	0	0	0	0	0	0	0	0	0	0	0	0	0	0
Mg2+	0	0	0	0	0	0	0	0	0	0	0	0	0	0	0	0	0	0	0	0	0	0	0	0	0	0	0	0	0	0	0	0	0	0	0	0	0	0	0	0	0	0	0	0	0	0	0	0	0
Zn2+	0	0	0	0	0	0	0	0	0	0	0	0	0	0	0	0	0	0	0	0	0	0	0	0	0	0	0	0	0	0	0	0	0	0	0	0	0	0	0	0	0	0	0	0	0	0	0	0	0
Mn2+	0	0	0	0	0	0	0	0	0	0	0	0	0	0	0	0	0	0	0	0	0	0	0	0	0	0	0	0	0	0	0	0	0	0	0	0	0	0	0	0	0	0	0	0	0	0	0	0	0
Cu2+	0	0	0	0	0	0	0	0	0	0	0	0	0	0	0	0	0	0	0	0	0	0	0	0	0	0	0	0	0	0	0	0	0	0	0	0	0	0	0	0	0	0	0	0	0	0	0	0	0
K+	0	0	0	0	0	0	0	0	0	0	0	0	0	0	0	0	0	0	0	0	0	0	0	0	0	0	0	0	0	0	0	0	0	0	0	0	0	0	0	0	0	0	0	0	0	0	0	0	0
Ca2+	0	0	0	0	0	0	0	0	0	0	0	0	0	0	0	0	0	0	0	0	0	0	0	0	0	0	0	0	0	0	0	0	0	0	0	0	0	0	0	0	0	0	0	0	0	0	0	0	0
Phosphatidylethanolamine dioctadecanoyl	0	0	0	0	0	0	0	0	0	0	0	0	0	0	0	0	0.911104	0.967062	0.689103	0.972789	0.969125	0	0	0	0	0	0	0	0	0	0	0	0	0	0	0	0	0	0	0	0	0	0	0	0	0	0	0	0
Diisoheptadecanoylphosphatidylethanolamine	0	0	0	0	0	0	0	0	0	0	0	0	0	0	0	0	0.899637	0.910121	0.694952	0.945331	0.916912	0	0	0	0	0	0	0	0	0	0	0	0	0	0	0	0	0	0	0	0	0	0	0	0	0	0	0	0
Dianteisoheptadecanoylphosphatidylethanolamine	0	0	0	0	0	0	0	0	0	0	0	0	0	0	0	0	0.89685	0.912638	0.684619	0.946717	0.917632	0	0	0	0	0	0	0	0	0	0	0	0	0	0	0	0	0	0	0	0	0	0	0	0	0	0	0	0
L-Tryptophan	0	0	0	0	0	0	0	0	0	0	0	0	0	0	0.53817	0	0	0	0.414443	0.918232	0.918157	0.908714	0	0	0	0.919338	0.916953	0.917483	0.917927	0.917951	0.922466	0.989589	0.919943	0.919983	0.909508	0.906838	0.90984	0.988991	0.919192	0.919937	0.988642	0.700437	0.780339	0.779626	0.695625	0.883567	0.69495	0.498811	0.775025
5-Methyltetrahydrofolate	0	0	0	0	0	0	0	0	0	0	0	0	0	0.689303	0.502855	0	0	0	0.882991	0.94959	0.949075	0	0	0	0	0.950572	0.946384	0.944101	0.94661	0.950826	0.95026	0.927249	0.944636	0.946839	0.913278	0.91816	0.918512	0.918265	0.910383	0.927522	0.91632	0.929034	0.926788	0.921654	0.911129	0.912909	0	0.9128	0.916627
Glutathione	0	0.248067	0.217152	0.242065	0.213289	0	0	0	0	0	0	0	0	0.49667	0.498975	0.562316	0.785295	0.446967	0.8678	0.979267	0.784043	0.933369	0.949401	0.925418	0.925052	0.778904	0.77404	0.780565	0.780972	0.965062	0.965517	0.49393	0.772609	0.783619	0.89212	0.891743	0.887896	0.505595	0.91831	0.919344	0.499455	0.49609	0.721378	0.593453	0.885134	0.679771	0.581981	0.652862	0.593054
Stearoylcardiolipin	0	0	0	0	0	0	0	0	0	0	0	0	0	0	0	0	0.913151	0.966782	0.917648	0.500566	0.968989	0.503318	0.505143	0.489753	0.504533	0.501428	0.507156	0.49428	0.498174	0.492013	0.495358	0.506703	0.492785	0.511591	0.496383	0.498509	0.498268	0.500245	0.509051	0.505046	0.916868	0.498958	0.502092	0.505179	0.506735	0.496409	0.499385	0.507631	0.49747
Isoheptadecanoylcardiolipin	0	0	0	0	0	0	0	0	0	0	0	0	0	0	0	0	0.897977	0.912434	0.910308	0.508103	0.916464	0.503084	0.506644	0.502107	0.502786	0.493372	0.505256	0.503886	0.496406	0.496694	0.504719	0.494476	0.499552	0.508014	0.506948	0.49753	0.496414	0.502646	0.495668	0.50092	0.909555	0.505354	0.507458	0.501739	0.502732	0.507575	0.495406	0.491785	0.489912
Anteisoheptadecanoylcardiolipin	0	0	0	0	0	0	0	0	0	0	0	0	0	0	0	0	0.893881	0.875571	0.913244	0.495598	0.89602	0.506622	0.489414	0.497763	0.504125	0.49344	0.499325	0.493789	0.500165	0.505241	0.505813	0.503077	0.496872	0.502739	0.504678	0.501424	0.495451	0.501124	0.50599	0.499532	0.907741	0.490402	0.49909	0.508119	0.497533	0.49752	0.500486	0.504546	0.506149
Phosphatidylglycerol dioctadecanoyl	0	0	0	0	0	0	0	0	0	0	0	0	0	0.690582	0	0	0.911206	0.966492	0.92179	0.490314	0.968501	0.489662	0.500619	0.50091	0.507002	0.500781	0.491931	0.496455	0.498453	0.506689	0.492563	0.493839	0.497909	0.504053	0.504843	0.503861	0.498837	0.493448	0.503599	0.500084	0.915863	0.504685	0.498833	0.505183	0.510761	0.500576	0.505001	0.506268	0.497013
Diisoheptadecanoylphosphatidylglycerol	0	0	0	0	0	0	0	0	0	0	0	0	0	0.703809	0	0	0.897024	0.911531	0.907133	0.500258	0.916173	0.49968	0.494463	0.502407	0.495608	0.498616	0.504259	0.493804	0.497563	0.499717	0.493332	0.506556	0.495511	0.508457	0.508142	0.493316	0.502347	0.496125	0.497782	0.49893	0.909399	0.498736	0.507012	0.498935	0.501372	0.505343	0.492759	0.495304	0.501699
Dianteisoheptadecanoylphosphatidylglycerol	0	0	0	0	0	0	0	0	0	0	0	0	0	0.699072	0	0	0.894098	0.91178	0.912145	0.498028	0.918245	0.499262	0.508572	0.504059	0.492295	0.501394	0.495854	0.504074	0.503898	0.504093	0.500943	0.512226	0.500102	0.500788	0.492169	0.495101	0.503831	0.507085	0.490595	0.501494	0.910413	0.492074	0.497941	0.503343	0.501847	0.492623	0.498466	0.494972	0.503505
Spermidine	0	0	0.442755	0	0	0	0	0	0	0	0	0	0	0	0	0	0.829372	0	0.501225	0.996664	0.996232	0	0.497445	0	0	0.490377	0.495808	0.504565	0.499284	0.492662	0.512827	0.503304	0.497038	0.497112	0.503599	0.502397	0.505045	0	0.503244	0.503434	0.501534	0.508356	0.506863	0.491673	0	0	0	0.493077	0
Cl-	0	0.497613	0.50896	0	0.499417	0	0	0	0	0	0	0	0	0	0.50284	0.499311	0.495621	0	0	0.494037	0.501821	0.506815	0.502054	0.498641	0.491775	0.491889	0.490916	0.507656	0.501713	0.51661	0.500657	0	0.502803	0.502317	0	0	0	0	0.508181	0.499202	0	0	0.504145	0.505977	0	0.493459	0	0	0
Heme	0	0	0	0	0	0	0	0	0	0	0	0	0	0	0	0	0	0	0	0.828985	0.776207	0	0	0	0.403864	0.785507	0.831451	0.835864	0.835993	0.825715	0.832741	0.403515	0.400195	0.405138	0.405413	0.401102	0.401006	0.4111	0.782811	0.779668	0.396837	0.409363	0.781788	0.783688	0	0	0	0	0
Isoheptadecanoyllipoteichoic acid n=24 linked N-acetyl-D-glucosamine	0	0	0	0	0	0	0	0	0	0	0	0	0	0	0	0	0.699053	0.784076	0.692751	0.937744	0.687927	0.689604	0.686908	0.496403	0.694089	0.777086	0.932764	0.861281	0.693196	0.69521	0.69514	0.783912	0.780647	0.691433	0.783465	0.696118	0.780253	0.782834	0.687351	0.784472	0.685197	0.692014	0.500378	0.507092	0.509469	0	0	0	0
Stearoyllipoteichoic acid n=24 linked N-acetyl-D-glucosamine	0	0	0	0	0	0	0	0	0	0	0	0	0	0	0	0	0.697427	0.78213	0.686426	0.970937	0.686044	0.705985	0.698923	0.493171	0.703245	0.784932	0.963447	0.858095	0.691794	0.690648	0.696589	0.781492	0.785806	0.700508	0.781097	0.692516	0.783041	0.773984	0.700499	0.777439	0.699178	0.693185	0.498684	0.504764	0.498976	0	0	0	0
Anteisoheptadecanoyllipoteichoic acid n=24 linked N-acetyl-D-glucosamine	0	0	0	0	0	0	0	0	0	0	0	0	0	0	0	0	0.694575	0.776232	0.690928	0.938249	0.692212	0.696079	0.691267	0.507003	0.69483	0.778018	0.938639	0.85535	0.688202	0.70118	0.6951	0.778664	0.779888	0.695914	0.778967	0.68828	0.785216	0.778802	0.693912	0.785108	0.698105	0.697906	0.501679	0.498044	0.503062	0	0	0	0
Isoheptadecanoyllipoteichoic acid n=24 linked unsubstituted	0	0.499871	0.502797	0.514382	0	0	0	0	0	0	0	0	0	0	0	0	0.693952	0.782154	0.698915	0.925591	0.693156	0.703572	0.687233	0.497144	0.698512	0.779413	0.934061	0.862573	0.693832	0.699607	0.693541	0.784422	0.785842	0.695002	0.782508	0.698317	0.787125	0.783702	0.687433	0.785728	0.683793	0.694589	0.504972	0.504382	0.495095	0	0	0	0
Stearoyllipoteichoic acid n=24 linked unsubstituted	0	0.502477	0.501764	0.500239	0	0	0	0	0	0	0	0	0	0	0	0	0.695902	0.774527	0.691441	0.970341	0.69988	0.695354	0.694408	0.507541	0.700044	0.78125	0.963997	0.858053	0.6908	0.698836	0.691838	0.786585	0.787905	0.697567	0.781426	0.695496	0.785831	0.778061	0.696126	0.77845	0.691405	0.697546	0.496323	0.503173	0.496655	0	0	0	0
Anteisoheptadecanoyllipoteichoic acid n=24 linked unsubstituted	0	0.507441	0.501147	0.502328	0	0	0	0	0	0	0	0	0	0	0	0	0.696855	0.777487	0.698314	0.93856	0.696859	0.69144	0.694859	0.492462	0.689871	0.774019	0.936882	0.85986	0.69214	0.698161	0.694543	0.776715	0.781079	0.693753	0.776821	0.691891	0.779396	0.779842	0.686949	0.788971	0.689292	0.69003	0.496004	0.49991	0.500175	0	0	0	0
Fe3+	0	0	0	0	0.505406	0	0	0	0	0	0	0	0	0	0	0.499723	0	0	0.497237	0.829	0.782458	0.493739	0.499133	0.507344	0.697773	0.779363	0.827535	0.837491	0.830296	0.824682	0.830454	0.693865	0.697941	0.699815	0.697149	0.693977	0.688486	0.690036	0.783474	0.784481	0.699226	0.691132	0.787347	0.781682	0.511715	0	0.498295	0.501773	0.703534
Fe2+	0	0	0	0	0.494463	0	0	0	0	0	0	0	0	0	0	0.507321	0	0	0.498171	0.827921	0.782263	0.504517	0.501156	0.502561	0.692134	0.789113	0.828706	0.836845	0.830398	0.819943	0.828684	0.692082	0.700698	0.682348	0.700339	0.700174	0.701522	0.696927	0.78105	0.787636	0.699391	0.695342	0.78732	0.783606	0.509264	0	0.503716	0.500918	0.695431
Peptidoglycan polymer	0.315885	0.685846	0.677894	0.686027	0.437879	0	0	0	0	0	0	0	0	0	0	0	0.729417	0.709256	0.722996	0.731045	0.725527	0.702599	0.706602	0.705907	0.695478	0.689073	0.703479	0.699892	0.701451	0.695402	0.692498	0.698828	0.701775	0.706351	0.728936	0.722891	0.728288	0.707669	0.725233	0.724208	0.70536	0.70676	0.728357	0.725429	0.7186	0.723968	0.698491	0.7249	0.71321
Menaquinone-8	0	0	0	0	0	0	0	0	0	0	0	0	0	0	0.505191	0	0.774528	0.504547	0.50547	0.49849	0.78301	0.500303	0.75709	0.495595	0.502991	0.774936	0.496946	0.503668	0.503487	0.500988	0.771072	0.770021	0.770782	0.767881	0.768298	0.501665	0.503141	0.778582	0.780509	0.783477	0.776971	0.768222	0.78862	0.7806	0	0.502696	0.505057	0.502349	0.50601
Ubiquinone-8	0	0	0	0	0	0	0.499823	0	0	0	0	0.502072	0.496494	0.506683	0.501689	0.503949	0.494614	0.398417	0.494531	0.500169	0.506477	0.511233	0.507982	0.498625	0.502071	0.507332	0.500038	0.504884	0.499109	0.496434	0.504432	0.497383	0.494761	0.498575	0.511597	0.499747	0.500833	0.502243	0.502082	0.495822	0.502705	0.500665	0.495543	0.512057	0.497636	0.497311	0.492139	0.493493	0.492117
2-Demethylmenaquinone-8	0	0	0	0	0	0	0.510317	0	0	0	0	0.501684	0.507997	0	0	0	0.504145	0	0.498221	0.492114	0.492951	0.58721	0.494081	0.588406	0.502299	0.491214	0.501808	0.502951	0.497294	0.499541	0.487091	0.50306	0.496906	0.491115	0.495974	0.498974	0.494415	0.492461	0.495319	0.508386	0.507514	0.497072	0.495882	0.499907	0	0.506344	0.502731	0.498328	0.498242
Acetate	0.996711	0.997719	0.997433	0.996056	0.995979	0.995868	0.996455	0.996087	0.996378	0.995327	0.997233	0.995686	0.9961	0.995945	0.995679	0.99697	0.996683	0.99579	0.995526	0.996304	0.996091	0.99616	0.996005	0.995327	0.995716	0.996459	0.995199	0.995325	0.994539	0.996563	0.995795	0.99748	0.996798	0.996951	0.997455	0.996803	0.997053	0.998215	0.996317	0.995233	0.993906	0.995824	0.993648	0.995487	0.995374	0.994413	0.995029	0.995425	0.993328
L-Lactate	0.996537	0.997725	0.997581	0.996034	0.996282	0.99614	0.996056	0.996151	0.996343	0.995269	0.997142	0.995662	0.996032	0.996437	0.995789	0.996517	0.996282	0.995611	0.995402	0.995863	0.995533	0.995892	0.995986	0.995164	0.995779	0.996205	0.995038	0.995937	0.994197	0.996657	0.995913	0.997453	0.996779	0.996945	0.997423	0.996544	0.996986	0.998145	0.995797	0.99504	0.993682	0.995601	0.99289	0.995018	0.995051	0.994186	0.995138	0.995353	0.99319
D-Lactate	0.508105	0.997653	0.997439	0.497181	0.484236	0.50444	0.497056	0.509909	0.498813	0.496739	0.510473	0.499204	0.493928	0.500631	0.49971	0.492789	0.504426	0.485842	0.500474	0.502053	0.490366	0.497104	0.491807	0.506521	0.506726	0.689015	0.492014	0.496492	0.50081	0.506091	0.507728	0.705019	0.996695	0.99665	0.997276	0.996576	0.997185	0.998156	0.501725	0	0	0.702656	0.496469	0.699078	0.503456	0.994238	0.994766	0.99557	0.993561
Butyrate	0	0	0.997325	0	0	0	0	0	0	0	0.779641	0	0	0	0	0	0	0	0	0	0	0	0	0	0	0	0.49802	0	0	0	0	0	0.688271	0.69311	0	0	0	0	0.843996	0	0	0	0	0.995477	0	0	0	0	0
Isobutyrate	0	0	0	0	0	0	0	0	0	0	0	0	0	0	0	0	0	0	0	0	0	0	0	0	0	0	0	0	0	0	0	0	0	0	0	0	0	0	0	0	0	0	0	0	0	0	0	0	0
Succinate	0.961712	0.997658	0.997539	0.996038	0.996192	0.995998	0.99631	0.996151	0.996433	0.995093	0.997342	0.995957	0.996143	0.996338	0.995511	0.996627	0.996471	0.995674	0.995411	0.996012	0.996074	0.995972	0.995975	0.995458	0.995917	0.996524	0.995118	0.996109	0.994037	0.996544	0.99616	0.997406	0.996596	0.99668	0.997319	0.996575	0.99694	0.997985	0.771359	0.995489	0.987668	0.992476	0	0.991989	0.994976	0	0.527783	0.526871	0.646447
Formate	0.996645	0.997629	0.997417	0.996235	0.996269	0.996164	0.996246	0.996359	0.996296	0.995382	0.997158	0.996389	0.996435	0.996451	0.996013	0.996779	0.99631	0.995754	0.995671	0.996239	0.996084	0.996238	0.996018	0.995381	0.996141	0.996551	0.995285	0.996232	0.994984	0.996482	0.996209	0.997542	0.996514	0.99683	0.997432	0.996814	0.996874	0.998119	0.995927	0.995162	0.994153	0.995712	0.99378	0.995242	0.995059	0.99392	0.995061	0.995331	0.993478
Propionate	0.99685	0.997671	0.955231	0.99613	0.996229	0.996002	0.996357	0.996099	0.996473	0.995526	0.997258	0.996228	0.996281	0.996425	0.995681	0.996616	0.996585	0.995747	0.995828	0.996263	0.99603	0.995977	0.995981	0.995347	0.996306	0.996674	0.995357	0.996339	0.960434	0.996507	0.996181	0.997502	0.99661	0.996974	0.997384	0.99678	0.996895	0.998116	0.917158	0.995474	0.988968	0.921477	0.993223	0.995397	0.881383	0.829313	0.994473	0.994866	0.861857
Isovaleric acid	0	0	0	0	0	0	0	0	0	0	0	0	0	0	0	0	0	0	0	0	0	0	0	0	0	0	0	0	0	0	0	0	0	0	0	0	0	0	0	0	0	0	0	0	0	0	0	0	0
[truncated: 407 more columns]
