# Supplementary material for: Metabolic network percolation quantifies biosynthetic capabilities across the human oral microbiome
Source: eLife. 2019 Jun 13;8:e39733. doi: 10.7554/eLife.39733 (PMC6609349; doi:10.7554/eLife.39733)
Supplement: Supplementary file 7. — Correlation data from the analysis presented in Results section ‘Metabolic similarity correlates with microbial co-occurrence in the human oral microbiome’ is provided. Correlations between inter-organism metabolic metrics and microbial co-occurrences from Friedman and Alm (2012) were calculated using a Mantel test with 10,000 permutations. [file elife-39733-supp7.xlsx]

## Sheet: Sheet1
	Buccal Mucosa (18 genera)		Hard Palate (20 genera)		Keratinized gingiva (13 genera)		Saliva (24 genera)		Subgingival plaque (22 genera)		Supragingival plaque (19 genera)		Tongue dorsum (19 genera)
SparCC Co-occurrence	rho (spearman)	p-value (Mantel permutation test, 10,000 permutations)	rho (spearman)	p-value (Mantel permutation test, 10,000 permutations)	rho (spearman)	p-value (Mantel permutation test, 10,000 permutations)	rho (spearman)	p-value (Mantel permutation test, 10,000 permutations)	rho (spearman)	p-value (Mantel permutation test, 10,000 permutations)	rho (spearman)	p-value (Mantel permutation test, 10,000 permutations)	rho (spearman)	p-value (Mantel permutation test, 10,000 permutations)	Average rho	Standard Deviation rho	Average p-value	Standard Deviation p-value
PM distance w/ Co-occurrence	-0.17027	0.00209979	-0.169598	0.00119988	-0.214685	0.00769923	-0.1836	9.999e-05	-0.217935	9.999e-05	-0.245271	9.999e-05	-0.163733	0.00549945	-0.195013	0.0311047	0.00239976	0.0030301
PM complementarity w/ Co-occurrence	-0.0589037	0.206879	-0.0639152	0.134487	-0.108938	0.142486	-0.0718818	0.0344966	-0.0708449	0.0450955	-0.067396	0.0525947	-0.0831834	0.0788921	-0.075009	0.0167607	0.0992758	0.063786
Seed distance w/ Co-occurrence	0.00455713	0.930507	-0.026307	0.565843	-0.125744	0.114689	-0.114781	0.00769923	-0.10128	0.0273973	-0.0746778	0.138186	-0.0468152	0.334267	-0.0692925	0.0485024	0.302655	0.339021
Seed competition w/ Co-occurrence	0.00434243	0.933807	-0.0086766	0.850215	-0.101183	0.188781	-0.0884784	0.0243976	-0.0970321	0.0238976	-0.0625016	0.175382	-0.0313677	0.509849	-0.0549852	0.0434021	0.386618	0.382111
Seed complementarity w/ Co-occurrence	-0.0236328	0.632837	-0.0697743	0.116988	-0.0535252	0.477652	-0.0502903	0.171483	-0.0953707	0.0159984	-0.0418776	0.30377	-0.0373465	0.431557	-0.0531168	0.0235066	0.307184	0.219836
Reaction distance w/ Co-occurrence	-0.0670433	0.228177	-0.102165	0.0430957	-0.241347	0.00249975	-0.147604	0.00119988	-0.201254	0.00029997	-0.227409	9.999e-05	-0.11219	0.0386961	-0.157002	0.0673617	0.0448669	0.083002
Reaction Jaccard w/ Co-occurrence	-0.0699602	0.206279	-0.0777633	0.112989	-0.200066	0.0119988	-0.134818	0.00219978	-0.183712	0.00029997	-0.181771	0.00129987	-0.077292	0.139786	-0.132197	0.0571189	0.0678361	0.0844553
PM distance w/ Co-occurrence (Partial PM complementarity)	-0.160111	0.00349965	-0.157876	0.00239976	-0.186119	0.0225977	-0.170122	0.00029997	-0.206823	9.999e-05	-0.237137	0.00029997	-0.145147	0.0089991	-0.180476	0.0321905	0.0054566	0.00817941
PM distance w/ Co-occurrence (Partial Seed distance)	-0.170245	0.00149985	-0.168661	0.00229977	-0.21518	0.00709929	-0.176853	0.00019998	-0.215203	9.999e-05	-0.246637	9.999e-05	-0.162509	0.00539946	-0.193613	0.032041	0.00238548	0.00280829
PM distance w/ Co-occurrence (Partial Seed competition)	-0.170329	0.00329967	-0.169486	0.00169983	-0.211171	0.00929907	-0.179285	9.999e-05	-0.216503	9.999e-05	-0.245921	9.999e-05	-0.163756	0.00529947	-0.193779	0.0310623	0.00284257	0.00345935
PM distance w/ Co-occurrence (Partial Seed complementarity)	-0.171426	0.00179982	-0.167229	0.00129987	-0.214093	0.00649935	-0.181237	0.00019998	-0.219845	9.999e-05	-0.247951	9.999e-05	-0.161441	0.00489951	-0.194746	0.0327307	0.00212836	0.00256666
PM distance w/ Co-occurrence (Partial Reaction distance)	-0.160258	0.00369963	-0.150136	0.00339966	-0.151171	0.0563944	-0.147681	0.00059994	-0.162838	0.00079992	-0.188345	0.00089991	-0.142748	0.00939906	-0.157597	0.015252	0.0107418	0.0203634
PM distance w/ Co-occurrence (Partial Reaction Jaccard)	-0.157077	0.00379962	-0.153511	0.00419958	-0.169297	0.0355964	-0.145618	0.00119988	-0.157077	0.00119988	-0.188572	0.00079992	-0.149113	0.00749925	-0.160038	0.0146479	0.00775637	0.0125021
PM complementarity w/ Co-occurrence (Partial PM distance)	-0.00498403	0.923308	-0.0122028	0.779822	0.00270516	0.971403	-0.0160751	0.646035	-0.00943223	0.811119	0.0196543	0.59714	-0.0325757	0.50225	-0.00755864	0.0162069	0.747297	0.172812
Seed distance w/ Co-occurrence (Partial PM distance)	-0.0034642	0.951505	-0.0191298	0.672333	-0.126613	0.114489	-0.103397	0.0152985	-0.0950165	0.0388961	-0.0792967	0.122688	-0.0422181	0.389361	-0.0670194	0.0461106	0.329224	0.360597
Seed competition w/ Co-occurrence (Partial PM distance)	-0.00628237	0.912609	-0.00599612	0.90101	-0.0931952	0.240576	-0.0788706	0.0470953	-0.09364	0.0331967	-0.0651551	0.161784	-0.0314914	0.518548	-0.0535187	0.0385939	0.402117	0.380581
Seed complementarity w/ Co-occurrence (Partial PM distance)	-0.0310622	0.559244	-0.0636448	0.170983	-0.0509847	0.523548	-0.0404838	0.273573	-0.0998271	0.0176982	-0.0561969	0.182982	-0.0251021	0.608139	-0.0524717	0.0249487	0.333738	0.22909
Reaction distance w/ Co-occurrence (Partial PM distance)	-0.0331927	0.552045	-0.0640129	0.193281	-0.187903	0.020098	-0.0986952	0.020098	-0.139175	0.00709929	-0.163735	0.00519948	-0.077853	0.135086	-0.109224	0.0562416	0.133272	0.19871
Reaction Jaccard w/ Co-occurrence (Partial PM distance)	-0.0216402	0.69903	-0.0269768	0.570643	-0.149958	0.0560944	-0.0739617	0.0731927	-0.102949	0.0282972	-0.0879365	0.0845915	-0.0360879	0.474353	-0.0713585	0.0468029	0.283743	0.286408
Pearson Co-occurrence
PM distance w/ Co-occurrence	-0.0164284	0.844216	-0.0991232	0.113089	-0.184465	0.0334967	-0.143639	0.00139986	-0.230354	0.00019998	-0.13248	0.0411959	-0.133765	0.0213979	-0.134322	0.0670382	0.150714	0.308157
PM complementarity w/ Co-occurrence	0.0377058	0.745425	-0.0215942	0.80212	-0.0560235	0.619938	-0.0490168	0.285671	-0.0327711	0.554745	0.0232317	0.79752	-0.0437237	0.50225	-0.0203131	0.036666	0.615381	0.187155
Seed distance w/ Co-occurrence	-0.0897867	0.180682	-0.0400556	0.491751	-0.104291	0.20028	-0.0626049	0.146485	-0.0575764	0.224178	-0.0803263	0.170883	-0.0553727	0.314769	-0.0700019	0.022337	0.247004	0.120758
Seed competition w/ Co-occurrence	-0.0745834	0.39576	-0.0235153	0.745225	-0.0887396	0.369463	-0.0441329	0.316568	-0.0424012	0.39746	-0.0525552	0.452855	-0.0416311	0.475452	-0.0525084	0.0221029	0.450398	0.140122
Seed complementarity w/ Co-occurrence	-0.102923	0.311669	-0.063926	0.424158	0.0044165	0.967503	-0.0123653	0.780222	-0.00496352	0.922208	0.0312763	0.706729	-0.0253548	0.677332	-0.0248343	0.0450567	0.68426	0.242585
Reaction distance w/ Co-occurrence	-0.0928861	0.134087	-0.0850677	0.130987	-0.0696777	0.39696	-0.102042	0.0210979	-0.169919	0.00159984	-0.205622	0.00159984	-0.126917	0.0276972	-0.121733	0.0494302	0.102004	0.142067
Reaction Jaccard w/ Co-occurrence	-0.0902322	0.179482	-0.0646935	0.275672	-0.103291	0.240776	-0.00804371	0.848715	-0.119724	0.0156984	-0.0590477	0.358164	-0.0780409	0.162984	-0.0747247	0.0362518	0.297356	0.265408
PM distance w/ Co-occurrence (Partial PM complementarity)	-0.0300265	0.70253	-0.097235	0.116688	-0.182009	0.0344966	-0.135263	0.00289971	-0.230685	0.00019998	-0.149945	0.0247975	-0.12654	0.0313969	-0.135958	0.0633766	0.13043	0.255238
PM distance w/ Co-occurrence (Partial Seed distance)	-0.0207359	0.79582	-0.0975313	0.115388	-0.184465	0.0356964	-0.139712	0.00179982	-0.228634	9.999e-05	-0.133635	0.0446955	-0.13228	0.0232977	-0.133856	0.0654429	0.145257	0.289472
PM distance w/ Co-occurrence (Partial Seed competition)	-0.0211361	0.79782	-0.0987799	0.106689	-0.181143	0.0361964	-0.141368	0.00159984	-0.229534	9.999e-05	-0.132806	0.0412959	-0.133805	0.0213979	-0.134082	0.065043	0.143586	0.290705
PM distance w/ Co-occurrence (Partial Seed complementarity)	-0.020757	0.79902	-0.0967272	0.125987	-0.184571	0.0330967	-0.143175	0.00169983	-0.230413	0.00029997	-0.131117	0.0417958	-0.132243	0.019698	-0.134144	0.0660324	0.145943	0.291103
PM distance w/ Co-occurrence (Partial Reaction distance)	0.00275462	0.969103	-0.0812756	0.19548	-0.171692	0.0443956	-0.119116	0.00539946	-0.186608	0.00079992	-0.0734101	0.259474	-0.108484	0.0571943	-0.105404	0.0638875	0.218835	0.345145
PM distance w/ Co-occurrence (Partial Reaction Jaccard)	0.0103219	0.90171	-0.0833616	0.179882	-0.163117	0.0622938	-0.151175	0.00089991	-0.19968	0.00039996	-0.118833	0.0712929	-0.117768	0.040196	-0.117659	0.0676685	0.179525	0.324143
PM complementarity w/ Co-occurrence (Partial PM distance)	0.0453067	0.70423	0.0095936	0.912109	0.0470088	0.687031	-0.0048197	0.916208	0.0351423	0.559344	0.0745501	0.427457	-0.000659905	0.992501	0.029446	0.0291589	0.742697	0.207678
Seed distance w/ Co-occurrence (Partial PM distance)	-0.0906669	0.176582	-0.0358997	0.546145	-0.104291	0.19938	-0.0527983	0.218578	-0.049844	0.30167	-0.0822394	0.166883	-0.051624	0.349565	-0.0667662	0.025437	0.279829	0.135342
Seed competition w/ Co-occurrence (Partial PM distance)	-0.0757535	0.39896	-0.0220087	0.760324	-0.0814084	0.418758	-0.0358937	0.422358	-0.0374228	0.473653	-0.0533841	0.458554	-0.0417602	0.477952	-0.0496616	0.0218669	0.487223	0.124071
Seed complementarity w/ Co-occurrence (Partial PM distance)	-0.103694	0.311569	-0.0601211	0.457054	0.0077617	0.939606	-0.0041532	0.929207	-0.00733054	0.89691	0.0247578	0.763224	-0.0151958	0.809219	-0.0225679	0.0443037	0.729541	0.247803
Reaction distance w/ Co-occurrence (Partial PM distance)	-0.0914752	0.139786	-0.063312	0.265673	-0.0129789	0.881712	-0.0624653	0.151085	-0.100826	0.040096	-0.174427	0.00489951	-0.0998625	0.0781922	-0.0864781	0.0494306	0.223063	0.302713
Reaction Jaccard w/ Co-occurrence (Partial PM distance)	-0.0893296	0.187381	-0.0359529	0.558344	-0.0554053	0.537046	0.048304	0.263374	-0.0245694	0.614639	-0.00279939	0.970803	-0.0449244	0.419958	-0.0292396	0.0434366	0.507364	0.25798
