# Supplementary figures and images for: Metabolic network percolation quantifies biosynthetic capabilities across the human oral microbiome
Source: eLife journal article supplement (doi:10.7554/elife.39733), 2019-06-13

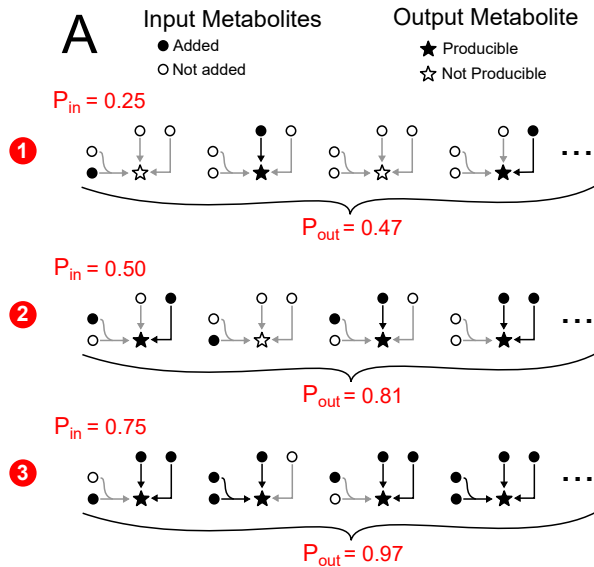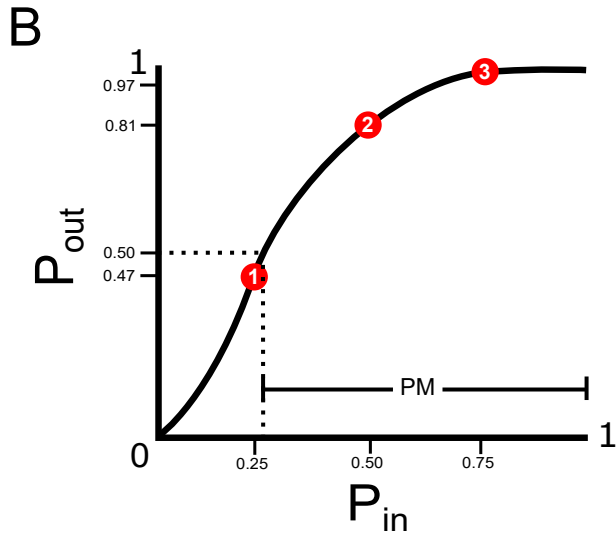

Supplement: supp [file elife_poa_e39733_Figure_1_figure_supplement_1.pdf › elife_poa_e39733_Figure_1_figure_supplement_1.pdf]

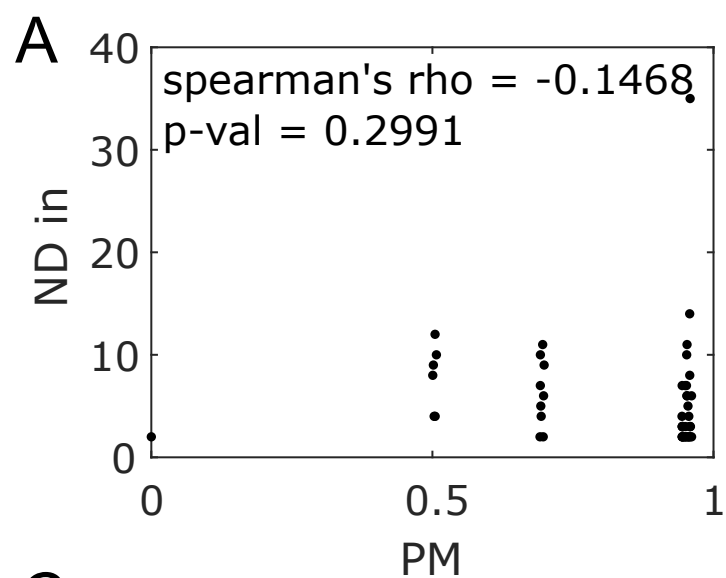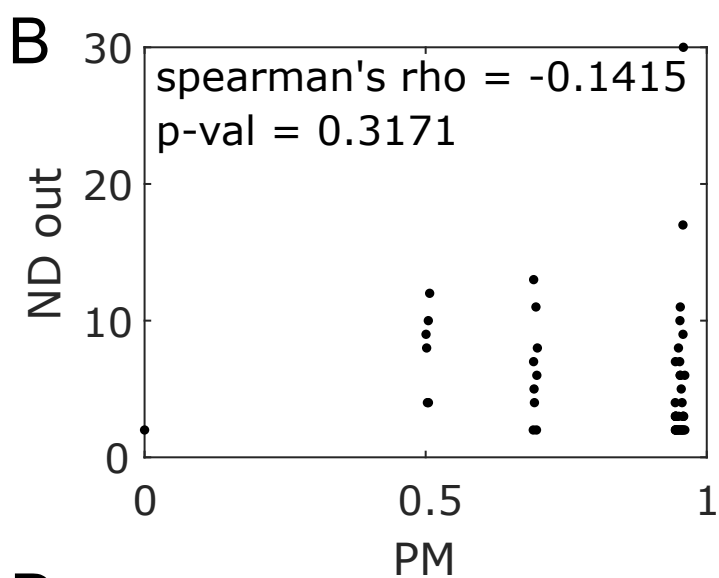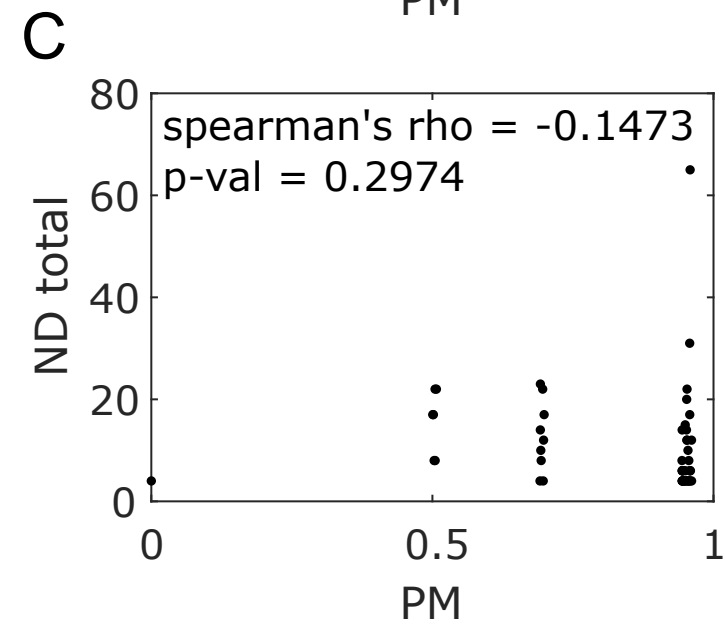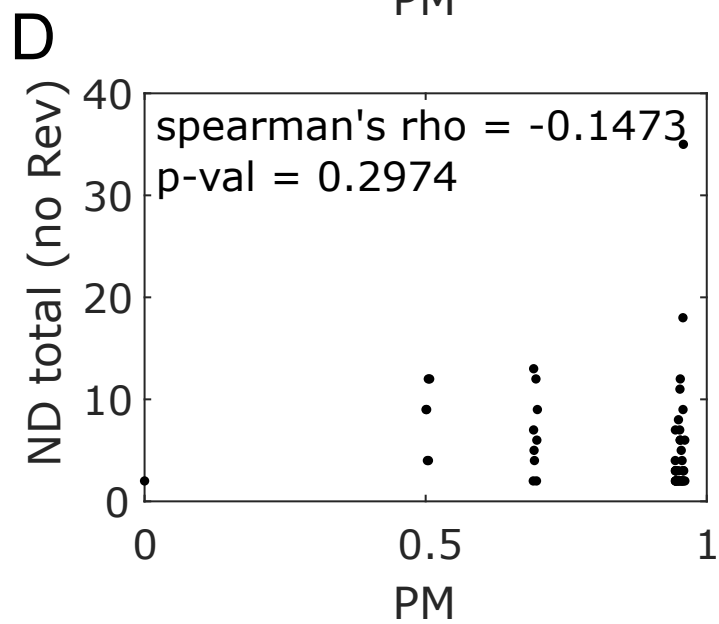

Supplement: supp [file elife_poa_e39733_Figure_2_figure_supplement_1.pdf › elife_poa_e39733_Figure_2_figure_supplement_1.pdf]

A

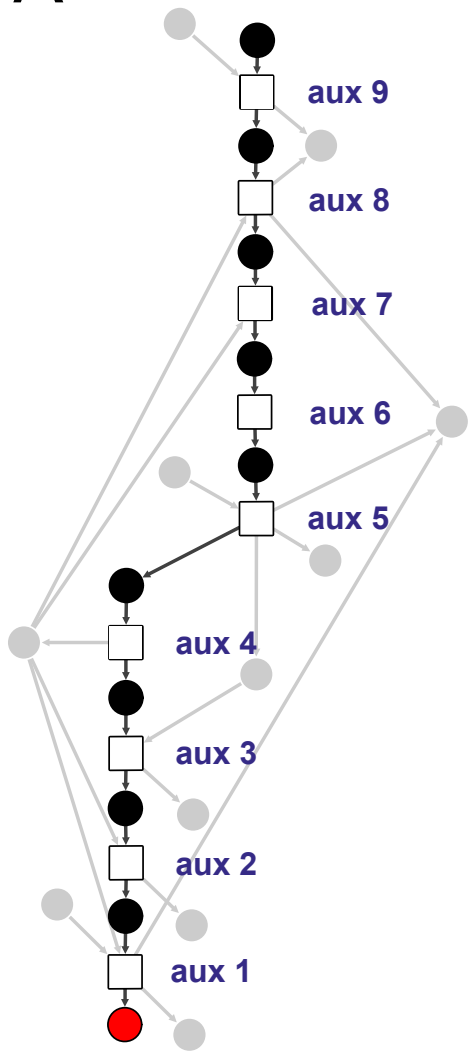

B

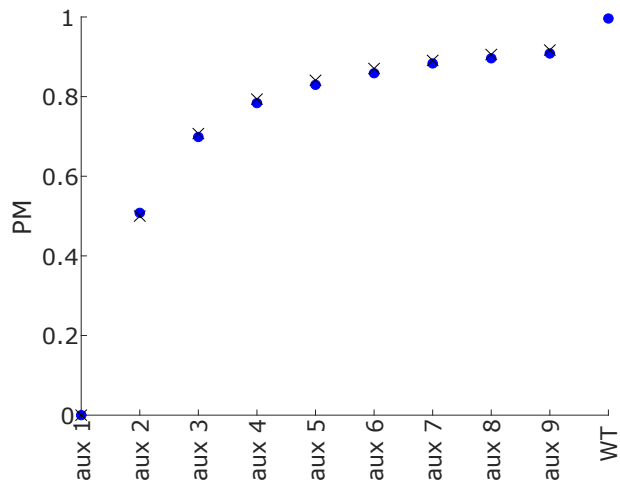

C

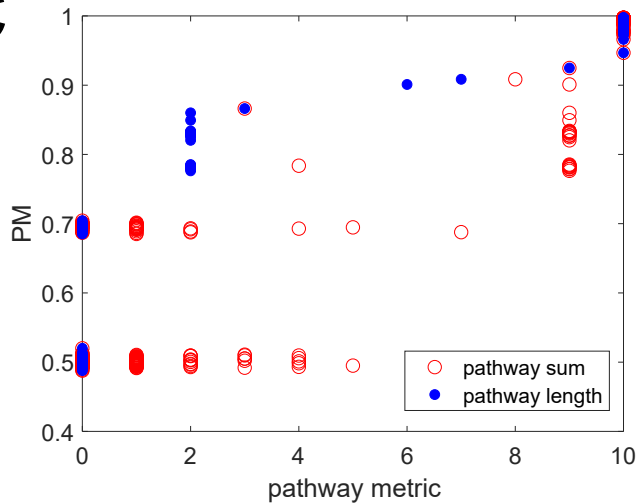

Supplement: supp [file elife_poa_e39733_Figure_2_figure_supplement_2.pdf › elife_poa_e39733_Figure_2_figure_supplement_2.pdf]

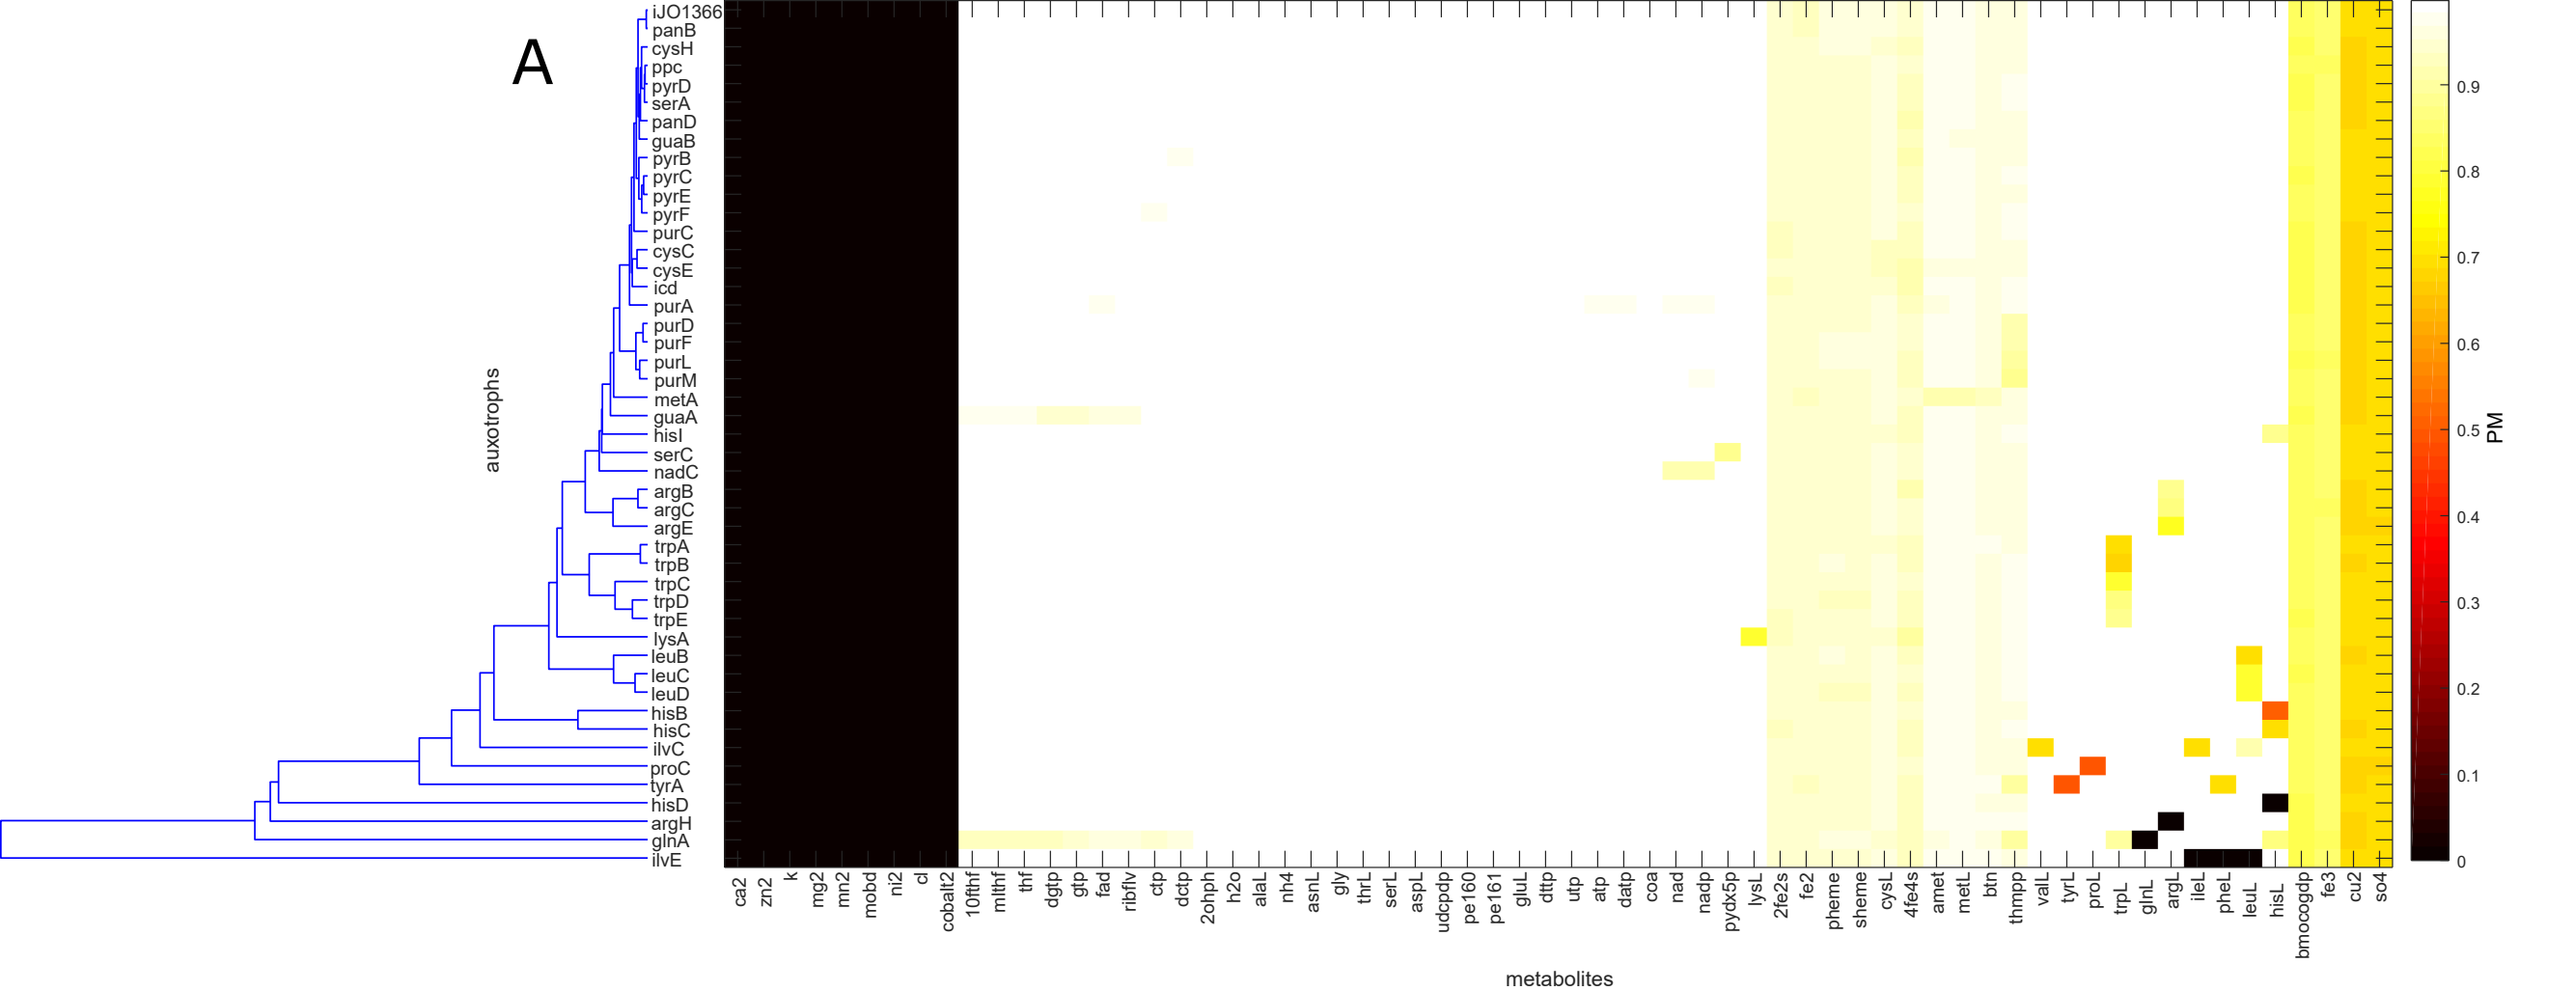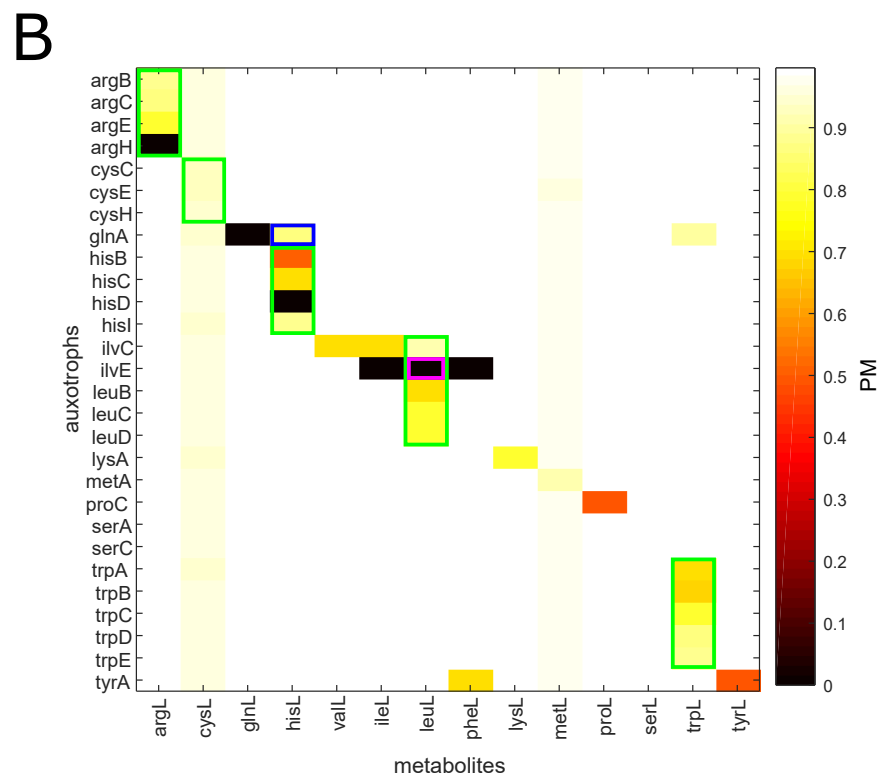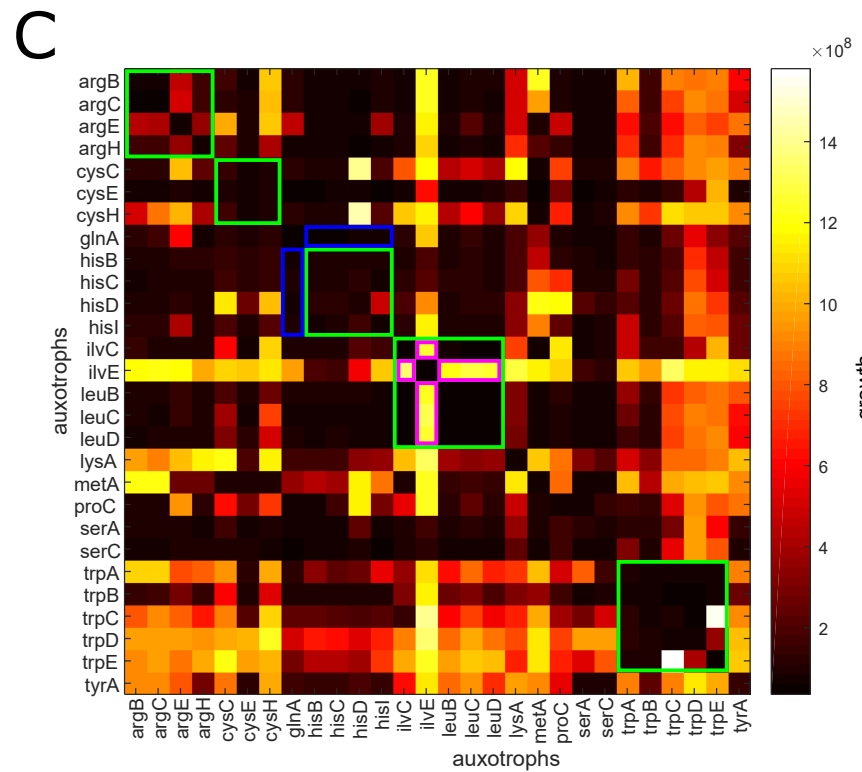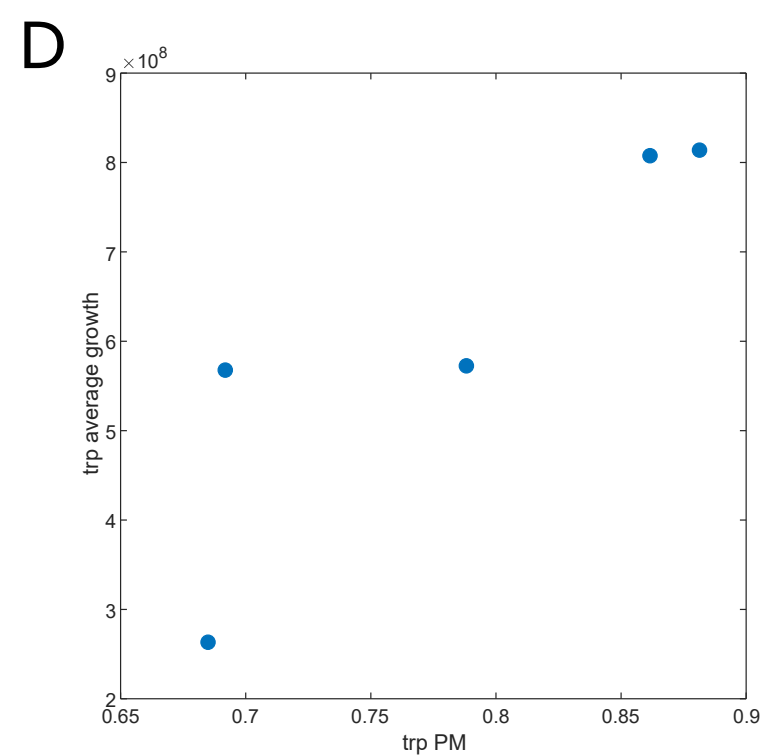

Supplement: supp [file elife_poa_e39733_Figure_3_figure_supplement_1.pdf › elife_poa_e39733_Figure_3_figure_supplement_1.pdf]

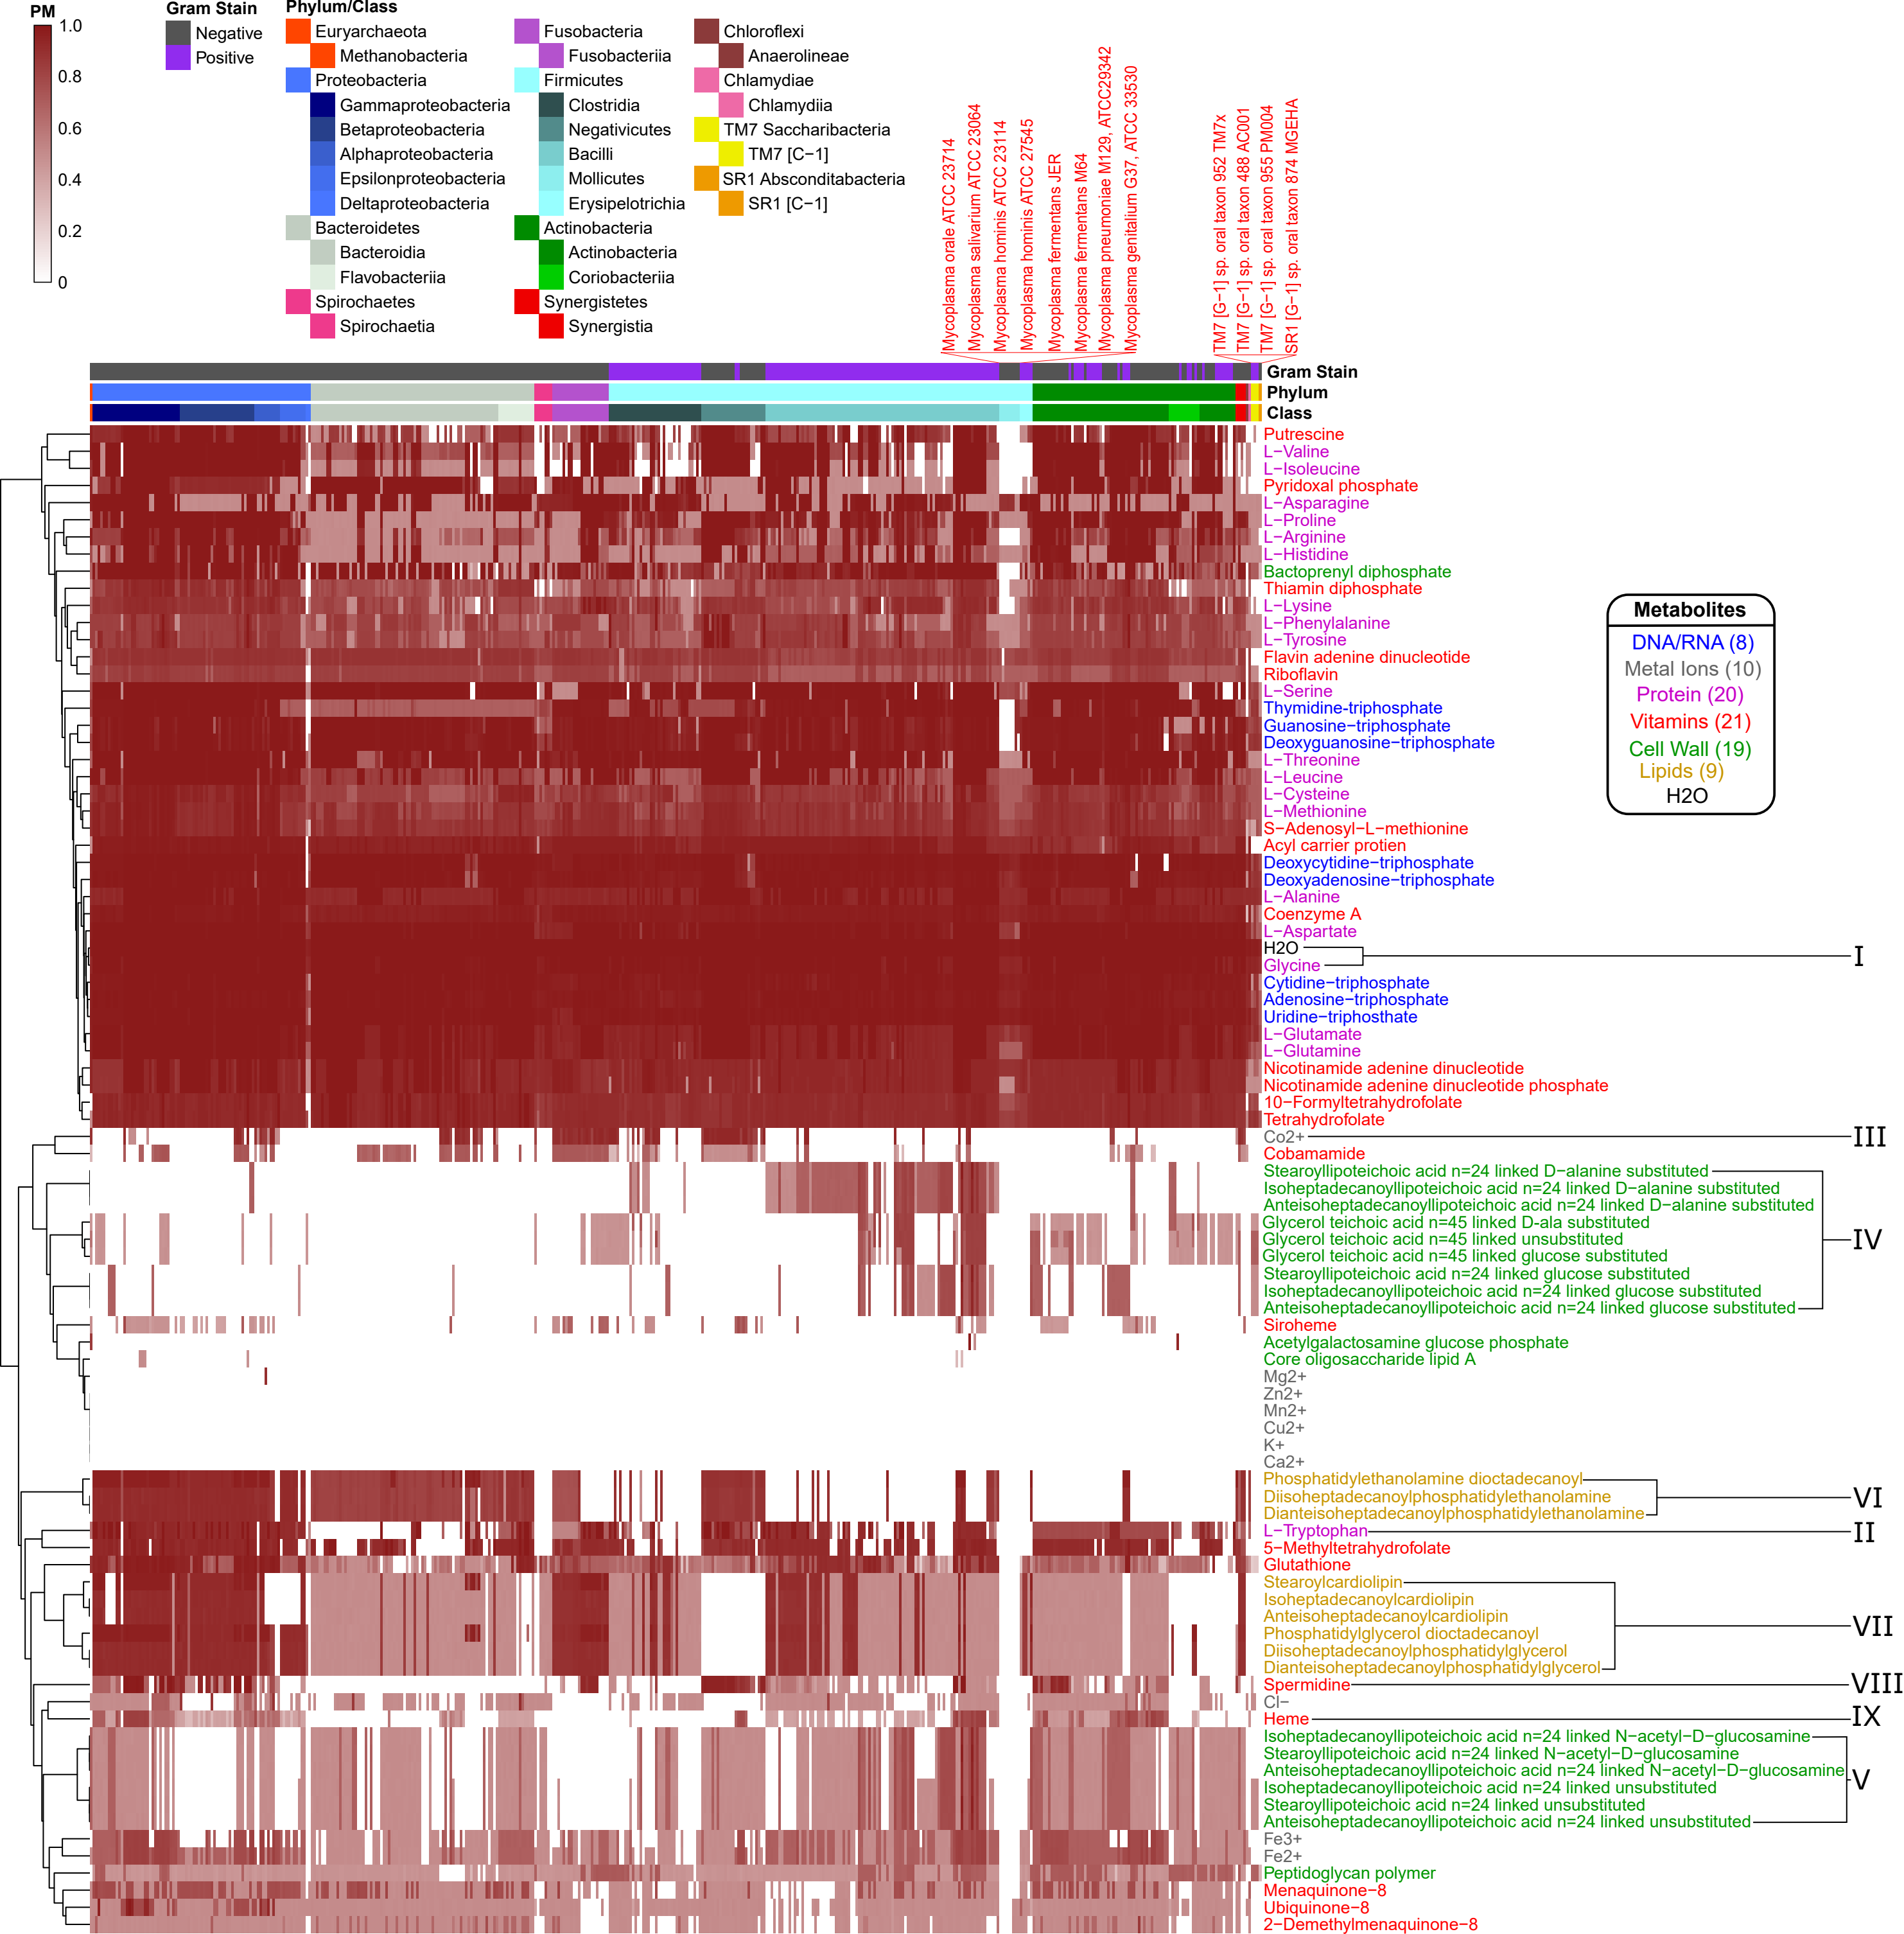

Supplement: supp [file elife_poa_e39733_Figure_4_figure_supplement_1.pdf › elife_poa_e39733_Figure_4_figure_supplement_1.pdf]

A

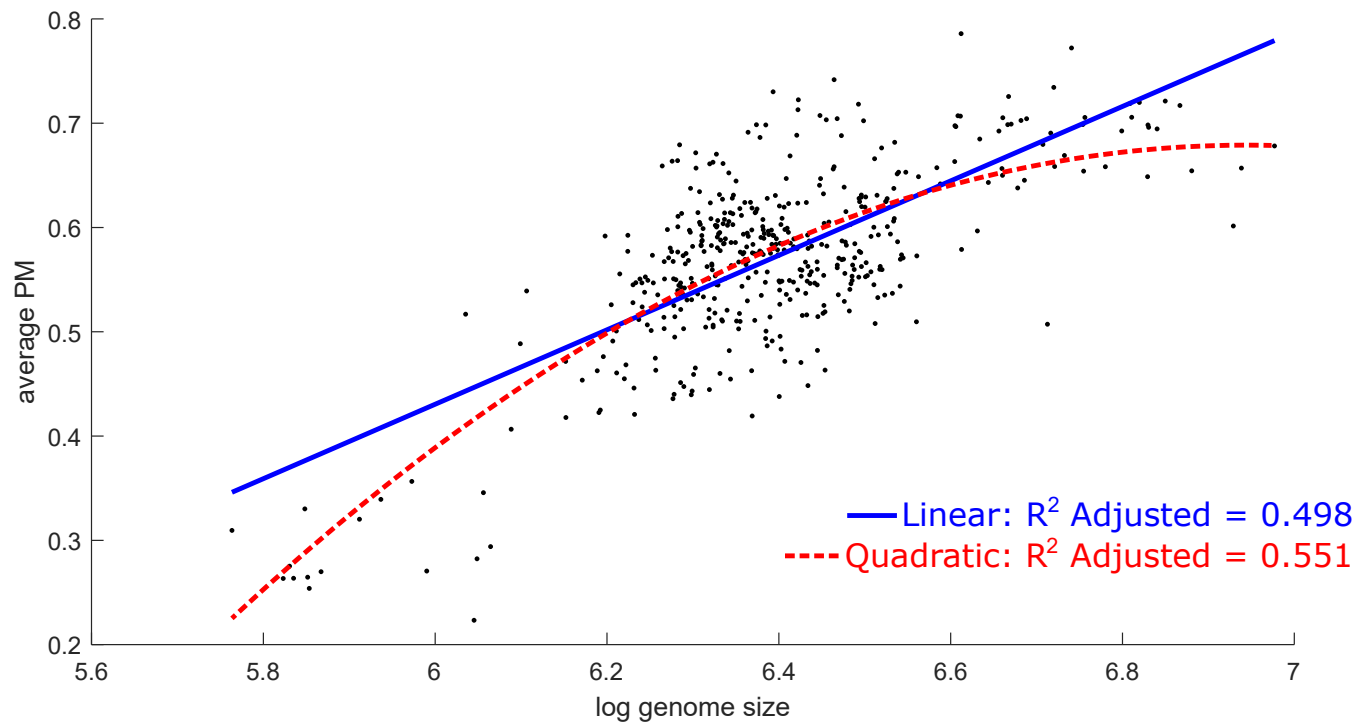

B

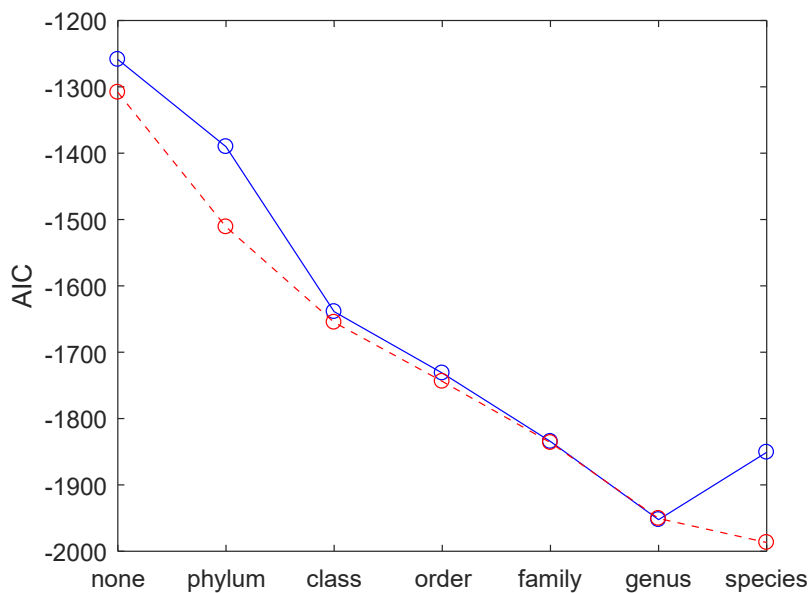

C

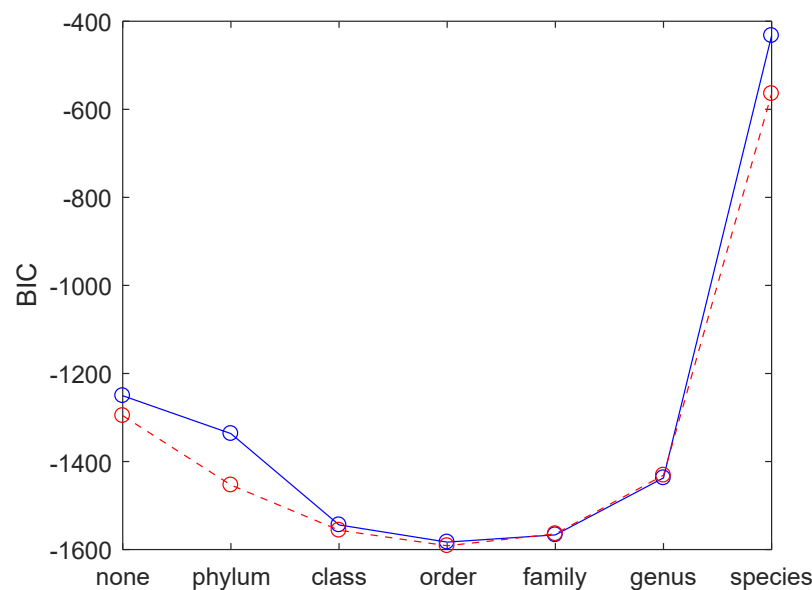

Supplement: supp [file elife_poa_e39733_Figure_4_figure_supplement_2.pdf › elife_poa_e39733_Figure_4_figure_supplement_2.pdf]

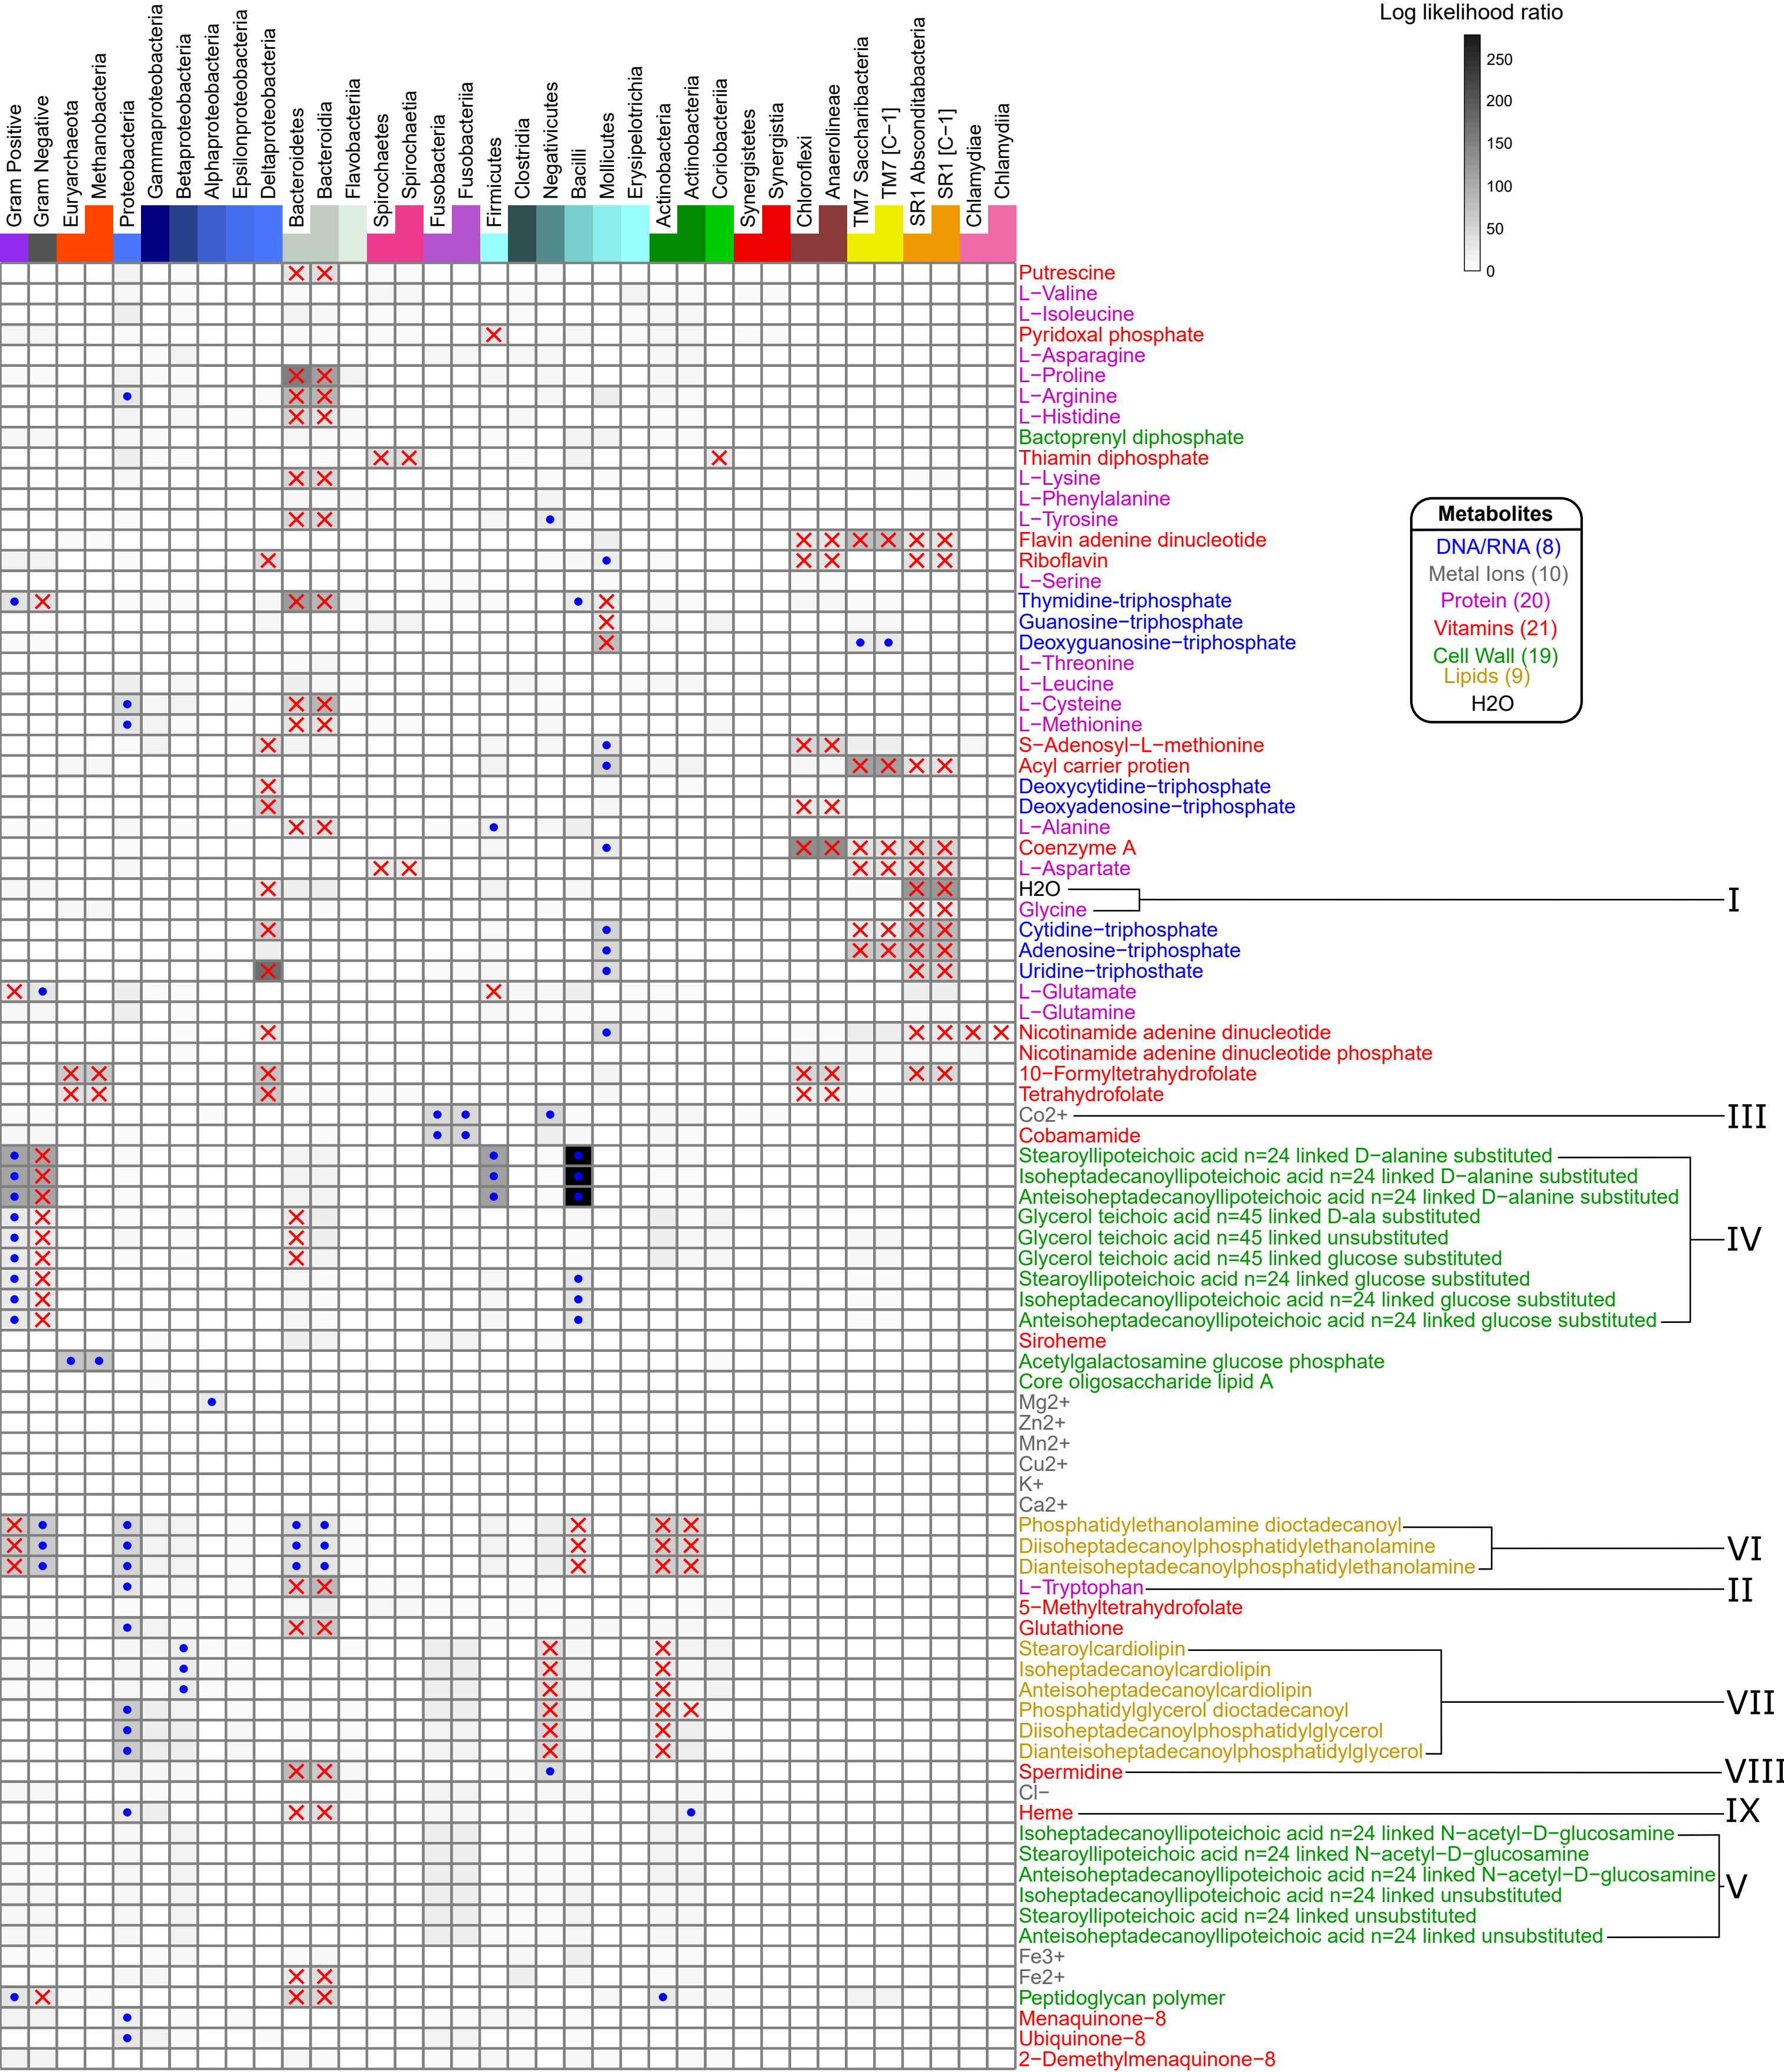

Supplement: supp [file elife_poa_e39733_Figure_4_figure_supplement_3.pdf › elife_poa_e39733_Figure_4_figure_supplement_3.pdf]

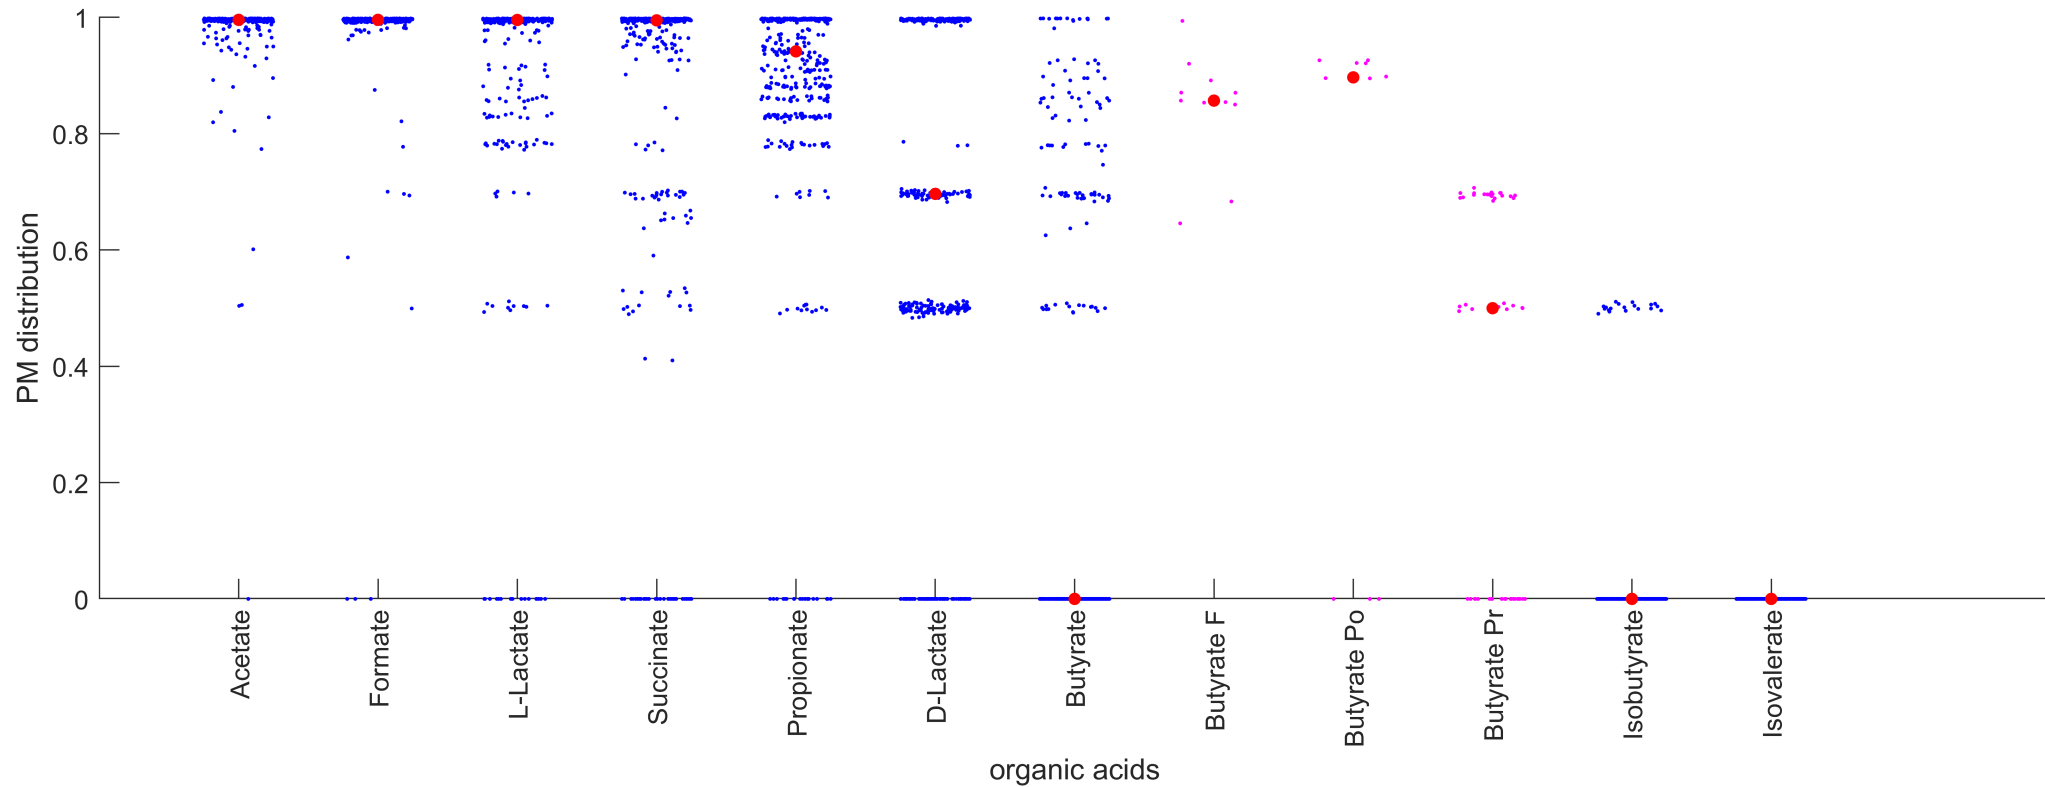

Supplement: supp [file elife_poa_e39733_Figure_4_figure_supplement_4.pdf › elife_poa_e39733_Figure_4_figure_supplement_4.pdf]

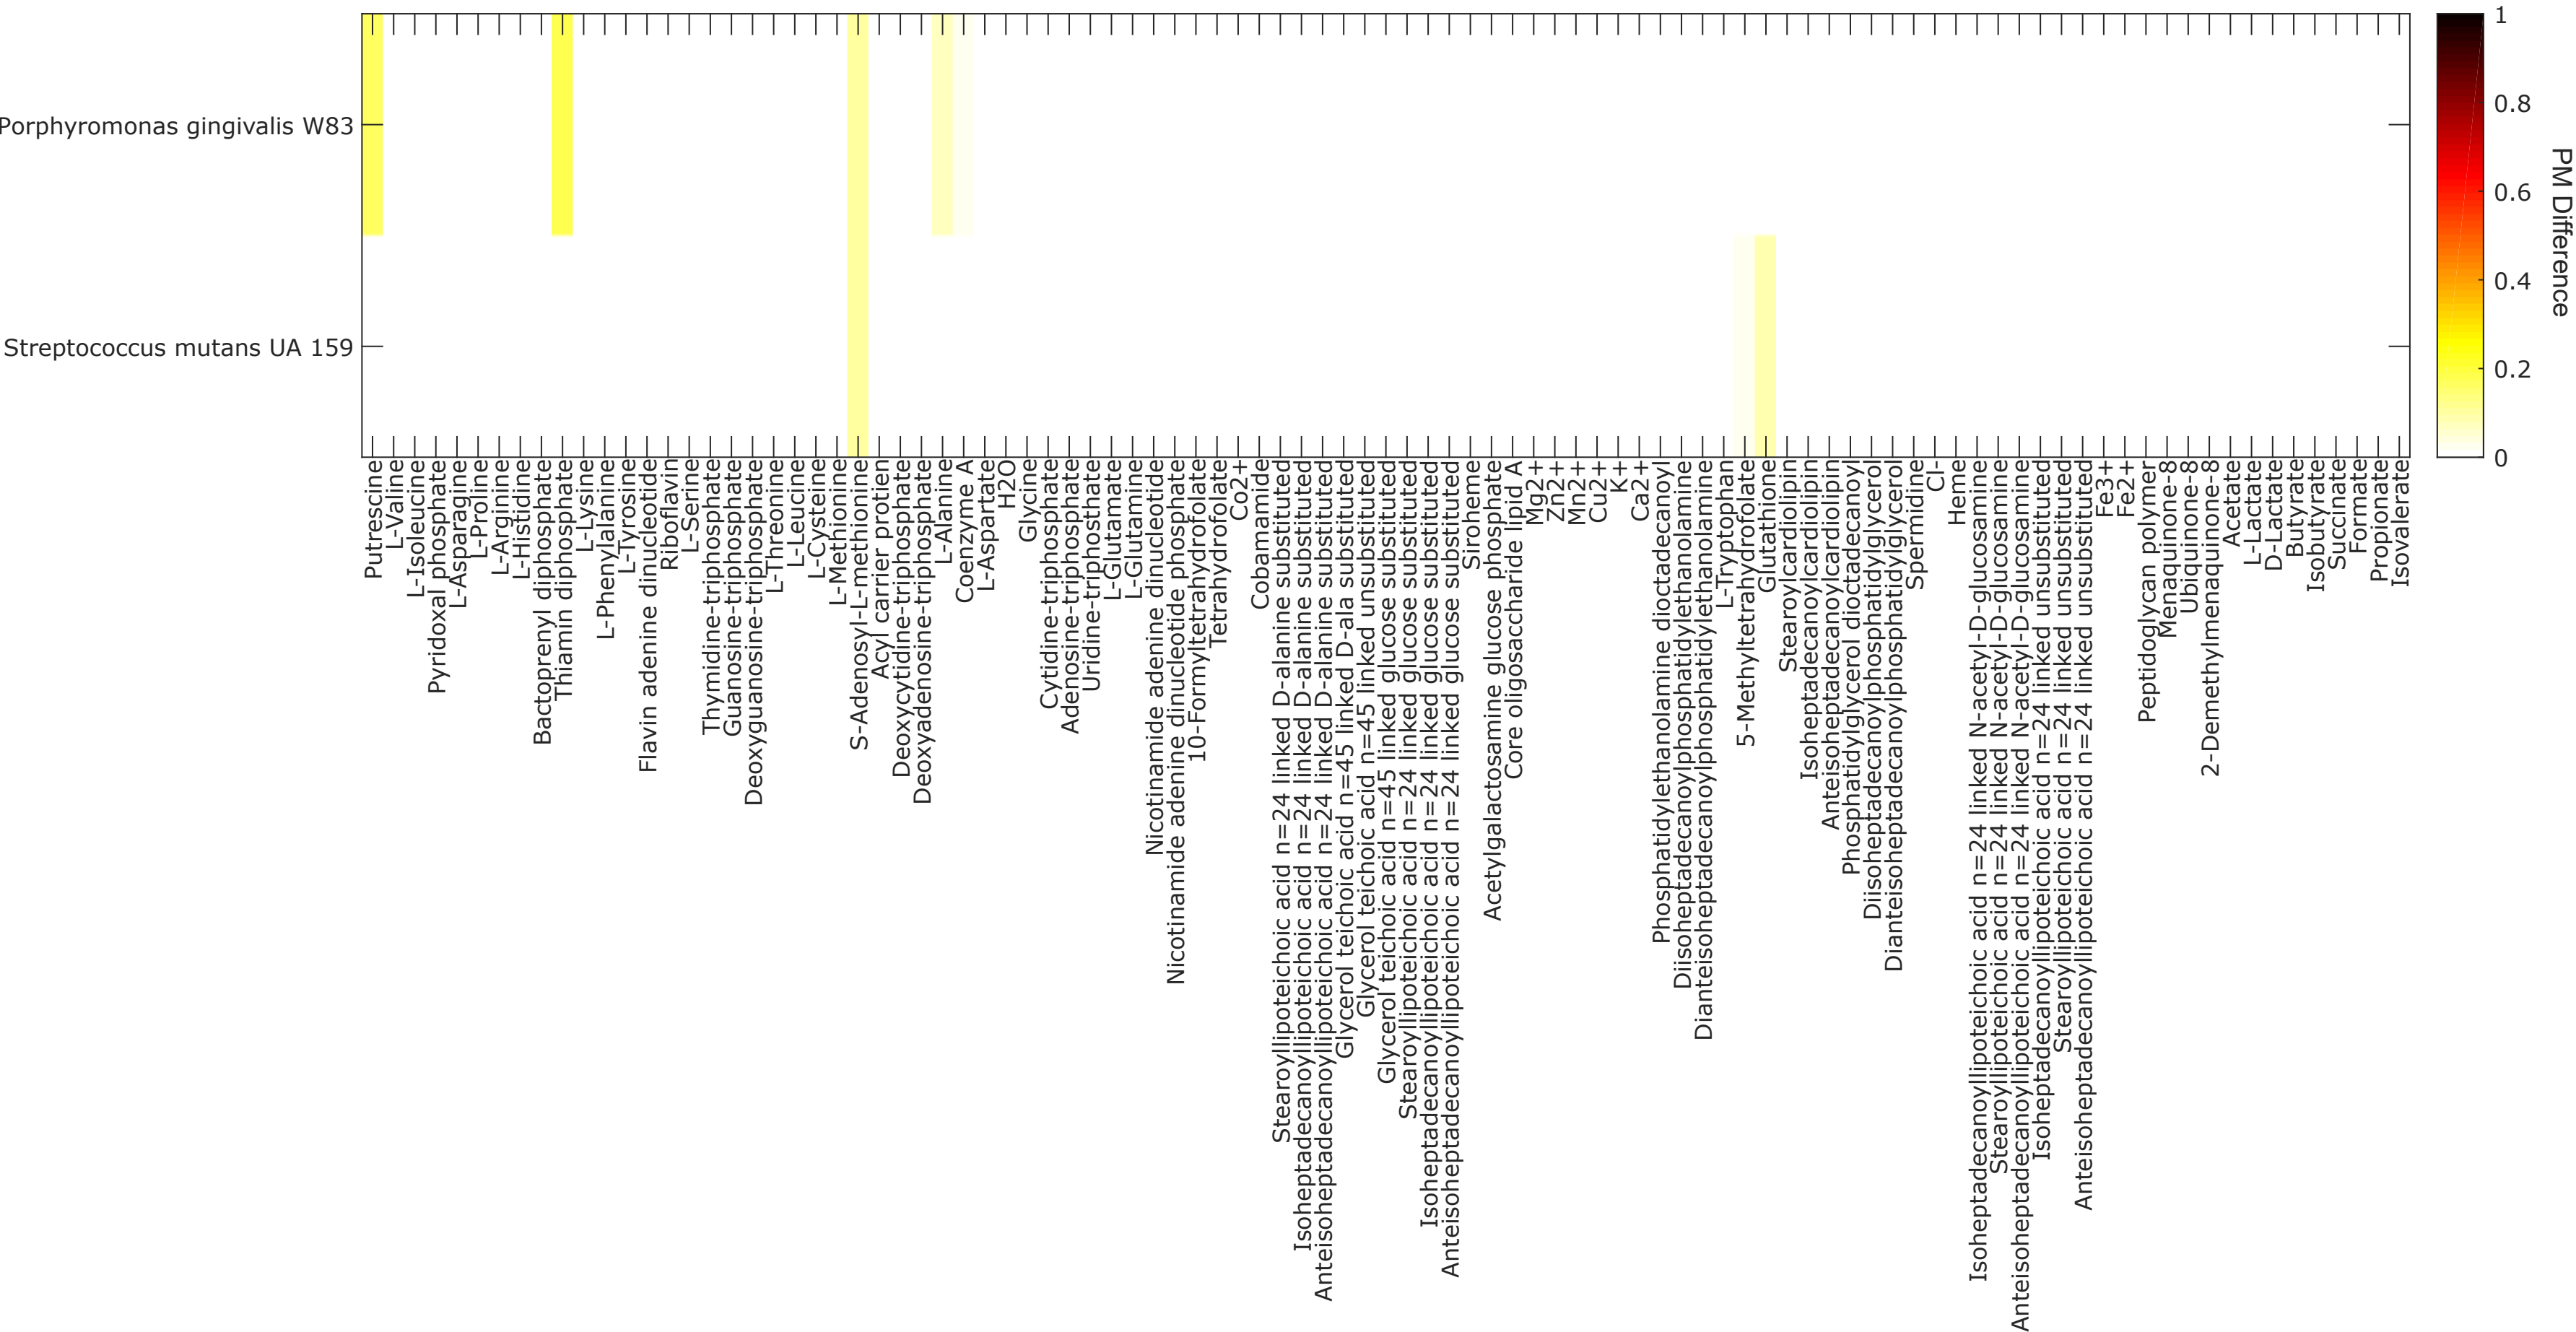

Supplement: supp [file elife_poa_e39733_Figure_4_figure_supplement_5.pdf › elife_poa_e39733_Figure_4_figure_supplement_5.pdf]

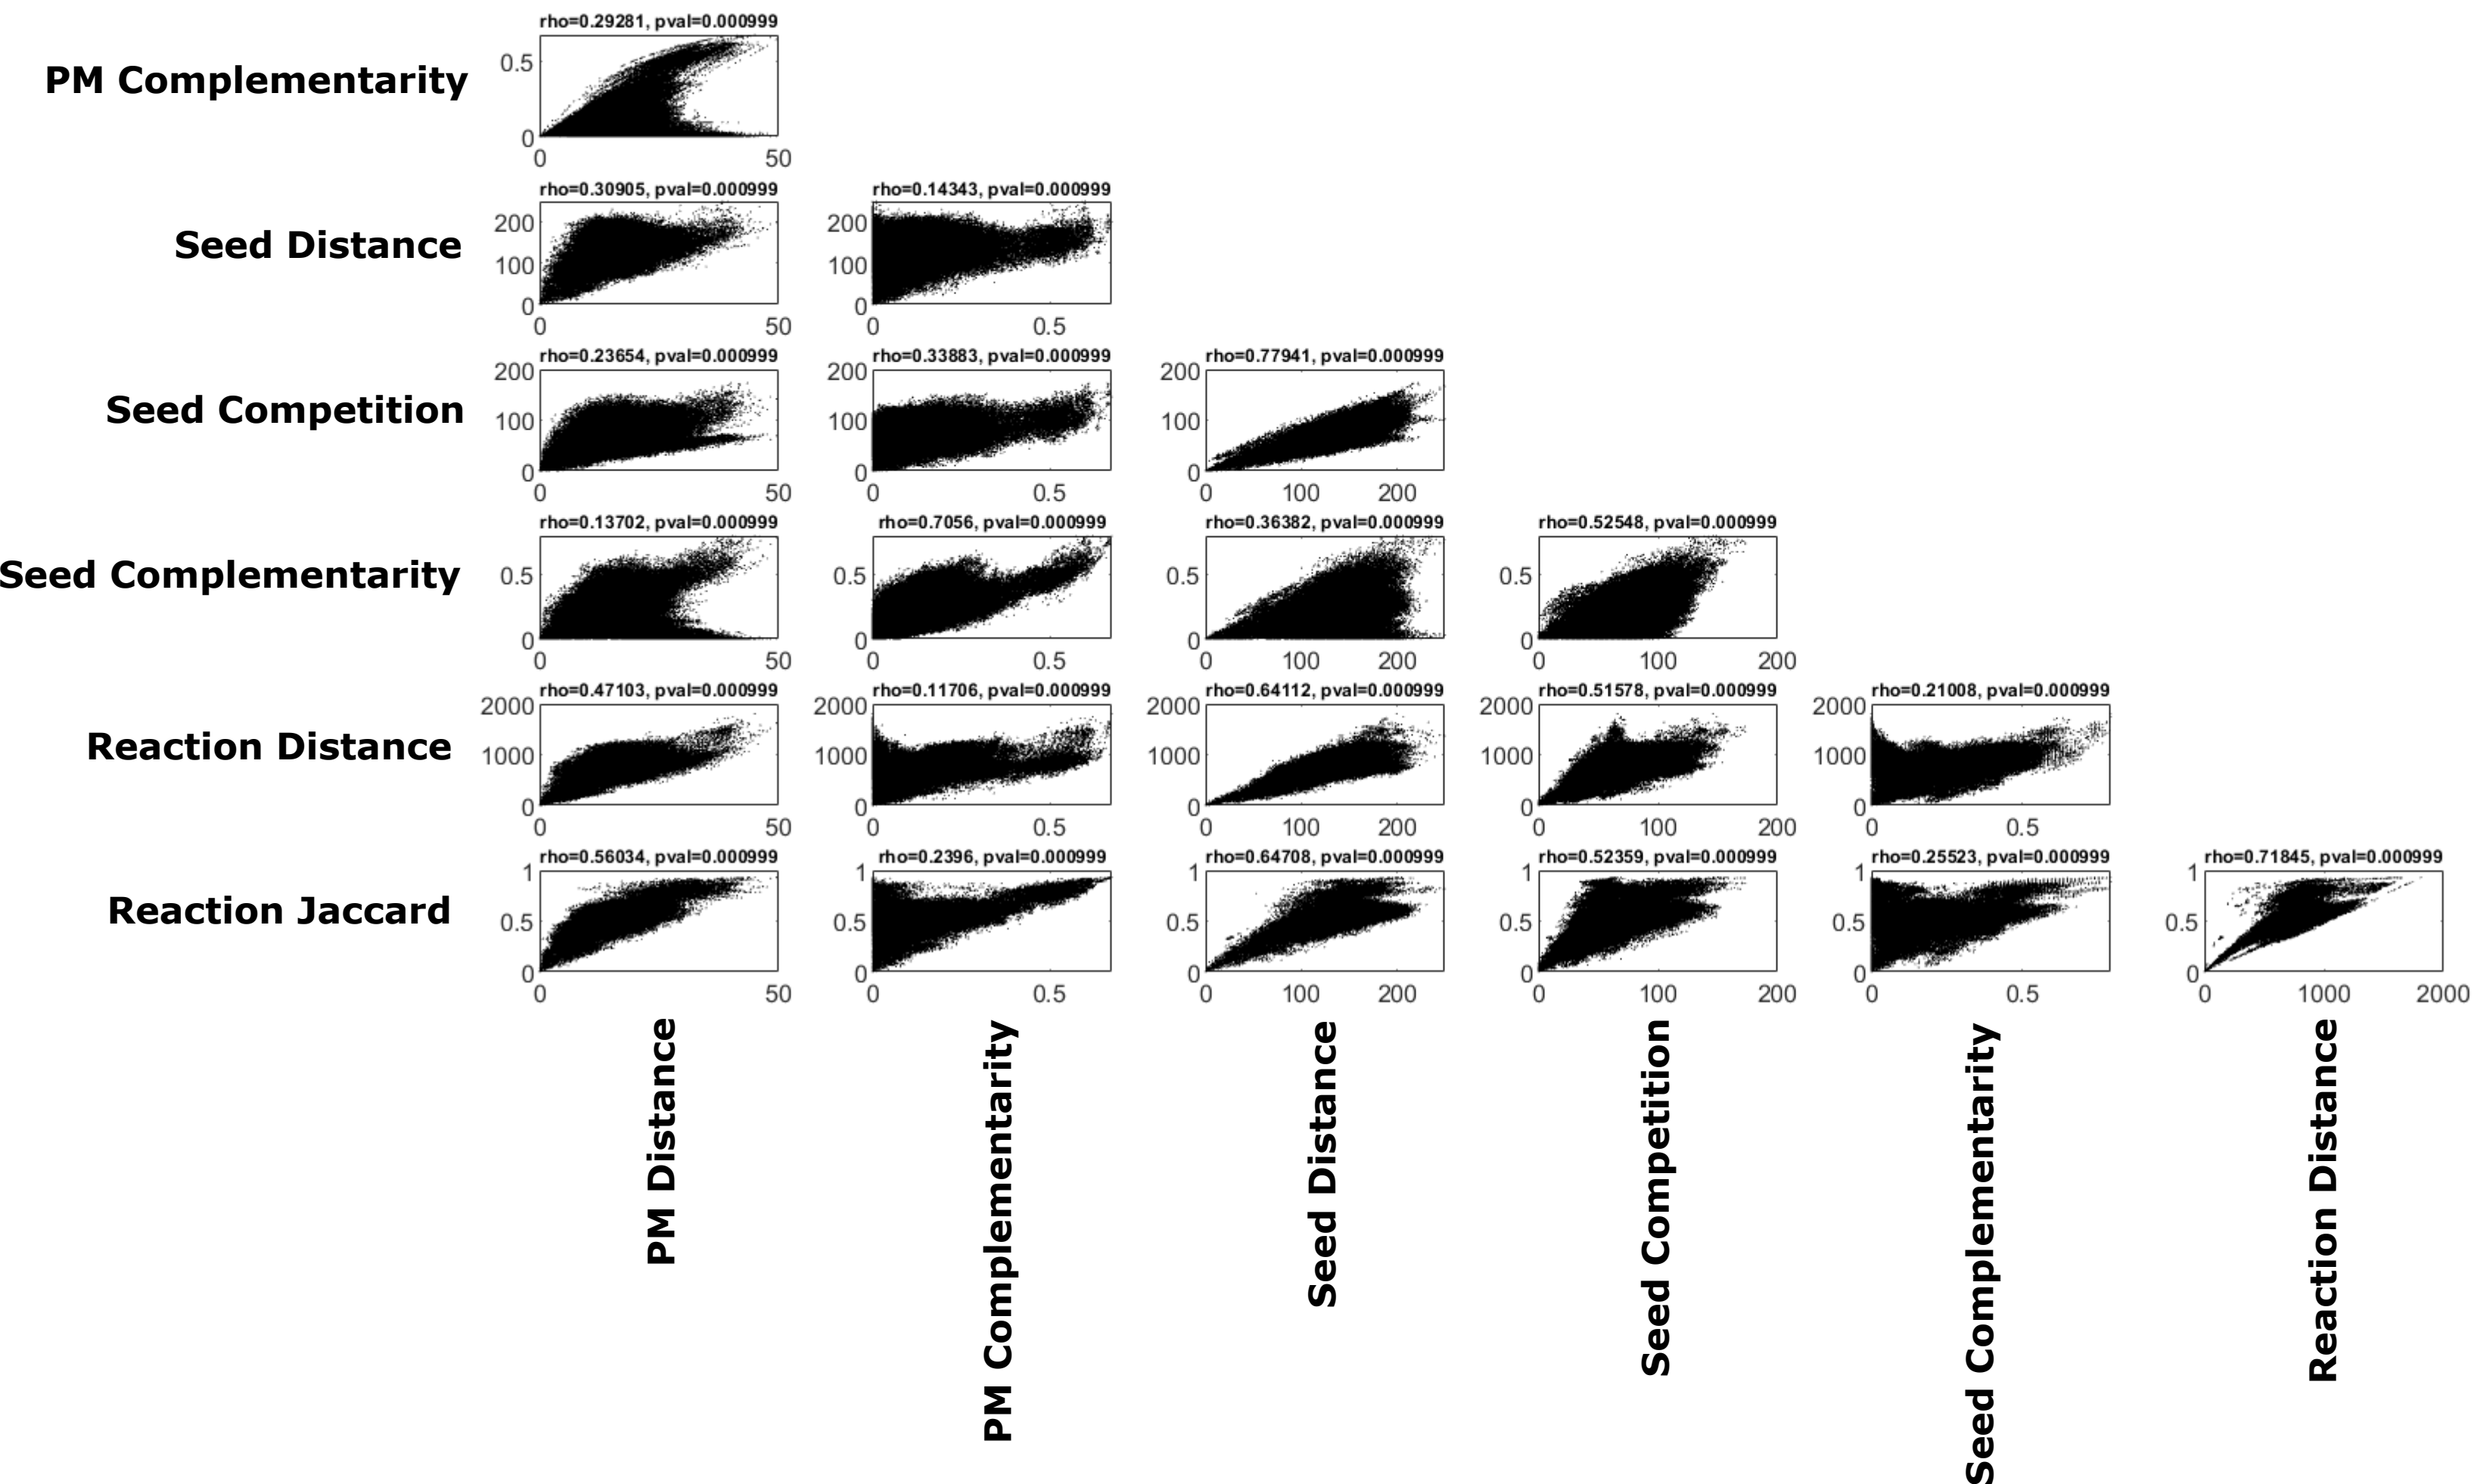

Supplement: supp [file elife_poa_e39733_Figure_4_figure_supplement_6.pdf › elife_poa_e39733_Figure_4_figure_supplement_6.pdf]

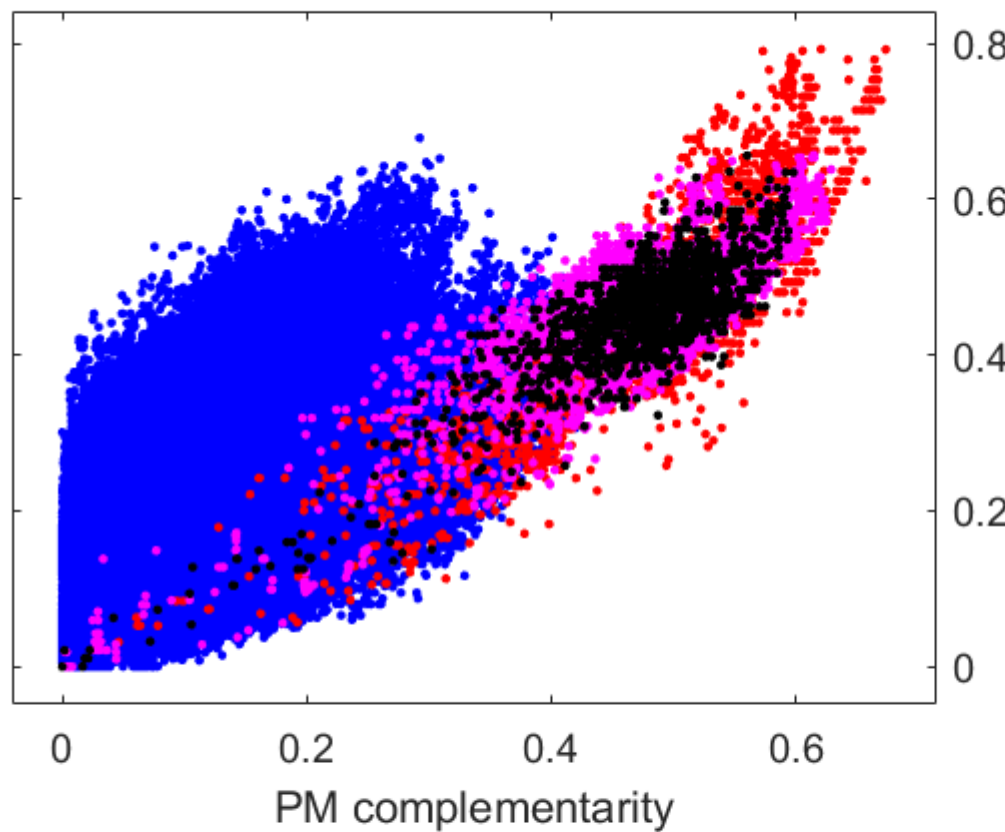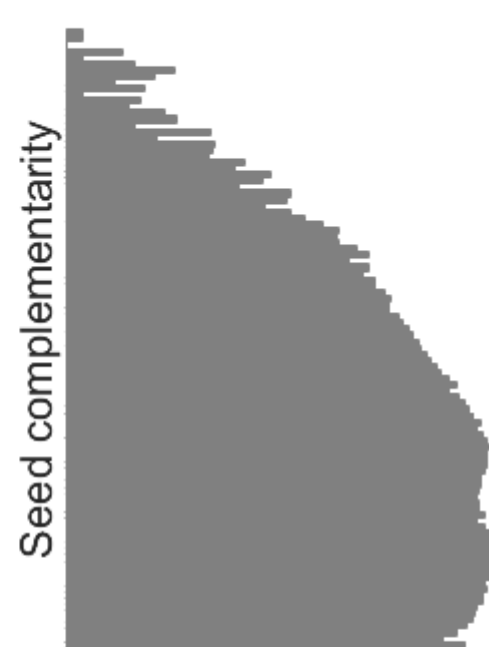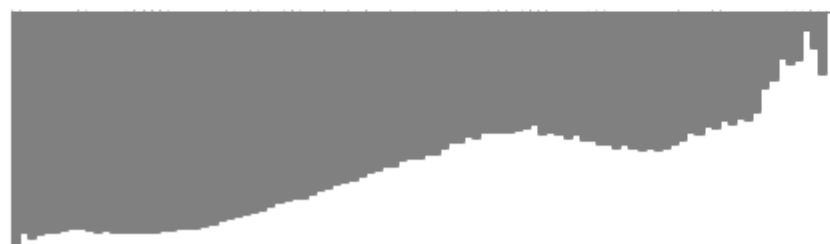

- All to All
- All to Fastidious
- All to Mycoplasma
- All to TM7

Supplement: supp [file elife_poa_e39733_Figure_4_figure_supplement_7.pdf › elife_poa_e39733_Figure_4_figure_supplement_7.pdf]

A

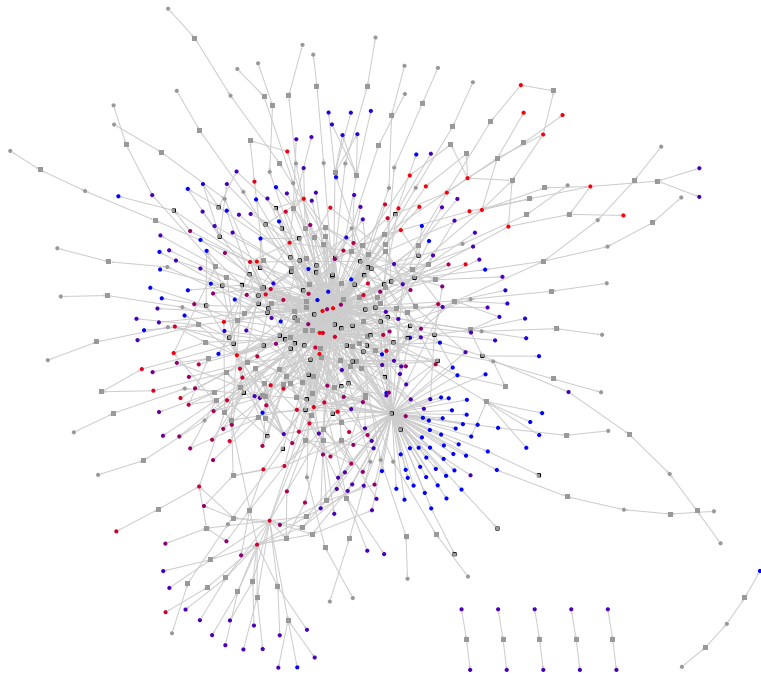

B

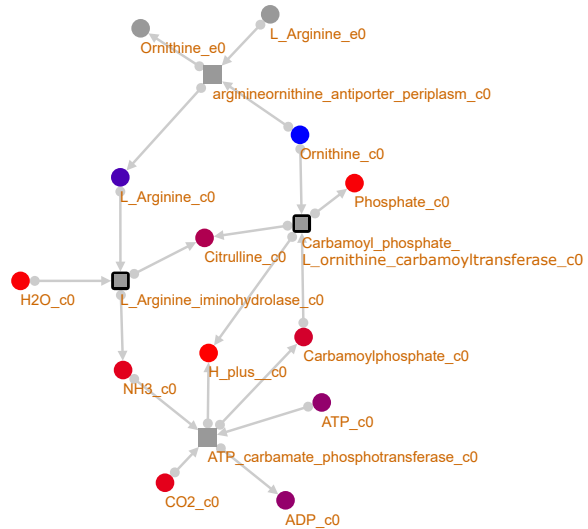

Supplement: supp [file elife_poa_e39733_Figure_6_figure_supplement_1.pdf › elife_poa_e39733_Figure_6_figure_supplement_1.pdf]
